# **Impact of recreational fisheries on aquatic and riparian biodiversity in artificial lake ecosystems: implications for conservation**

Robert Nikolaus<sup>1</sup>, Malwina Schafft<sup>1</sup>, Andreas Maday<sup>1</sup>, Christian Wolter<sup>1</sup> & Robert Arlinghaus<sup>1,2</sup>

<sup>1</sup>Department of Biology and Ecology of Fishes, Leibniz-Institute of Freshwater Ecology and Inland Fisheries, Germany

<sup>2</sup>Division for Integrative Fisheries Management, Albrecht Daniel Thaer-Institute of Agriculture and Horticulture, Faculty of Life Science, Humboldt-Universität zu Berlin, Germany

## Abstract

1 There is consensus that humanity is facing a global biodiversity crisis, with freshwater-associated  
2 biodiversity being reported to be in particularly dire state. Novel ecosystems created through human  
3 use of littoral resources (e.g., sand, gravel), i.e., gravel pit lakes, can provide substitute habitats of  
4 importance to conservation of freshwater biodiversity. However, we can expect these lakes, which  
5 are often managed for and by recreational fisheries, to also exhibit generally high recreational use  
6 intensity, which may negatively impact aquatic biodiversity. Our objective was to evaluate the  
7 species inventory and conservation value of a range of aquatic and riparian taxa (plants, amphibians,  
8 dragonflies, damselflies, waterfowl, songbirds) within and associated with artificially created lake  
9 ecosystems managed by recreational fisheries. To examine the specific impact of recreational  
10 fisheries we compared the biodiversity in N = 16 gravel pits managed by recreational fisheries with N  
11 = 10 lakes that were not experiencing recreational fisheries, while controlling for a set of  
12 environmental variables. Managed and unmanaged gravel pit lakes were similar in regards to  
13 morphological and productivity-related lake variables, while differing in littoral and riparian habitat  
14 structure and recreational use intensity by anglers and other recreationists. Despite these  
15 differences, the average species richness and conservation value of all the examined taxa was similar  
16 among both lake types, with the exception of amphibians whose conservation value was found to be  
17 larger in unmanaged lakes. With the exception of submerged macrophytes – a taxon found to be  
18 particularly species rich and extensively developed in managed lakes - no faunal breaks in any of the  
19 taxa were revealed when examining the pooled species inventory of managed and unmanaged lakes.  
20 Variation in species richness and conservation value among lakes was strongly driven by available  
21 vegetated and woody habitat, lake morphology and location in the landscape, rather than being  
22 related to the presence of recreational fisheries or recreational use intensity. Collectively, we found  
23 no evidence that anglers and recreational-fisheries management constitute a relevant stressor to  
24 aquatic and riparian biodiversity.

## Keywords

amphibians, biodiversity, birds, conservation, macrophytes, management, novel ecosystems,  
odonata, recreational fishing, waterfowl

## 1. Introduction

1 Globally, biodiversity is in steep decline, creating a biodiversity crisis of unprecedented scale (Brooks  
2 et al., 2006; Ceballos, García, & Ehrlich, 2010; IPBES, 2019; WWF, 2018). The numbers of endangered  
3 species are constantly rising (Butchart et al., 2010; WWF, 2018), with an estimated number of at  
4 least 1 million species threatened by extinction (IPBES, 2019). The current species extinction rates are  
5 estimated to be about 1000 times higher than the calculated background extinction rate (Pimm et al.,  
6 2014). The biodiversity decline is particularly prevalent in freshwaters compared to marine and  
7 terrestrial environments (Abell, 2002; Freyhof & Brooks, 2011; Sala et al., 2000; WWF, 2018). From  
8 1970 to today, freshwater biodiversity has declined by 83% in abundances across thousands of  
9 populations (WWF, 2018). Analysis of European red lists has shown that more than a third (37%) of  
10 freshwater fishes are threatened (Freyhof & Brooks, 2011). This compares with 44% of freshwater  
11 molluscs, 23% of amphibians, 19% of reptiles, 15% of mammals and dragonflies, 13% of birds, 9% of  
12 butterflies and 7% of the aquatic plants present in Europe (Freyhof & Brooks, 2011). Although  
13 manifold reasons contribute to the freshwater biodiversity crisis (Reid et al., 2019), habitat alteration  
14 and fragmentation (e.g., due to damming or land use changes), pollution, overexploitation, invasive  
15 species and climate change are key threats (Dudgeon et al., 2006; IPBES, 2019).

16 Freshwater-associated species respond to aquatic environmental variables as well as those  
17 associated with riparian habitat quality and land use. The specific drivers vary by species and taxon.  
18 For example, the diversity of submerged macrophytes is strongly governed by nutrient inputs (which  
19 is fundamentally related to land use and hydrology at catchment scales) and in-water chemical  
20 variables, sediments and water turbidity (which affects light penetration) (Hilt et al., 2018; Stefanidis,  
21 Sarika, & Papastegiadou, 2019). However, submerged macrophytes can also be negatively affected  
22 by benthivorous fish (Bajer et al., 2016) and herbivory, e.g. by crayfish (Carreira, Dias, & Rebelo,  
23 2014; Roessink, Gylstra, Heuts, Specken, & Ottburg, 2017; van der Wal et al., 2013) and waterfowl  
24 (Wood, Stillman, Clarke, Daunt, & O'Hare, 2012). By contrast, amphibian species diversity is more  
25 strongly dependent on habitat fragmentation and loss affecting migration corridors in terrestrial  
26 ecosystems (Gonçalves, Honrado, Vicente, & Civantos, 2016; Shulse, Semlitsch, Trauth, & Williams,  
27 2010; Trochet et al., 2019); hence this taxon will be strongly influenced by land use developments,  
28 urbanization, settlements and loss of temporary waters (Nowakowski, Frishkoff, Thompson, Smith, &  
29 Todd, 2018). Additionally amphibians and in particular tadpoles are sensitive to fish predation  
30 (Shulse et al., 2010) and are affected by littoral habitat structure and water depth (Porej &  
31 Hetherington, 2005). Similarly, the diversity of dragonflies and damselflies is controlled by the spatial  
32 arrangement of water bodies in a landscape, and littoral habitat homogenization and loss of  
33 vegetation and other structures (e.g., woody habitat) (Clausnitzer et al., 2009; Elo, Penttinen, &  
34 Kotiaho, 2015; Goertzen & Suhling, 2018; Koch, Wagner, Sahlén, & Tsubaki, 2014) as well as fish

35 predation during the larval aquatic stages (Knorp & Dorn, 2016; Morin, 1984a, 1984b) also play an  
36 important role in driving local species diversity. Key threats to bird populations associated with  
37 freshwater ecosystems encompass land use changes, climate shifts, pollution, loss of forage bases,  
38 mortality increases through pets (e.g., cats; see Bonnaud, Berger, Bourgeois, Legrand, & Vidal, 2012)  
39 and humans (e.g., hunting), but birds are also sensitive to non-lethal disturbances caused by humans  
40 due to proximity to urban areas and after exposure to intensive outdoor recreation (BirdLife  
41 International, 2015; Wahl *et al.*, 2015). Given the complexity of taxon-specific environmental drivers  
42 on freshwater biodiversity, it is difficult to identify a common set of key environmental factors to  
43 inform effective conservation management across taxa at individual water bodies.

44 Artificially created aquatic habitats, such as gravel pit lakes or ponds, can play an important role in  
45 maintaining and increasing native biodiversity by providing refuges and secondary habitat for rare or  
46 endangered species across a range of taxa (Biggs, von Fumetti, & Kelly-Quinn, 2017; Damnjanović *et*  
47 *al.*, 2018; De Meester *et al.*, 2005; Lemmens *et al.*, 2013; Lenda, Skórka, Moroń, Rosin, & Tryjanowski,  
48 2012; Santoul, Gaujard, Angélibert, Mastrorillo, & Céréghino, 2009; Scheffer *et al.*, 2006; Völkl, 2010).  
49 Artificial lake ecosystems are often relatively recent in origin (< 100 years of age, Gee, 1978; Schurig,  
50 1972; R. M. Wright, 1990; Zhao, Grenouillet, Pool, Tudesque, & Cucherousset, 2016), created by  
51 mining of sand, clay, gravel and other resources (Saulnier-Talbot & Lavoie, 2018; Søndergaard,  
52 Lauridsen, Johansson, & Jeppesen, 2018). More than one billion tons of sand, gravel and other littoral  
53 resources were excavated in more than 24,500 quarries and pits within the EU-28 in 2017 alone  
54 (Delvoie, Zhao, Michel, & Courard, 2019; UEPG, 2017). Germany is the largest producer of sands in  
55 Europe, generating 256 million tons in 2,733 quarries and pits in 2017 (Delvoie, Zhao, Michel, &  
56 Courard, 2019; UEPG, 2017). The resulting numerous man-made “pit lakes” (for simplicity henceforth  
57 referred to as gravel pit lakes) have become common landscape elements in many cultural  
58 landscapes across the industrialized world (Blanchette & Lund, 2016; Mollema & Antonellini, 2016;  
59 Søndergaard *et al.*, 2018). For example, in the study area of the research present in this paper (Lower  
60 Saxony in Germany), gravel pits today constitute the dominant lentic habitat, constituting about 95%  
61 (in numbers) and 70% (in terms of area) of all water bodies larger than 1 ha (Manfrin *et al.*,  
62 unpublished data). Accordingly, gravel pit lakes have become important for both biodiversity  
63 conservation and recreation (Emmrich, Schällicke, Hühn, Lewin, & Arlinghaus, 2014; Matern *et al.*, in  
64 press).

65 Lakes, including gravel pit lakes, provide a bundle of ecosystem services to humans (Reynaud &  
66 Lanzanova, 2017). These include provisioning services, such as fish yield, drinking water supply as  
67 well as a range of cultural ecosystem services, in particular recreation (Venohr *et al.*, 2018) and  
68 intrinsic benefits associated with the presence of threatened aquatic biodiversity (Holmlund &  
69 Hammer, 1999; Reynaud & Lanzanova, 2017). Although the benefits of water-based recreation can

70 be substantial (Venohr et al., 2018), recreation can also negatively impact on the biodiversity of  
71 freshwater ecosystems (Larson, Reed, Merenlender, & Crooks, 2016; Liddle & Scorgie, 1980). For  
72 example, human activities on the shoreline can alter habitats, which can lead to a loss of plant  
73 biodiversity through trampling effects (Bonanno, Leopold, & Hilaire, 1998; Manning, 1979; O'Toole,  
74 Hanson, & Cooke, 2009; Seer, Irmiler, & Schrautzer, 2015). Shoreline development, e.g., habitat  
75 simplification through the construction of beaches or other recreation sites, can reduce littoral and  
76 riparian habitat quality and affect macroinvertebrate abundance and biodiversity (Brauns, Garcia,  
77 Walz, & Pusch, 2007; Spyra & Strzelec, 2019). Water-based recreation can negatively impact on birds  
78 and other wildlife through fear reactions in response to human presence (Dear, Guay, Robinson, &  
79 Weston, 2015; Frid & Dill, 2002; Lozano & Malo, 2013), presence of dogs (Lee, Marsden, Tatum-  
80 hume, & Brightsmith, 2017; Randler, 2006) or intensive pleasure boating (McFadden, Herrera, &  
81 Navedo, 2017; Wolter & Arlinghaus, 2003). Moreover, the use of gravel pit lakes through fisheries  
82 can modify the fish community (Lewin, Arlinghaus, & Mehner, 2006; Matern et al., in press), and  
83 short term increases of the biomass of stocked fish as well as natural fish predation can affect  
84 survival of tadpoles (Miró, Sabás, & Ventura, 2018; Shulse et al., 2010) or aquatic stages of  
85 invertebrates such as damselflies (Knorp & Dorn, 2016; Morin, 1984b). Certain species that are  
86 commonly stocked by anglers, such as common carp (*Cyprinus carpio*), may also modify the habitat  
87 for aquatic vegetation through suspension of sediments via benthivory and reduce species richness  
88 (Bajer et al., 2016). Recreational activities, such as pleasure boating, diving or angling, can also  
89 constitute vectors of the spread of non-native and potentially invasive species, hitchhiking via  
90 attachment to boats (Ros, Vazquez-Luis, & Guerra-Garcia, 2013) or recreational gear (Bacela-  
91 Spsychalska, Grabowski, Rewicz, Konopacka, & Wattier, 2013). Non-native fishes may also be  
92 introduced through deliberate or unintentional introductions via the common fisheries-management  
93 practice of fish stocking (Johnson, Arlinghaus, & Martinez, 2009; Zhao et al., 2016). Management and  
94 conservation of gravel pit lakes and other artificial waterbodies benefits from jointly considering the  
95 well-being aquatic recreation produces to humans, while balancing these benefits with the possible  
96 negative impacts that aquatic recreation can induce on aquatic and riparian biodiversity (Lemmens et  
97 al., 2013; Lemmens, Mergeay, Van Wichelen, De Meester, & Declerck, 2015).

98 Most gravel pit lakes in central Europe are used by recreational fisheries. Anglers are not only users  
99 but are at the same time stewards, and in some regions of the world also managers of fish  
100 populations and habitats of freshwater ecosystems (Arlinghaus et al., 2019, 2017; Daedlow, Beard, &  
101 Arlinghaus, 2011; Matern et al., in press). This particularly applies to Germany, where organizations  
102 of anglers, usually angling clubs and associations, are leaseholders or owners of fishing rights, and in  
103 this position are also legally entitled to manage fish stocks in gravel pits (Arlinghaus et al., 2017,  
104 2015; Emmrich et al., 2014; Matern et al., in press). Angler activities, both in terms of exploitation  
105 and fisheries and habitat management, are mainly directed at fish stocks, e.g., through practices as

106 fish stocking and fish harvesting. Therefore, key impacts of recreational fisheries can be expected at  
107 the fish stock level (Matern et al., in press). Angler-induced changes to fish biomass, fish size or fish  
108 community composition can have knock-on effects on submerged macrophytes (Bajer et al., 2016),  
109 amphibians (Hecnar & M'Closkey, 1997; Miró et al., 2018) and invertebrates such as dragonflies  
110 (Knorp & Dorn, 2016). In addition, anglers may modify littoral habitats through angling site  
111 constructions (O'Toole et al., 2009), thereby affecting plants (O'Toole et al., 2009), dragonflies (Z.  
112 Müller et al., 2003) or birds (Kaufmann, Hughes, Whittier, Bryce, & Paulsen, 2014). Certain anglers  
113 also contribute to eutrophication through ground-baiting (Niesar, Arlinghaus, Rennert, & Mehner,  
114 2004), thereby possibly affecting macrophytes, and they may disturb wildlife and birds due to  
115 extended human presence in littoral zones (Burger & Gochfeld, 1998; Frid & Dill, 2002; Knight,  
116 Anderson, & Marr, 1991; Le Corre, Gélinaud, & Brigand, 2009; Reichholf, 1988; Wichmann, 2010;  
117 Yalden, 1992). Lost fishing gear can also have lethal effects on birds (Franson et al., 2003; Heath,  
118 Dahlgren, Simon, & Brooks, 2017), for example when lost fishing leads are ingested by birds (Franson  
119 et al., 2003; Scheuhammer & Norris, 1996). Therefore, anglers can both be seen as stewards of  
120 aquatic ecosystems as well as a potential threat to certain aquatic taxa depending on the local  
121 angling intensity and other conditions.

122 Calls have been raised to either foster the presence of recreational fishers as stewards and managers  
123 of aquatic ecosystems (Danylchuk & Cooke, 2011; Fujitani, McFall, Randler, & Arlinghaus, 2017) or to  
124 spatio-temporally constrain or even ban recreational fisheries on selected waters or sites because  
125 anglers can be seen as a long-lasting, non-natural disturbance to aquatic ecosystems that may  
126 negatively affect natural processes and reduce local biodiversity, in particular bird populations  
127 (Bauer, Stark, & Frenzel, 1992; D. V Bell & Austin, 1985; Cooke, 1974; Erlinger, 1981; J. L. Newbrey,  
128 Bozek, & Niemuth, 2005; Park, Park, Sung, & Park, 2006; Reichholf, 1988; Wichmann, 2010). From a  
129 scientific perspective, spatial or temporal constraints on popular activities, such as recreational  
130 fishing, for the sake of conservation shall be informed by objective data that document relevant  
131 biodiversity impacts at the scale of entire ecosystems (Stock et al., 1994). However, much research  
132 on the biodiversity impacts of recreational fisheries is directed at single taxa (e.g., birds), tends to be  
133 focused on selected sites rather than entire ecosystems (e.g., Bauer et al., 1992; Erlinger, 1981;  
134 Reichholf, 1970; Wichmann, 2010), interprets biodiversity impacts of recreation without  
135 appropriately considering alternative non-recreation based impact sources (e.g., land use change;  
136 see Reichholf, 1988), suffers from lack of replication and controls (e.g., Cooke, 1974) or focuses on  
137 individual-level endpoints (e.g., flight initiation distance) that are not necessarily scaled up to  
138 population and species presence (e.g., de Boer & Longamane, 1996). However, it is the latter impacts  
139 at higher levels of biological organization (e.g., populations, species diversity) that are crucially  
140 important from a legal conservation perspective to justify management interventions and constraints  
141 on popular activities such as recreational fishing. For example, the German Nature Conservation Law

142 specifies in its clause 33 that human disturbances are prohibited in Natura-2000 conservation areas  
143 designed within the EU Habitats Directive (EU, 1992) when they are considered of having a  
144 substantial (“erheblich”) impact on conservation goals that relate to the presence of selected  
145 endangered species or sensitive habitats as specified in the appendices of the Directive. This clause  
146 can be interpreted that conservation action is warranted when listed species substantially change in  
147 abundance or species composition (e.g., recreation-induced faunal breaks) or even go extinct (e.g.,  
148 Fernández-Juricic, 2002) due to human interference. However, German nature conservation  
149 authorities regularly regulate and even entirely ban recreational fisheries in national conservation  
150 areas in the absence of local-level evidence for substantial impacts of recreational fishing on aquatic  
151 biodiversity or habitats, and these decisions and initiatives are fueling intensive conflicts with anglers  
152 and hunters on local scales (Arlinghaus, 2005).

153 Our objectives were to inform an ongoing conservation debate about the biodiversity impacts of  
154 recreational fisheries using gravel pit lakes as model system. In Germany, recreational fisheries are  
155 regularly constrained or even banned from a use of selected waterbodies (Landkreis Lüneburg, 2018;  
156 Landkreis Nienburg/Weser, 2018; H. Müller, 2012) based on the assumption that a fisheries use  
157 constitute a lasting disturbance for selected taxa and habitats that is of concern from a conservation  
158 perspective (Bauer et al., 1992; D. V Bell & Austin, 1985; Erlinger, 1981; Park et al., 2006; Reichholf,  
159 1988; Wichmann, 2010). Similarly, there is evidence that the use of recreational fisheries in gravel  
160 pits sometimes prohibited a priori during environmental impact assessments associated with  
161 approval processes to mine sand and gravel, based on the assumption that not using the gravel pit in  
162 construction in the future via angling is beneficial to nature conservation (H. Müller, 2012). To  
163 examine empirical data supporting these actions, we used a space-for-time substitution design  
164 studying the biodiversity in gravel pits that are both used and managed by recreational fisheries  
165 compared with the biodiversity in similarly structured lakes that are not used and managed by  
166 recreational fisheries. Our study was not meant to reveal the specific pathways by which anglers may  
167 impact on different taxa. Rather our work was meant to showcase the aggregate impact of  
168 recreational fisheries on biodiversity in gravel pit lakes. Specifically, we were interested in estimating  
169 the additive effect of the presence of recreational fisheries on the species richness, faunal  
170 composition and conservation value across a range of aquatic and riparian taxa. This research aim  
171 was chosen in light of the observation that recreational fisheries are often selectively constrained  
172 from selected conservation sites without necessarily constraining other recreational uses (Cooke,  
173 1974; Landkreis Lüneburg, 2018; Landkreis Nienburg/Weser, 2018). We tested the null hypothesis  
174 that recreational fisheries do not affect the species richness and conservation value across multiple  
175 taxa (odonata, amphibians, submerged and riparian vegetation, waterfowl and songbirds). Rejecting  
176 this statistical hypothesis would provide support for our research hypotheses that recreationally used

- 177 lakes would show reduced taxonomic richness and conservation value in disturbance-sensitive taxa  
178 such as birds, waterfowl or dragonflies.



## 2. Methods

### 1 *Study area and lake selection*

2 This study was conducted in Lower Saxony, Germany. Lower Saxony borders the North Sea (Figure 1)  
3 and has a total population of almost 8 million people at a population density of 167 inhabitants per  
4 km<sup>2</sup>. It has a total area of 47,710 km<sup>2</sup>, of which more than 50% of the land or in total 27,753 km<sup>2</sup> are  
5 constituted of agricultural land and 10,245 km<sup>2</sup> are composed of managed forests (Landesamt für  
6 Statistik Niedersachsen (LSN), 2018). The lowlands of Lower Saxony are intensively used for  
7 agriculture. Natural lentic water bodies are scarce. Out of a total of 35,048 hectares of standing  
8 water surface in Lower Saxony, artificial lakes (mainly ponds and gravel pit lakes) form 73% by  
9 surface; artificial lakes account for more than 99% of the lentic waterbodies Lower Saxony by  
10 number (Manfrin et al., unpublished data).

11 Our sample design was geared towards identifying intensively used gravel pit lakes of a water surface  
12 of 20 ha or smaller to control for area-species diversity relationships and thereby being better able to  
13 examine the specific impact of recreational fisheries. To identify angler-managed gravel pit lakes, we  
14 approached the Angler Association of Lower Saxony, the largest umbrella association of angling clubs  
15 in Lower Saxony. We contacted about 320 angling clubs of the association, asking for angling clubs  
16 who were interested in participating in a biodiversity study in gravel pits that were owned (and not  
17 only leased) by angling clubs. We focused on owned lakes, assuming these lakes would receive  
18 particularly high levels of use and shoreline development activities compared to just leased systems.  
19 It is reasonable to assume this is the case because humans would invest more intensively in  
20 development of a lake when it is owned, rather than only leased. We first selected N = 16 angler-  
21 managed lakes randomly from the angling clubs fulfilling our search criteria (Figure 1). Subsequently,  
22 we used local informants to identify gravel pits not managed by anglers in the least possible distance  
23 to a focal angler-managed lake, thereby creating a design that attempted to control for systematic  
24 land use and other differences unrelated to recreation activity. As the vast majority of lakes in Lower  
25 Saxony are run by angling clubs, the total set of unmanaged lakes was substantially smaller. We  
26 finally managed to identify 10 unmanaged lakes. Both managed and unmanaged lakes were  
27 distributed widely across Lower Saxony (Figure 1), with no obvious clustering of any of the two lake  
28 types. The key difference among the angler-managed and unmanaged lakes was the absence of legal  
29 recreational fisheries and any planned recreational fisheries activity at the unmanaged lakes. As  
30 uncontrolled recreation by both illegal anglers and other recreationists might still occur in all lake  
31 types, we assessed each lake for recreational use, but the underlying assumption was that angler-  
32 managed lakes would also be more attractive to other recreationists (e.g., walkers) as anglers  
33 develop shorelines, built parking lots, trails etc.

34 All angler-managed lakes were in private property by angler clubs and received regular angling  
35 activity as well as fisheries-management actions such as fish stocking (Table 1). By contrast, the  
36 unmanaged lakes were owned by private people or companies that neither fish nor engage in fish  
37 stocking (Table 1). All managed lakes, and a subset of 7 unmanaged lakes were assessed by  
38 electrofishing and gill-netting for their fish communities, revealing identical fish biomasses and  
39 abundances in both lakes types, but a substantially larger local species richness and a significantly  
40 larger presence of game fishes (particularly piscivorous fish and large-bodied cyprinids such as carp)  
41 in angler-managed lakes (Matern et al., in press). Thus, it can be expected that the predation  
42 pressure by gape-limited fish on large bodied prey (e.g., tadpoles, large larvae of dragonflies) would  
43 be stronger in angler-managed lakes as the fish community in unmanaged lakes encompassed mainly  
44 small-bodied zooplanktivorous fishes (Matern et al., in press) strongly constrained in their gape.

45 We assessed the environmental variables (including recreational intensity) and local biodiversity of a  
46 range of taxa (odonata, amphibians, waterfowl, songbirds and aquatic and riparian vegetation) in 20  
47 lakes (16 managed and 4 unmanaged) from 2016 to 2017, while 6 unmanaged lakes were sampled in  
48 2018. All lake-specific environmental factors (e.g., morphology, trophic state etc.) can be found in the  
49 supplementary material (Table S1 to S3).

#### 50 *Land use*

51 We assessed several indicators of land use and spatial arrangement for each lake. To that end,  
52 distances of each lake to next cities, villages, lakes, rivers etc. were calculated in google maps (©  
53 2017), and the shares of different land use categories within a distance of 100 m around each lake  
54 shoreline (buffer zone) were calculated in QGIS 3.4.1 with GRASS 7.4.2 using ATKIS® land use data  
55 with a 10 x 10 meter grid scale (© GeoBasis-DE/BKG 2013; AdV, 2006). We pooled categories of  
56 ATKIS®-objects to classes of (1) urban land use (all anthropogenic infrastructures like buildings,  
57 streets, railroad tracks etc.), (2) agricultural land use (all arable land like fields and orchards but not  
58 meadows or pastures), (3) forest, (4) wetland (e.g., swamp lands, fen, peat lands), (5) excavation  
59 (e.g., open pit mine), (6) water surface (e.g., lakes, rivers, channels) and (7) other land use (not fitting  
60 in previous classes like succession areas, grass land, boulder sites etc.). With this classification we  
61 tried to account for all impacts on and habitat needs of our studied taxa.

#### 62 *Recreational use intensity*

63 We assessed several indicators of recreational use intensity, enumerating the type and number of  
64 recreationists during each site visit (between 6 and 9 visits per lake) as well as using indirect  
65 measures of use intensity. The indirect measures encompassed measures of accessibility and litter as  
66 follows: every lake was walked around with a measuring wheel (NESTLE-Cross-country measuring  
67 wheel – Model No. 12015001, with 2m circumference and 0.1% accuracy), measuring the distances

68 of all trails and paths at the lake. This was summed up and then put in relation to the shoreline  
69 length. Angling sites and open spaces along the shoreline were counted and all litter encountered  
70 was assigned to one of two categories, (1) angling related (e.g., lead weight, nylon line, artificial bait)  
71 or (2) not angling related (e.g., plastic packaging, beer bottles, cigarettes), and counted, too.

72 Figure 1: Map of study area in Lower Saxony (Germany)

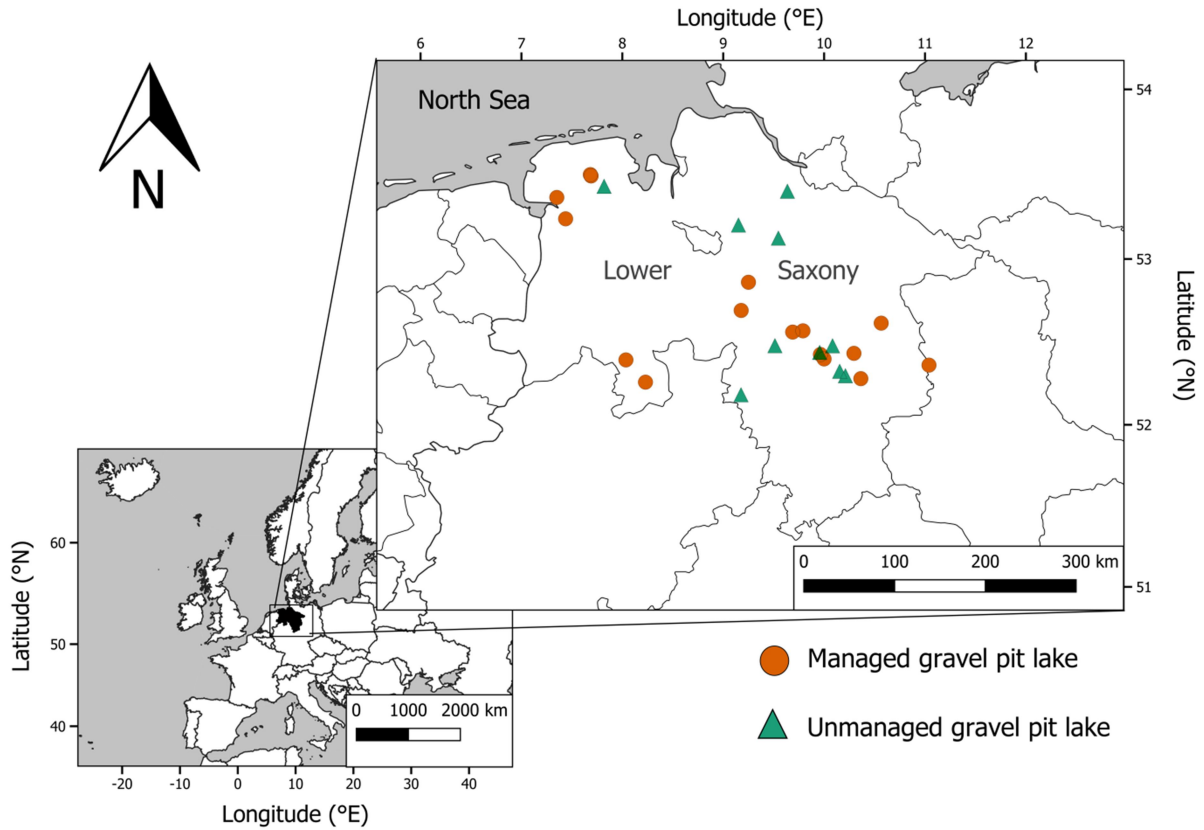

73

#### 74 *Morphology*

75 Every lake was mapped with a SIMRAD NSS7 evo2 echo sounder together with a Lawrence TotalScan  
76 transducer. These were mounted on a boat with an electric motor, driving at 3 – 4 km/h along the  
77 lake on transects 25 – 45 m apart from each other depending on lake size and lake depth. The echo  
78 sounding data was stored in the Lawrence format .slg2 and processed by BioBase (Navico). The post-  
79 processed raw data (depth and gps-position per ping) were used to calculate depth contour maps  
80 using ordinary kriging with the gstat-package in R (Gräler, Pebesma, & Heuvelink, 2016; Pebesma,  
81 2004; R Core Team, 2013). The contour maps were used to extract maximum depth and also used for  
82 the calculation of the relative depth ratio (see Damnjanović et al., 2018). Shoreline length and lake  
83 area were estimated in QGIS 3.4.1, and the shoreline development factor (Osgood, 2005) was  
84 calculated with this data.

85 *Water chemistry and nutrient levels*

86 In spring during overturn, epilimnic water samples were taken for analyzing total phosphorus  
87 concentrations (TP), total organic carbon (TOC), ammonium and nitrate concentrations (NH<sub>4</sub>, NO<sub>3</sub>)  
88 and chlorophyll a (Chl-a) as a measure of algal biomass. The TP was determined using the ammonium  
89 molybdate spectrometric method (EN ISO 6878, 2004; Murphy & Riley, 1962), TOC was determined  
90 with a nondispersive infrared detector (NDIR) after combustion (DIN EN 1484, 1997), ammonium and  
91 nitrate was assessed using the spectrometric continuous flow analysis (DIN EN ISO 13395, 1996; EN  
92 ISO 11732, 2005), and Chl-a was enumerated using high performance liquid chromatography (HPLC)  
93 (Mantoura & Llewellyn, 1983; S. W. Wright, 1991). The lake's conductivity and pH were measured  
94 with a WTW Multi 350i sensor (WTW GmbH, Weilheim, Germany). Additionally, water turbidity was  
95 assessed using a standard Secchi-disk.

96 *Littoral and riparian habitat assessment*

97 As measures of littoral and riparian habitat quality, the riparian vegetation and dead woody habitat  
98 was assessed using a plot design evenly spaced throughout the shoreline following Kaufmann &  
99 Whittier (1997). To that end, transects (= macrophyte transects, see next section) were placed  
100 perpendicular to and along the shore line with a 15 x 15 meter riparian plot at the shore (see Figure  
101 2). Each littoral transect was 4 meter wide and at maximum 10 meter long or shorter if the maximum  
102 sampling depth of 3 meter was reached. In each transect all dead wood structure was counted and  
103 assigned to one of two categories: (1) simple dead wood (bulk diameter < 5 cm and length < 50 cm,  
104 no and very low complexity), or (2) coarse woody structure (bulk diameter > 5 cm and/or length > 50,  
105 any degree of complexity) following the criteria of DeBoom & Wahl (2013), Newbrey et al. (2005) and  
106 Mallory et al. (2000). Also, length and bulk diameter was measured for all dead wood structure,  
107 additionally width and height was measured for coarse woody structure. From these measurements,  
108 the volume for each dead wood structure was calculated using the formula for a cylinder as  
109 reference for simple dead wood and the formula for an ellipsoid as reference for coarse woody  
110 structure. Riparian habitats (e.g., trees, tall herbs, reed) were evaluated in the plots at the shore  
111 following the protocol of Kaufmann & Whittier (1997) where "0" means absent, "1" means sparse  
112 (<10% coverage), "2" means moderate (10-40% coverage), "3" means dominant (40-75% coverage),  
113 and "4" means very dominant (>75% coverage) in the plot.

114 Figure 2: Habitat assessment plot, modified after Kaufmann & Whittier (1997) and Newbrey et al.  
115 (2005).

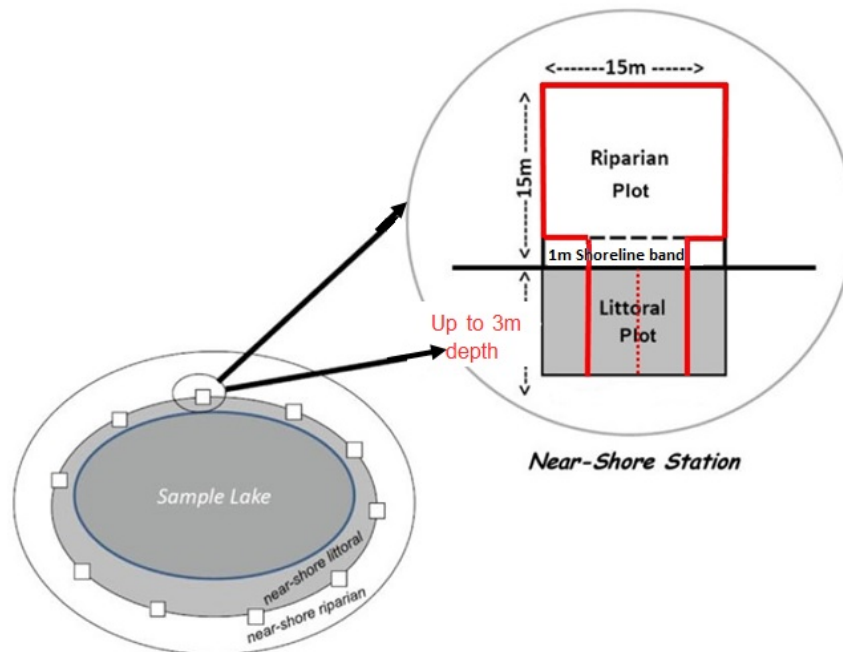

116

### 117 *Submerged macrophytes*

118 All lakes were sampled for submerged macrophyte extension and diversity between late June and  
119 late August, following the sampling protocol of Schaumburg et al. (2014). Every lake was scuba dived  
120 and snorkeled along transects extending from the shoreline (depth = 0m) towards the lake center  
121 perpendicular to the shoreline until the deepest point of macrophyte growth was reached. The  
122 position of the first sampled transect was randomly chosen and all other transects were then spaced  
123 evenly along the shoreline at distances among 80 – 150 m depending on lake size. This summed up to  
124 4 – 20 transects per lake. Along each transect, in every depth stratum (0-1 m, 1-2 m, 2-4 m, 4-6 m)  
125 the dominance of each macrophyte species was estimated according to the Kohler scale: “0 –  
126 absent”, “1 – very rare”, “2 – rare”, “3 – widespread”, “4 – common”, “5 – very common” (Kohler,  
127 1978; Van de Weyer, 2003). No macrophytes were found in areas deeper than 6 m. The species were  
128 identified under water or, if not possible, samples were taken into laboratory and identified under  
129 binoculars following Van de Weyer & Schmitt (2011). Macrophyte dominance of each species was  
130 transformed into percent coverage for each transect (Van der Maarel, 1979). The average coverage  
131 per stratum was extrapolated to its respective total lake area from contour maps. Afterwards, the  
132 total macrophyte coverage for littoral zone was calculated using the extrapolated coverage from  
133 strata between 0 and 3 meter depth. The regional species pool was estimated from the red lists of  
134 Lower Saxony in combination with the expected species for gravel pit lakes following the EU habitat  
135 directive (Garve, 2004; Korsch, Doege, Raabe, & van de Weyer, 2013; LÖBF NRW, 2004).

136 Table 1: Descriptors of gravel pits in Lower Saxony. Trophic state was determined using Riedmüller, Hoehn, & Mischke (2013).

| Lake name           | Lake type | Management interventions                                                   | Recreationists identified during on-site visits           | Trophic state | End of dredging |
|---------------------|-----------|----------------------------------------------------------------------------|-----------------------------------------------------------|---------------|-----------------|
| Chodhemster Kolk    | Managed   | recreational fisheries, regular stocking                                   | Anglers, dog walkers                                      | Mesotrophic   | 1971            |
| Collrunge           | Managed   | recreational fisheries, regular stocking                                   | Anglers, dog walkers                                      | Mesotrophic   | 1982            |
| Donner Kiesgrube 3  | Managed   | recreational fisheries, regular stocking                                   | Anglers                                                   | Eutrophic     | 2000            |
| Kiesteich Brelingen | Managed   | recreational fisheries, regular stocking                                   | Anglers, dog walkers                                      | Mesotrophic   | 1999            |
| Kolshorner Teich    | Managed   | recreational fisheries, regular stocking                                   | Anglers, horses                                           | Mesotrophic   | 1980            |
| Linner See          | Managed   | recreational fisheries, regular stocking                                   | Anglers                                                   | Mesotrophic   | 2000            |
| Meitzer See         | Managed   | recreational fisheries, regular stocking                                   | Anglers, dog walkers, swimmers                            | Oligotrophic  | 2006            |
| Neumanns Kuhle      | Managed   | recreational fisheries, regular stocking                                   | Anglers, dog walkers                                      | Polytrophic   | 1970            |
| Plockhorst          | Managed   | recreational fisheries, regular stocking                                   | Anglers, dog walkers, horses                              | Eutrophic     | 1998            |
| Saalsdorf           | Managed   | recreational fisheries, regular stocking                                   | Anglers, dog walkers                                      | Mesotrophic   | 1995            |
| Schleptruper See    | Managed   | recreational fisheries, regular stocking                                   | Anglers, dog walkers                                      | Mesotrophic   | 1965            |
| Stedorfer Baggersee | Managed   | recreational fisheries, regular stocking                                   | Anglers, dog walkers                                      | Eutrophic     | 1983            |
| Steinwedeler Teich  | Managed   | recreational fisheries, regular stocking                                   | Anglers, dog walkers, cyclists                            | Mesotrophic   | 1978            |
| Wahle               | Managed   | recreational fisheries, regular stocking                                   | Anglers, dog walkers                                      | Mesotrophic   | 1990            |
| Weidekampsee        | Managed   | recreational fisheries, regular stocking                                   | Anglers                                                   | Mesotrophic   | 1994            |
| Wiesedermeer        | Managed   | recreational fisheries, regular stocking                                   | Anglers, dog walkers                                      | Mesotrophic   | 1990            |
| Bülstedt            | Unmanaged | Nature conservation                                                        | Birdwatchers                                              | Polytrophic   | 1991            |
| Lohmoor             | Unmanaged | Nature conservation                                                        | Birdwatchers                                              | Eutrophic     | 1991            |
| Goldbeck            | Unmanaged | Private (no management)                                                    | Owner/friends, horses, swimmers, anglers                  | Eutrophic     | 1992            |
| Handorf             | Unmanaged | Private (no management)                                                    | Horses, dogs (commercial)                                 | Eutrophic     | 2004            |
| Hänigsen            | Unmanaged | Private (no management)                                                    | Swimmers, dog walkers, anglers, campfires, dumping ground | Mesotrophic   | 2011            |
| Hopels              | Unmanaged | Angling club, not stocked or managed at time of assessment                 | Swimmers, dog walkers                                     | Mesotrophic   | 1998            |
| Pfütze              | Unmanaged | Private (no management)                                                    | Dog walkers, canoes, swimmers, cyclists                   | Mesotrophic   | 2000            |
| Schwicheldt         | Unmanaged | Private (no management)                                                    | Owner/hunter, dog walkers                                 | Mesotrophic   | 2007            |
| Heeßel              | Unmanaged | Business property (no management)                                          | No                                                        | Eutrophic     | 1963            |
| Xella               | Unmanaged | Business property; Endangered crayfish ( <i>Astacus astacus</i> ) breeding | No (restricted access)                                    | Mesotrophic   | 1975            |

137 *Amphibians*

138 Amphibians were sampled during the mating-seasons (from March to May). Every lake was sampled  
139 twice: (1) during the day with an inflatable boat driving slowly along the shore searching for adults,  
140 egg-balls (frogs) and egg-lines (toads), (2) after sunset by feet around the lake searching for calling  
141 adults. Each observation (adult or eggs) was marked with a GPS (Garmin Oregon 600), identified in  
142 the field or photographed for later identification following Schlüpmann (2005), and numbers were  
143 recorded (adults) or estimated (eggs), assuming 700 to 1500 eggs per egg-ball (frogs) or 10,000 eggs  
144 per (100% covered) m<sup>2</sup> of egg-line-assemblages (toads). The regional species pool was estimated  
145 from the red list of Lower Saxony in combination with their expected distribution (BfN, 2012; Kühnel,  
146 Geiger, Laufer, Podlucky, & Schlüpmann, 2009).

147 *Odonata*

148 Dragonflies and damselflies were sampled once per lake between early- and mid-summer. At each  
149 lake the whole shoreline was intensively searched during the mid-day. Sitting or flushing images were  
150 caught with a hand net (butterfly net, 0.2 mm mesh size, bioform), identified using Lehmann & Nüss  
151 (2015), and released without being harmed. The regional species pool was estimated from the red  
152 list of Lower Saxony in combination with their expected habitat preferences (Altmüller & Clausnitzer,  
153 2010; Hein, 2018).

154 *Waterfowl and songbirds*

155 Waterfowl were identified following Dierschke (2016), counted and protocolled at every visit of each  
156 lake (between 6 and 9 visits per lake). Songbirds were sampled once per lake between early- and  
157 mid-summer using 2-minutes audio-recordings (ZOOM Handy Recorder H2, Surround 4-Channel  
158 setting, 44.1kHz sampling frequency, 16 bit quantification) at sampling points distributed along the  
159 shoreline, placed 200 m apart around the whole shoreline, assuming each sampling point covers a  
160 radius of 100 m. Sampling points were marked with GPS. The audio-records were later analyzed in  
161 the lab, and singing species were identified using reference audio samples from two websites  
162 ([www.deutsche-vogelstimmen.de](http://www.deutsche-vogelstimmen.de); [www.vogelstimmen-wehr.de](http://www.vogelstimmen-wehr.de)) and a smart phone application  
163 (BirdUp - Automatic Birdsong Recognition, developed by Jonathan Burn, Version 2018). The regional  
164 species pools for waterfowl and songbirds were estimated from the red list of Lower Saxony (Krüger  
165 & Nipkow, 2015).

166 *Riparian vegetation*

167 All lakes were sampled for riparian vegetation in May. At each lake, 4 transects were sampled, one at  
168 each cardinal direction of the lake. Each transect was 100 m long and contained 5 evenly spaced (20  
169 m distance) 1 m<sup>2</sup>-plots. Trees (>3 m high) were identified (using Spohn, Golte-Bechtle, & Spohn,  
170 2015) and counted along each transect. If species were not obvious an application for smart phones  
171 called Pl@ntNet was used (Goëau et al., 2014). Herbs were identified following the same keys  
172 (Goëau et al., 2014; Spohn et al., 2015) as far as possible in each plot and abundance classes (“r” = 1  
173 individual in plot, “+” = 2 – 5 individuals in plot but < 5 % coverage, “1” = 6 – 50 individuals in plot but  
174 < 5 % coverage, “2m” = > 50 individuals in plot but < 5 % coverage, “2a” = 5 – 15 % coverage, “2b” =  
175 16 – 25 % coverage, “3” = 26 – 50 % coverage, “4” = 51 – 75 % coverage, “5” = 76 – 100 % coverage;  
176 see Braun-Blanquet, 1964) were estimated for each species, genus or family (depending on  
177 identification accuracy, see Table S7). The regional species pool was estimated from the red lists of  
178 Lower Saxony in combination with the expected species for gravel pit lakes following the EU habitat  
179 directive (Garve, 2004; LÖBF NRW, 2004).

180 *Diversity metrics*

181 We used presence-absence data and estimated species richness by taxon. Additionally, a taxon-  
182 specific conservation value was calculated following Oertli et al. (2002). To that end, each identified  
183 species was assigned a threat status according to its most threatened status on any of the following 4  
184 lists: regional red lists of Lower Saxony (Altmüller & Clausnitzer, 2010; Garve, 2004; Korsch et al.,  
185 2013; Krüger & Nipkow, 2015; Podloucky & Fischer, 1994), national red lists of Germany (Grünberg et  
186 al., 2015; Korsch et al., 2013; Kühnel et al., 2009; Ludwig & Schnittler, 1996; Ott et al., 2015), the  
187 international red list (IUCN, 2018) and the annex lists of the European Union (EU) Habitats Directive  
188 and the EU Birds Directive (EU, 1992; EU, 2009). For each species, the highest threat status  
189 mentioned on any of these four lists was used. The conservation value  $c$  for a species of the least  
190 threatened rank (not listed, very common, not threatened) was  $c_0 = 2^0 = 1$ , and every ascending  
191 threat status was given an exponentially larger conservation value (i.e., weight)  $c_r = 2^r$  as shown in  
192 Table 2. The final taxon-specific conservation value ( $CV$ ) for each lake was calculated by taxon as the  
193 sum of all values ( $c$ ) for every observed species ( $s_1, s_2, s_3, \dots, s_n$ ) divided by the total number of  
194 observed species ( $n$ ):

$$CV = \frac{1}{n} * \sum_{s_i=1}^{s_n} c_{s_i}$$



195 Table 2: Ranking of Red List categories used for calculation of conservation values.

| IUCN Red List category     | EU Directives                          | Red List categories of Germany and Lower Saxony | Rank <i>r</i> | Weight <i>c</i> |
|----------------------------|----------------------------------------|-------------------------------------------------|---------------|-----------------|
| EX – extinct               |                                        | 0 – extinct                                     | 5             | 32              |
| EW – extinct in the wild   |                                        |                                                 |               |                 |
| CR – critically endangered | Annex I (Birds)<br>Annex IV (Habitats) | 1 – critically endangered<br>2 – endangered     | 4             | 16              |
| EN – endangered            | Annex II (Habitats)                    | 3 – vulnerable<br>G – intermediate              | 3             | 8               |
| VU – vulnerable            |                                        | R – rare                                        | 2             | 4               |
| NT – near threatened       | Annex V (Habitats)                     | V – near threatened                             | 1             | 2               |
| LC – least concern         | Annex II and III                       | * – least concern                               | 0             | 1               |
| DD – data deficient        | (Birds)                                | -- data deficient                               |               |                 |

196

197 *Statistical analysis*

198 Mean/median differences among lake types (managed or unmanaged gravel pits) were calculated for  
 199 all environmental variables and taxon-specific biodiversity variables (species richness and  
 200 conservation value) with Student’s t-tests (variance homogeneity) or Welch-F-test (variance  
 201 heterogeneity) when the variances were normally distributed (Shapiro-Wilk-test), otherwise a Mann-  
 202 Whitney-U-test was used. P-values were Sidak-corrected (Šidák, 1967) due to multiple comparisons.  
 203 To estimate faunal breaks and turn over rates, the pooled species inventory by lake type was used  
 204 and two indices were calculated: (1) the Sørensen index (Sørensen, 1948) as a measure of  
 205 community similarity and (2) the richness-based species exchange ratio  $SE_{R_r}$  (Hillebrand et al., 2018)  
 206 as a measure of species turnover. The Sørensen index ranges from 0 (here: no species in common) to  
 207 1 (here: all species the same) and is calculated as  $\frac{2a}{2a+b+c}$ , with *a* being the number of shared species  
 208 and *b* and *c* being the numbers of unique species to the two lake types. The  $SE_{R_r}$  also ranges from 0  
 209 (here: all species the same) to 1 (here: no species in common) and is calculated as  $\frac{b+c}{a+b+c}$ . Following  
 210 Matthews (1986), we interpreted faunal breaks among lake types when the Sørensen index was <  
 211 0.5, and we considered the species exchange among lake types to be substantial when the  $SE_{R_r}$  index  
 212 was > 0.5. We also estimated species accumulation curves visualized using the vegan-package in R  
 213 (Oksanen et al., 2013; R Core Team, 2013). The species assemblages of each taxon expected for  
 214 increasing numbers of lakes (species accumulation curves, see Gotelli & Colwell, 2001) for each lake  
 215 type were compared among lake types using the chi squared ( $\chi^2$ ) test developed by Mao & Li (2009).  
 216 These analyses were performed in R using the vegan-package (Oksanen et al., 2013; R Core Team,  
 217 2013).

218 As different environmental variables and the diversity metrics of the different taxa could co-vary, we  
219 further conducted multivariate tests of differences among lake types in terms of the environment as  
220 well as taxon-specific biodiversity using Redundancy Analysis (RDA; Legendre & Legendre, 2012),  
221 carried out after first conducting standard Principal Component Analyses with no rotations applied  
222 (PCA; Mardia, Kent, & Bibby, 1979). Environmental predictors of species richness and conservation  
223 value were evaluated with a forward selection process in a RDA (Blanchet, Legendre, & Borcard,  
224 2008) after removing highly correlated variables using the variance inflation factor (VIF; Neter,  
225 Kutner, Nachtsheim, & Wasserman, 1996). Data for PCAs and RDAs was scaled and centered (z-  
226 transformation) and the amount of variance explained by variables was expressed using the adjusted  
227 coefficient of multiple determination ( $R^2_a$ ; Ezekiel, 1930). Significance was assessed using a 5 %  
228 rejection level ( $p \leq 0.05$ ). Because our sample size of lakes was moderate, we also interpreted p-  
229 values of  $0.05 < p \leq 0.10$  as a trend.

### 3. Results

#### 1 *Environmental variables of managed and unmanaged gravel pit lakes*

2 The studied lakes were overwhelmingly small (mean  $\pm$  SD, area  $6.7 \pm 5.1$  ha, range 0.9 – 19.6 ha),  
3 shallow (maximum depth  $9.7 \pm 5.1$  m, range 1.6 – 24.1 m) and mesotrophic (TP  $26.3 \pm 30.4$   $\mu\text{g/l}$ ,  
4 range 8 - 160  $\mu\text{g/l}$ ) with moderate visibility (Secchi depth  $2.4 \pm 1.4$  m, range 0.5 – 5.5 m, Table S1).  
5 The land use in a 100 m buffer around the lake was characterized by low degree of forestation (mean  
6 percentage of forests in buffer zone of  $16 \pm 21$  %, range 0 – 68 %, Table S3) and high degree of  
7 agricultural land use (mean percentage of agricultural land use in buffer zone of  $27 \pm 22$  %, range 2.4  
8 – 79 %, Table S3). Lakes were closely situated to human settlements (mean distance to next village  
9  $618.3 \pm 523.1$  m, range 20 – 1810 m, Table S4) and were on average a few km away from other water  
10 bodies (mean distance to next water in general  $55.8 \pm 84.7$  m, range 1 – 305 m, Table S3). Most of  
11 the lakes were regularly used by recreational angling (legal only in managed lakes) and other  
12 recreational activities and were generally accessible through paths, parking lots and trails (Table S4).  
13 On average, managed and unmanaged gravel pits did not differ in individual morphological and  
14 trophic state-related variables as well as indicators of proximity to other water bodies, urbanization  
15 or human settlements (Table 3, Table 4). Both lake types were also similar in terms of the average  
16 volume of littoral dead wood, reed extension and riparian vegetation along the shoreline (Table 3).  
17 Also their age was not statistically different (Table 3). Lakes were similar in terms of the average  
18 agricultural land in a 100 buffer around the lake, but the buffer zone tend to be a bit more forested  
19 in managed lakes compared to unmanaged ones (Table 4). However, a statistical trend showed  
20 managed lakes to exhibit a greater average submerged macrophyte coverage along the littoral zone  
21 compared to unmanaged gravel pits (Table 3). Strong differences among lake types were also  
22 detected in several variables of recreational use intensity, with managed lakes attracting increased  
23 use of both anglers and non-angling related recreational activities (e.g., swimmers, dog walkers) than  
24 unmanaged lakes (Table 4). Managed lakes also exhibited a significantly greater average extension of  
25 trails (relative to shoreline length) and larger accessibility of the littoral zone to recreational activities  
26 compared to unmanaged gravel pits (Table 4).

27 The multivariate RDA confirmed no significant differences among managed and unmanaged lakes in  
28 the collective class of variables representing morphology ( $R^2_{\text{adj.}} = -0.005$ ,  $F = 0.86$ ,  $p = 0.470$ ), trophic  
29 state ( $R^2_{\text{adj.}} = -0.006$ ,  $F = 0.86$ ,  $p = 0.544$ ), proximity to alternative water bodies ( $R^2_{\text{adj.}} = -0.023$ ,  $F =$   
30  $0.45$ ,  $p = 0.867$ ) and general human influence in relation to urbanization and proximity to human  
31 settlements ( $R^2_{\text{adj.}} = 0.025$ ,  $F = 1.64$ ,  $p = 0.173$ , for an example of overlapping lake types in the  
32 ordination in relation to human influence, see Figure 3a, all PCA results of environmental variables  
33 are in Table S5, Table S6). By contrast, the habitat structure differed among managed and unmanaged

34 lakes along the first principal component axis (Dim 1) representing a vegetation gradient (Table S5),  
35 with managed lakes being more vegetated both in the riparian zone as well as in the littoral zone  
36 compared to unmanaged lakes (Figure 3b,  $R^2_{adj.} = 0.056$ ,  $F = 2.48$ ,  $p = 0.022$ ). There was a statistical  
37 trend of unmanaged lakes differing from managed lakes in relation to an agricultural gradient in a  
38 buffer of 100 m around the lake shoreline, with unmanaged lakes being situated in a zone of greater  
39 agricultural use and less forests ( $R^2_{adj.} = 0.045$ ,  $F = 2.19$ ,  $p = 0.089$ , Figure 3c).

40 As expected, the strongest separation of both lakes types was revealed in relation to the first PC axis  
41 representing the intensity of recreational use by both angling and non-angling recreational activities  
42 and general accessibility through trails around the lake; here, managed lakes exhibited a substantially  
43 greater recreational use intensity and greater accessibility to humans than unmanaged lakes (Figure  
44 3d,  $R^2_{adj.} = 0.16$ ,  $F = 5.76$ ,  $p < 0.001$ ). Note that there was less differentiation among lake types along  
45 the second PC axis of the recreational variables, which represented an index of accessibility difficulty  
46 (Table S6, Figure 3d). Note also that the PC of recreational variables did not cleanly separate lakes  
47 with high angler use from lakes with high use of other recreationists: lakes with plenty of anglers  
48 were also regularly used by other recreationists (Table S6). Finally, although unmanaged lakes were  
49 not managed by recreational fisheries, a small degree of illegal fishing was also detected at some  
50 unmanaged lakes (Table S4), yet the general recreational intensity was substantially smaller at  
51 unmanaged compared to angler-managed lakes. In fact, the recreational intensity variable was found  
52 to be the most consistent and strongest environmental differentiation among the two lake types we  
53 examined.

54 Table 3: Univariate comparison of managed and unmanaged gravel pit lakes for each environmental  
 55 variable separately. P-values are Sidak-corrected to account for multiple comparisons within classes  
 56 of environmental variables (morphology, trophic state etc.), **significant ones ( $p < 0.05$ ) are bolded**,  
 57 *statistical trends ( $p < 0.1$ ) are italic.*

| Class             | Environmental variable<br>(abbreviation)                                    | mean $\pm$ standard deviation<br>(range) |                                    | Test          | Statistics |              |
|-------------------|-----------------------------------------------------------------------------|------------------------------------------|------------------------------------|---------------|------------|--------------|
|                   |                                                                             | Managed<br>(N = 16)                      | Unmanaged<br>(N = 10)              |               | Statistic  | p-value      |
| Morphology        | maximum depth<br>in m (MaxDep)                                              | 9.7 $\pm$ 4.9<br>(2.8-23.5)              | 9.5 $\pm$ 6.0<br>(1.1-23.0)        | U-test        | W = 89     | 0.986        |
|                   | lake area in ha<br>(LArea)                                                  | 7.4 $\pm$ 5.6<br>(1.0-19.6)              | 4.9 $\pm$ 4.2<br>(0.9-13.6)        | U-test        | W = 105    | 0.592        |
|                   | shoreline development<br>factor (SDF)                                       | 1.5 $\pm$ 0.3<br>(1.1-2.2)               | 1.6 $\pm$ 0.3<br>(1.3-2.2)         | t-test        | t = -1.0   | 0.824        |
|                   | relative depth ratio<br>(RelDepR)                                           | 0.04 $\pm$ 0.01<br>(0.02-0.07)           | 0.04 $\pm$ 0.02<br>(0.01-0.07)     | t-test        | t = -1.1   | 0.754        |
| Trophic state     | total phosphorus in $\mu\text{g/l}$<br>(TP)                                 | 25.7 $\pm$ 36.5<br>(8-160)               | 27.2 $\pm$ 20.9<br>(12-72)         | U-test        | W = 63.5   | 0.983        |
|                   | total organic carbon<br>in mg/l (TOC)                                       | 6.6 $\pm$ 2.8<br>(2.5-13)                | 6.0 $\pm$ 2.5<br>(2.9-12.4)        | U-test        | W = 93     | 0.997        |
|                   | mean chlorophyll a<br>in $\mu\text{g/l}$ (CHLa)                             | 11.6 $\pm$ 15.9<br>(2.05-65.3)           | 21.2 $\pm$ 26.1<br>(2.6-90.6)      | U-test        | W = 53     | 0.765        |
|                   | Secchi depth in m<br>(Secchi)                                               | 2.6 $\pm$ 1.5<br>(0.5-5.5)               | 2.0 $\pm$ 1.1<br>(0.5-4.5)         | t-test        | t = 0.9    | 0.972        |
|                   | ammonium in $\mu\text{g/l}$<br>(NH4)                                        | 56.9 $\pm$ 71.2<br>(15.0-240.0)          | 84.0 $\pm$ 164.8<br>(15.0-550.0)   | U-test        | W = 75     | 1.000        |
|                   | nitrate in $\mu\text{g/l}$<br>(NO3)                                         | 283.8 $\pm$ 380.4<br>(5.0-1040.0)        | 733.0 $\pm$ 984.1<br>(5.0-2940.0)  | U-test        | W = 50     | 0.604        |
|                   | conductivity in mS/cm<br>(Con)                                              | 0.5 $\pm$ 0.2<br>(0.1-0.7)               | 0.5 $\pm$ 0.3<br>(0.2-1.0)         | t-test        | t = -0.3   | 1.000        |
|                   | pH value<br>(pH)                                                            | 7.9 $\pm$ 0.5<br>(6.7-9)                 | 8.1 $\pm$ 0.5<br>(7.5-9.2)         | t-test        | t = -1     | 0.967        |
| Habitat structure | volume-% of simple dead wood<br>(SDW_Vol)                                   | 0.005 $\pm$ 0.009<br>(0-0.035)           | 0.008 $\pm$ 0.010<br>(0.001-0.028) | U-test        | W = 65.5   | 0.973        |
|                   | volume-% of coarse woody structure<br>(CWS_Vol)                             | 1.5 $\pm$ 1.4<br>(0.02-5.6)              | 1.7 $\pm$ 2.0<br>(0.02-6.2)        | U-test        | W = 86.5   | 1.000        |
|                   | mean riparian tree coverage on an<br>ordinal scale from 0 to 4 (Rip_Trees)  | 1.0 $\pm$ 0.2<br>(0.4-1.5)               | 0.9 $\pm$ 0.3<br>(0.4-1.2)         | t-test        | t = 0.9    | 0.942        |
|                   | mean riparian reed coverage on an<br>ordinal scale from 0 to 4 (Reed)       | 1.3 $\pm$ 0.9<br>(0-2.5)                 | 0.8 $\pm$ 0.7<br>(0-1.7)           | t-test        | t = 1.25   | 0.779        |
|                   | mean riparian herb coverage on an<br>ordinal scale from 0 to 4 (Herb)       | 1.7 $\pm$ 0.4<br>(1.1-3.0)               | 1.0 $\pm$ 0.7<br>(0.1-1.9)         | U-test        | W = 118    | 0.225        |
|                   | <i>submerged macrophyte coverage in<br/>the littoral zone in % (MP_Cov)</i> | 39.3 $\pm$ 19.9<br>(12.5-82.3)           | 21.1 $\pm$ 27.5<br>(0-85.2)        | <i>U-test</i> | W = 126    | <i>0.083</i> |
| Age               | Lake age in years by 2017<br>(Age)                                          | 29.4 $\pm$ 12.4<br>(11-52)               | 23.8 $\pm$ 14.7<br>(6-54)          | t-test        | t = 1.05   | 0.303        |

58

59 Table 4: Univariate comparison of managed and unmanaged gravel pit lakes for each environmental  
 60 variable separately. P-values are Sidak-corrected to account for multiple comparisons within classes  
 61 of environmental variables (land use, recreational use etc.), **significant ones ( $p < 0.05$ ) are bolded**,  
 62 *statistical trends ( $p < 0.1$ ) are italic.*

| Class            | Environmental variable<br>(abbreviation)                                    | mean $\pm$ standard deviation<br>(range)         |                                                   | Statistics    |                  |              |
|------------------|-----------------------------------------------------------------------------|--------------------------------------------------|---------------------------------------------------|---------------|------------------|--------------|
|                  |                                                                             | Managed<br>(N = 16)                              | Unmanaged<br>(N = 10)                             | Test          | Statistic        | p-value      |
| Land use         | excavation in 100m-buffer<br>in % (Excav)                                   | 4.8 $\pm$ 7.2<br>(0-21.3)                        | 9.4 $\pm$ 14.6<br>(0-39.0)                        | U-test        | W = 63           | 0.718        |
|                  | agriculture in 100m-buffer<br>in % (Agric)                                  | 22.8 $\pm$ 19.9<br>(2.4-55.9)                    | 33.8 $\pm$ 25.4<br>(3.5-79.0)                     | U-test        | W = 58           | 0.598        |
|                  | forest in 100m-buffer<br>in % (Forest)                                      | 22.0 $\pm$ 25.1<br>(0-72.6)                      | 5.6 $\pm$ 6.0<br>(0-15.5)                         | U-test        | W = 118          | 0.132        |
| Water            | wetland in 100m-buffer in %<br>(Wetland)                                    | 0.9 $\pm$ 3.6<br>(0-14.4)                        | 5.1 $\pm$ 14.1<br>(0-45.1)                        | U-test        | W = 61.5         | 0.504        |
|                  | water surface in 100m-<br>buffer in % (Water)                               | 9.7 $\pm$ 12.5<br>(0.9-50.4)                     | 8.7 $\pm$ 8.8<br>(0.5-30.1)                       | U-test        | W = 80           | 1.000        |
|                  | distance to next Lake<br>in m (DistLake)                                    | 164.1 $\pm$ 236.4<br>(5-850)                     | 264.1 $\pm$ 440.6<br>(1-1280)                     | U-test        | W = 87           | 0.999        |
|                  | distance to next river<br>in m (DistRiver)                                  | 5226.1 $\pm$ 9805.2<br>(25-29,900)               | 3999.5 $\pm$ 9841.6<br>(220-31,920)               | U-test        | W = 92           | 0.980        |
|                  | distance to next canal in m<br>(DistChannel)                                | 312.4 $\pm$ 462.3<br>(1-1630)                    | 224.5 $\pm$ 367.9<br>(5-1180)                     | U-test        | W = 84           | 1.000        |
| Human influence  | distance to next road<br>in m (DistRoad)                                    | 265.3 $\pm$ 314.4<br>(15-1010)                   | 558.0 $\pm$ 510.1<br>(30-1530)                    | U-test        | W = 50.5         | 0.416        |
|                  | urban area in 100m-buffer<br>in % (Urban)                                   | 27.8 $\pm$ 29.2<br>(0-87.5)                      | 17.4 $\pm$ 24.5<br>(0-59.5)                       | U-test        | W = 99           | 0.767        |
|                  | distance to next village or<br>city in m (DistVille)                        | 504.1 $\pm$ 407.8<br>(20-1400)                   | 801.0 $\pm$ 673.0<br>(60-1810)                    | t-test        | t = -1.4         | 0.530        |
|                  | distance to next city in m<br>(DistCity)                                    | 7135.0 $\pm$ 4087.6<br>(170-13,130)              | 5859.0 $\pm$ 4488.3<br>(1070-15,110)              | t-test        | t = 0.8          | 0.917        |
| Recreational use | <b>litter related to angling in<br/>No./m shore (A_Lit)</b>                 | <b>0.05 <math>\pm</math> 0.05<br/>(0-0.20)</b>   | <b>0.002 <math>\pm</math> 0.007<br/>(0-0.021)</b> | <b>U-test</b> | <b>W = 140.5</b> | <b>0.007</b> |
|                  | litter unrelated to angling in<br>No./m shore (NonA_Lit)                    | 0.70 $\pm$ 0.50<br>(0.02-1.48)                   | 0.34 $\pm$ 0.71<br>(0-2.29)                       | U-test        | W = 126          | 0.124        |
|                  | <b>angling-sites and open<br/>spaces in % of shoreline<br/>(open_sites)</b> | <b>18.5 <math>\pm</math> 19.8<br/>(3.6-87.7)</b> | <b>8.4 <math>\pm</math> 14.4<br/>(0-48.6)</b>     | <b>U-test</b> | <b>W = 133</b>   | <b>0.044</b> |
|                  | <b>trails and paths per<br/>shoreline in m/m (trails)</b>                   | <b>0.9 <math>\pm</math> 0.1<br/>(0.6-1.1)</b>    | <b>0.4 <math>\pm</math> 0.5<br/>(0-1.4)</b>       | <b>U-test</b> | <b>W = 138</b>   | <b>0.019</b> |
|                  | <b>anglers per lake<br/>(anglers)</b>                                       | <b>1.6 <math>\pm</math> 1.6<br/>(0-5.1)</b>      | <b>0.1 <math>\pm</math> 0.2<br/>(0-0.8)</b>       | <b>U-test</b> | <b>W = 143</b>   | <b>0.006</b> |
|                  | dog walkers per lake<br>(dogs)                                              | 1.7 $\pm$ 1.9<br>(0-6)                           | 0.5 $\pm$ 1.0<br>(0-3.3)                          | U-test        | W = 123.5        | 0.154        |
|                  | <i>swimmers per lake<br/>(swimmers)</i>                                     | <i>2.9 <math>\pm</math> 2.6<br/>(0-10)</i>       | <i>0.7 <math>\pm</math> 1.0<br/>(0-3.1)</i>       | <i>U-test</i> | <i>W = 129.5</i> | <i>0.075</i> |
|                  | <i>other recreationists per lake<br/>(other_people)</i>                     | <i>2.9 <math>\pm</math> 3.2<br/>(0.3-11.9)</i>   | <i>0.9 <math>\pm</math> 1.4<br/>(0-3.8)</i>       | <i>U-test</i> | <i>W = 128.5</i> | <i>0.087</i> |

63

64 Figure 3: Principal component axes (PCA) by category of environmental variables for (a) human  
 65 influence, (b) habitat structure, (c) land use, and (d) recreational intensity. Percentages in brackets  
 66 show the proportional variance explained by each axis. See Table S5 & Table S6 for details on PCA-  
 67 results. Abbreviations used are shown in Table 3 and Table 4. Numbers reflect the different lakes (see  
 68 Table 1). The centroids of management types are plotted as supplementary variables to not influence  
 69 the ordination. The 95% confidence-level around centroids are plotted to visualize differences  
 70 between lake types. Differences are highly significant when confidence-levels do not overlap.

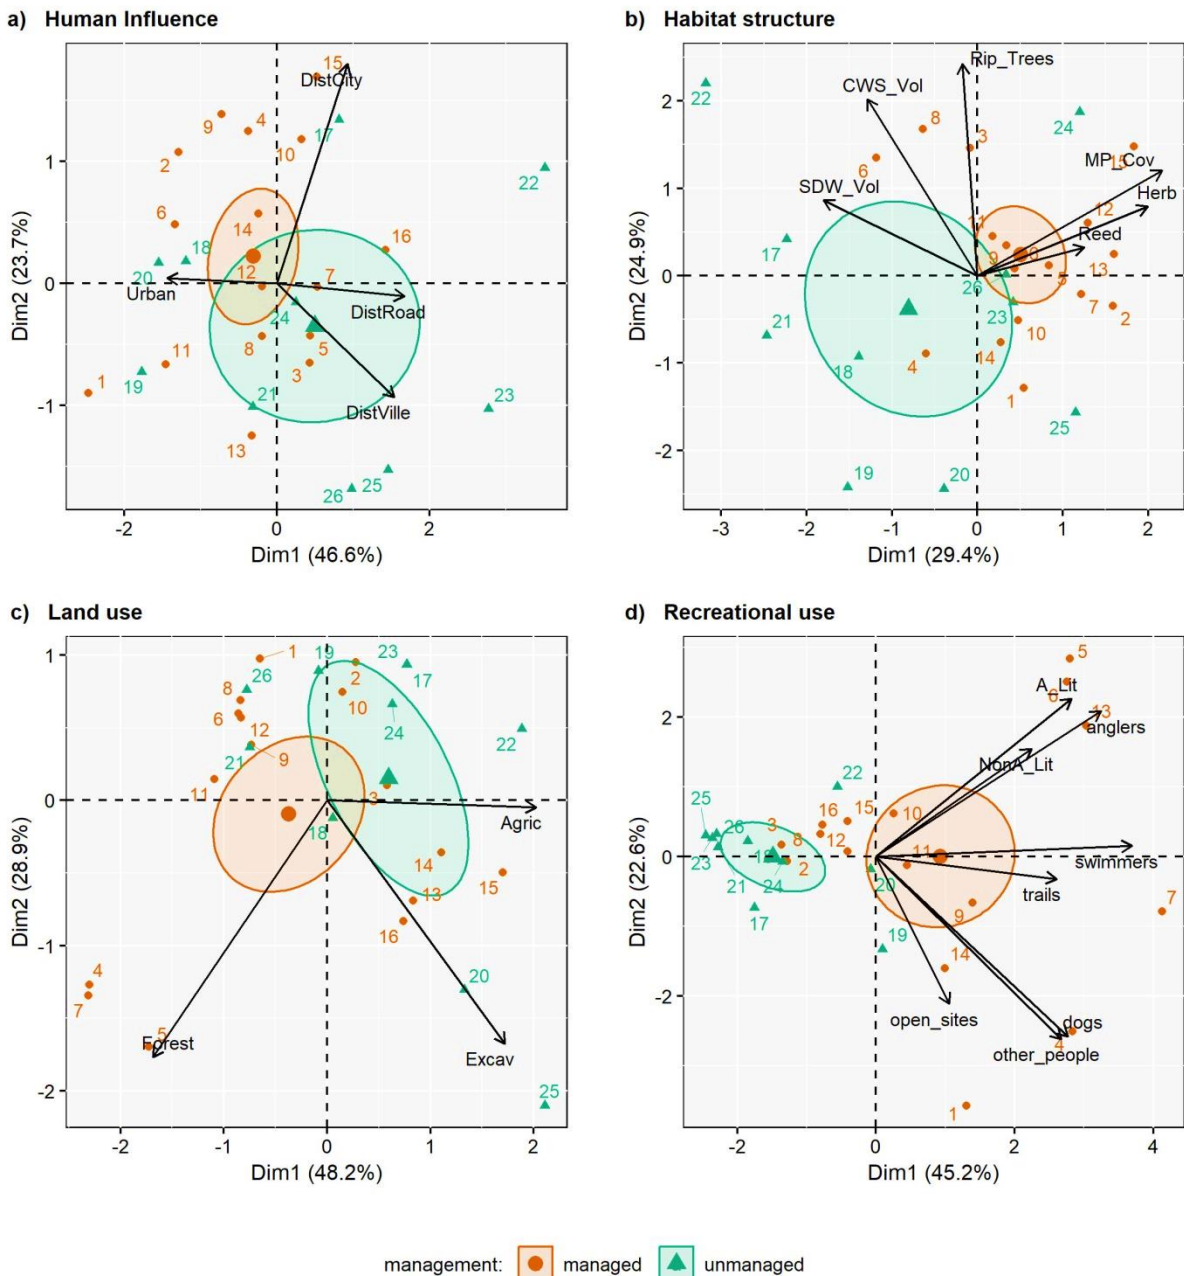

71

72 *Species diversity and taxon-specific conservation value in managed and unmanaged gravel pit lakes*

73 In total 34 species of waterfowl, 3 species of amphibians, 33 species of odonata, 36 species of  
 74 songbirds, 60 species of macrophytes, 44 species of trees and 191 species of herbs were detected  
 75 across the pool of lakes (Table S7). This species inventory represented a substantial fraction of the  
 76 regional species pool in the case of odonata (56%), waterfowl (45%), submerged macrophytes (48%)  
 77 and riparian tree species (59%). By contrast, we detected only around one third or less of the  
 78 regional species pool in the case of songbirds (33%), amphibians (38%) and riparian herb species  
 79 (12%).

80 Variation in local species richness and presence of endangered taxa among individual managed or  
 81 unmanaged lakes was large, yet the frequency of threatened species of a lake's species pool in either  
 82 managed or unmanaged lakes showed rather similar patterns (Figure 4, Figure 5). Most managed and  
 83 unmanaged lakes hosted at least a few threatened species (Figure 4, Figure 5). We found unique  
 84 species in all taxa (except for amphibians) also in single managed and/or unmanaged lakes (Table 5).  
 85 Managed lakes hosted more unique species within most taxa than unmanaged lakes, while  
 86 unmanaged lakes had more unique odonata species. Overwhelmingly, we detected common species,  
 87 particularly among amphibians (Table S7). We found only a few non-native species (Neobiota), which  
 88 are also to some degree invasive species (Kowarik, 2003). All together we found 4 submerged  
 89 macrophyte species, 3 riparian tree species, 2 waterfowl species and 1 dragonfly species listed as  
 90 non-native in Lower Saxony or Germany (see Table S7).

91 The average species richness was statistically similar in managed and unmanaged lakes (Table 6).  
 92 Similarly, the taxon-specific conservation value was, on average, similar among managed and  
 93 unmanaged lakes with one exception: unmanaged lakes hosted amphibian species of a higher  
 94 average conservation value compared to managed lakes, but overall species richness was particularly  
 95 low for this taxon compared to the other taxa (Table 6).

96 Table 5: Overview on unique species of different taxa found at managed and unmanaged gravel pits  
 97 in Lower Saxony, Germany.

| Taxon                 | Species number found only in ... |                    |                        | Sørensen index (similarity) | SER, index (dissimilarity) |
|-----------------------|----------------------------------|--------------------|------------------------|-----------------------------|----------------------------|
|                       | ...managed lakes                 | ...unmanaged lakes | ...one lake (any type) |                             |                            |
| submerged macrophytes | 28                               | 9                  | 31                     | 0.48                        | 0.68                       |
| riparian herbs        | 55                               | 27                 | 57                     | 0.73                        | 0.43                       |
| riparian trees        | 6                                | 4                  | 8                      | 0.86                        | 0.25                       |
| amphibians            | 0                                | 0                  | 0                      | 1.00                        | 0.00                       |
| odonata               | 5                                | 8                  | 7                      | 0.76                        | 0.38                       |
| waterfowl             | 10                               | 5                  | 6                      | 0.69                        | 0.47                       |
| songbirds             | 9                                | 4                  | 12                     | 0.74                        | 0.42                       |



98 When examining the pooled species inventories, no evidence for faunal breaks among managed and  
 99 unmanaged lakes were identified using the Sørensen index (all indices  $\geq 0.5$ ; Table 5) except for  
 100 submerged macrophytes. Similarly, there was no evidence for substantial species turnover ( $SER_r$ ),  
 101 with the exception of submerged macrophytes, where almost 70% of the species pool was different  
 102 between the two management types (Table 5).

103 Figure 4: Local species richness of different plant taxa (panels a & b: submerged macrophyte species,  
 104 c & d: riparian herb species, e & f: riparian tree species), and the frequency of threatened (black) and  
 105 unthreatened (grey) species at managed (panels a, c, e) and unmanaged (panels b, d, f) lakes. Also  
 106 the fraction of regional species pool is indicated.

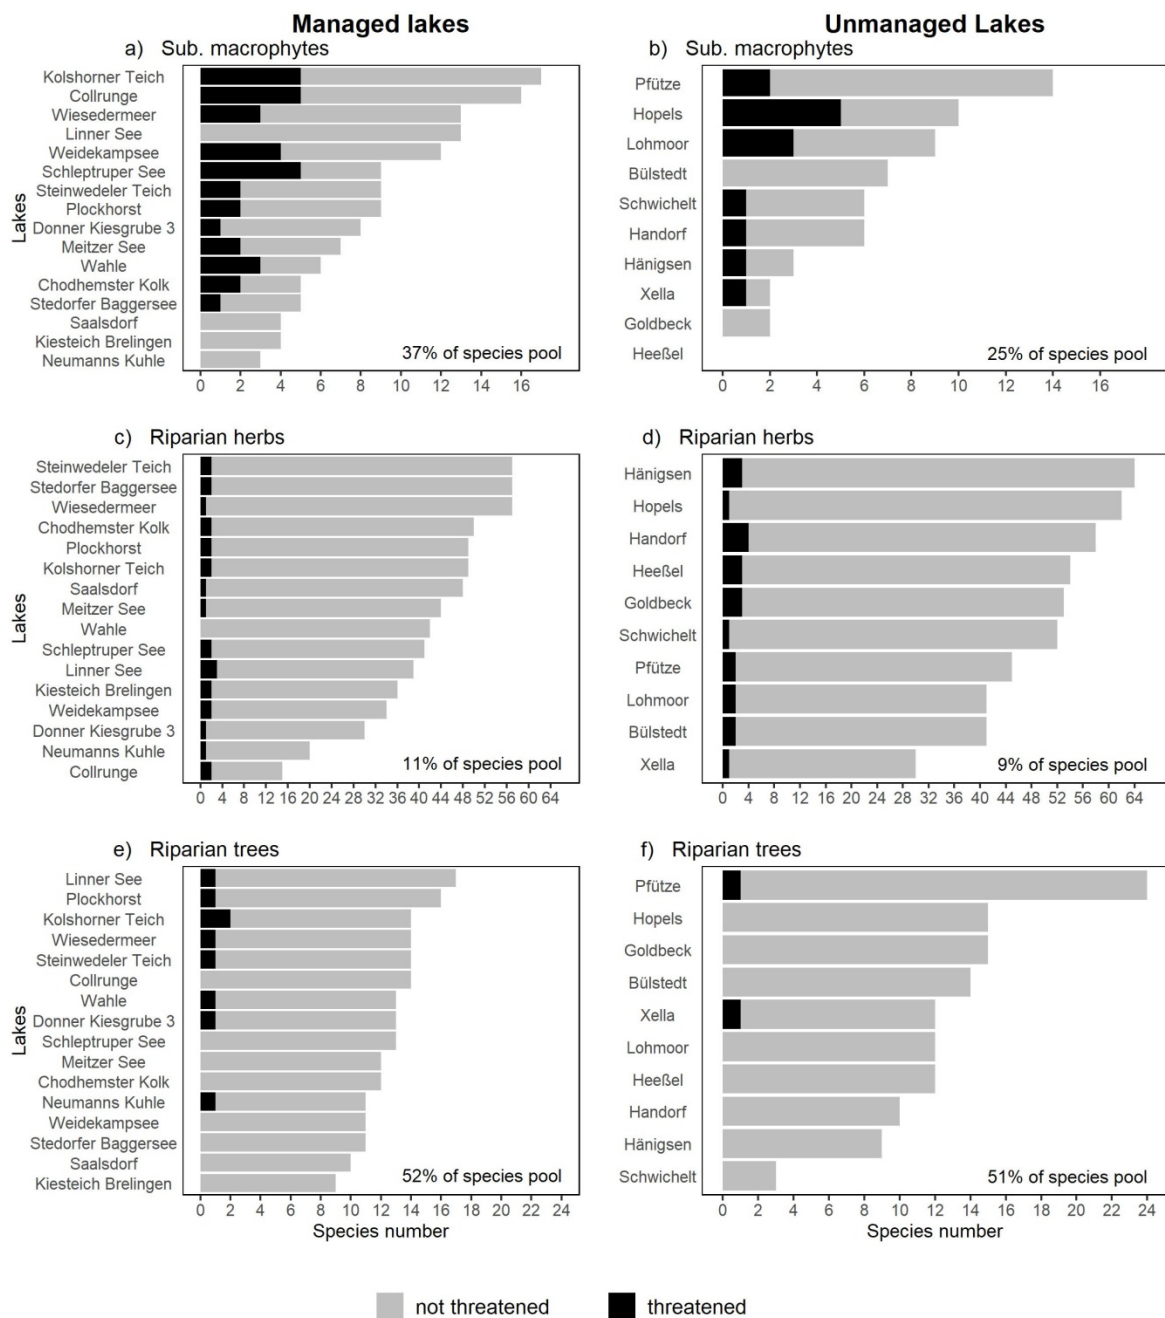

107

108 Figure 5: Local species richness of different taxa (panels a & b: amphibian species, panels c & d:  
 109 odonata species, panels e & f: songbird species, panels g & h: waterfowl species), and the frequency  
 110 of threatened (black) and unthreatened (grey) species at managed (panels a, c, e) and unmanaged  
 111 (panels b, d, f) lakes. Also the fraction of regional species pool is indicated.

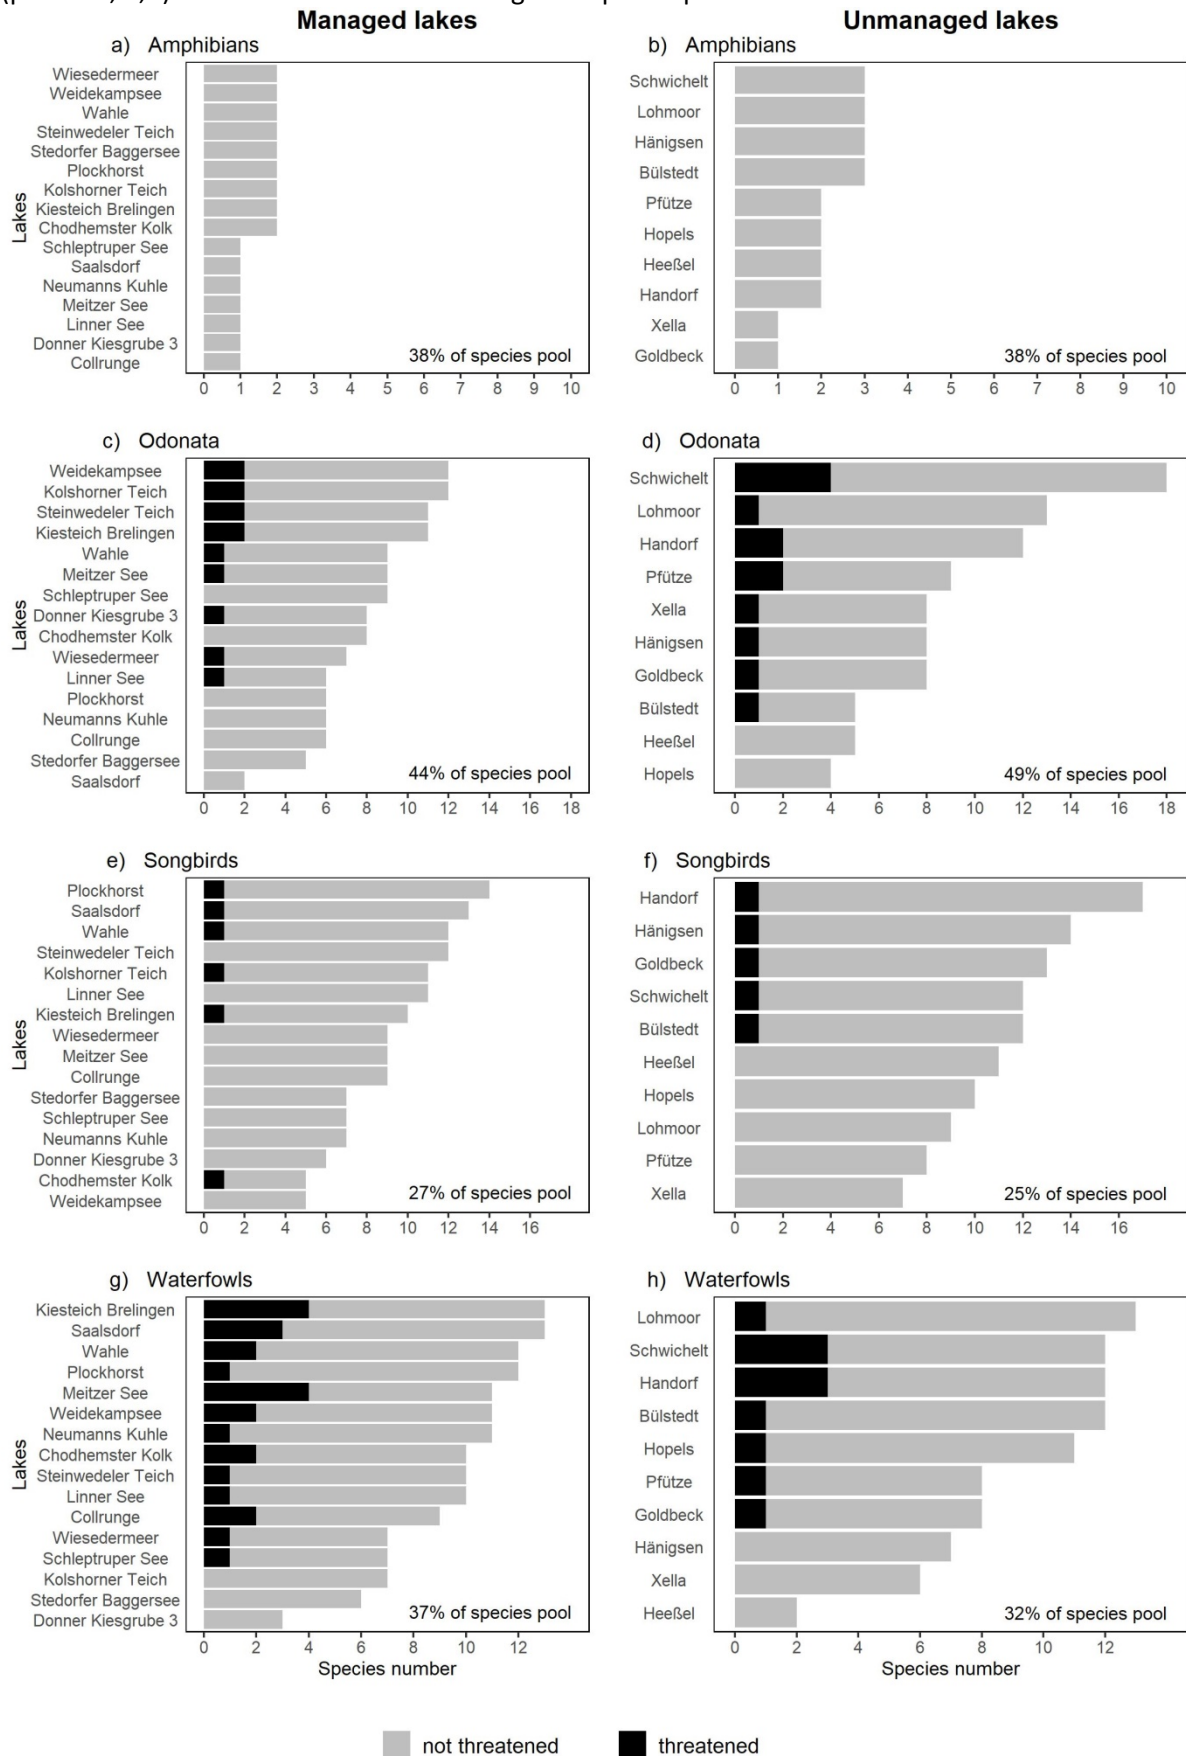

113 Table 6: Comparison of species richness and taxon-specific conservation values in managed and unmanaged gravel pit lakes.

114 **Statistical differences of Sidak-corrected p-values < 0.05 are bolded, statistical trends ( $p < 0.1$ ) are italic.**

115

| Diversity measure  | Taxa                    | mean $\pm$ standard deviation (range)   |                                       | test          | Statistics      |              |
|--------------------|-------------------------|-----------------------------------------|---------------------------------------|---------------|-----------------|--------------|
|                    |                         | managed (N = 16)                        | unmanaged (N = 10)                    |               | statistic       | p-value      |
| species richness   | submerged macrophytes   | 8.8 $\pm$ 4.4 (3-17)                    | 5.9 $\pm$ 4.3 (0-14)                  | t-test        | t = 1.63        | 0.710        |
|                    | riparian herbs          | 41.8 $\pm$ 12.5 (15-57)                 | 50 $\pm$ 10.7 (30-64)                 | t-test        | t = -1.73       | 0.638        |
|                    | riparian trees          | 12.8 $\pm$ 2.1 (9-17)                   | 12.6 $\pm$ 5.3 (3-24)                 | Welch-test    | t = 0.08        | 1.000        |
|                    | amphibians              | 1.6 $\pm$ 0.5 (1-2)                     | 2.2 $\pm$ 0.8 (1-3)                   | U-test        | W = 43          | 0.299        |
|                    | amphibians reproducing  | 1 $\pm$ 0.6 (0-2)                       | 1.4 $\pm$ 0.8 (0-3)                   | U-test        | W = 59          | 0.922        |
|                    | odonata                 | 7.9 $\pm$ 2.8 (2-12)                    | 9 $\pm$ 4.3 (4-18)                    | t-test        | t = -0.77       | 0.997        |
|                    | damselflies             | 4.3 $\pm$ 1.3 (2-6)                     | 4.4 $\pm$ 1.3 (3-7)                   | t-test        | t = -0.29       | 1.000        |
|                    | dragonflies             | 3.7 $\pm$ 2.1 (0-7)                     | 4.6 $\pm$ 3.4 (1-12)                  | t-test        | t = -0.84       | 0.995        |
|                    | songbirds               | 9.2 $\pm$ 2.8 (5-14)                    | 11.3 $\pm$ 3 (7-17)                   | t-test        | t = -1.81       | 0.577        |
| waterfowl          | 9.5 $\pm$ 2.8 (3-13)    | 9.1 $\pm$ 3.5 (2-13)                    | t-test                                | t = 0.32      | 1.000           |              |
| threatened species | submerged macrophytes   | 2.2 $\pm$ 1.8 (0-5)                     | 1.4 $\pm$ 1.6 (0-5)                   | U-test        | W = 100.5       | 0.949        |
|                    | riparian herbs          | 1.6 $\pm$ 0.7 (0-3)                     | 2.2 $\pm$ 1 (1-4)                     | U-test        | W = 55.5        | 0.823        |
|                    | riparian trees          | 0.6 $\pm$ 0.6 (0-2)                     | 0.2 $\pm$ 0.4 (0-1)                   | U-test        | W = 105         | 0.714        |
|                    | amphibians reproducing  | 0.2 $\pm$ 0.4 (0-2)                     | 0.5 $\pm$ 0.7 (0-2)                   | U-test        | W = 61.5        | 0.893        |
|                    | odonata                 | 0.8 $\pm$ 0.8 (0-2)                     | 1.3 $\pm$ 1.2 (0-4)                   | U-test        | W = 61.5        | 0.967        |
|                    | damselflies             | 0.3 $\pm$ 0.5 (0-1)                     | 0.1 $\pm$ 0.3 (0-1)                   | U-test        | W = 92          | 0.985        |
|                    | dragonflies             | 0.6 $\pm$ 0.7 (0-2)                     | 1.2 $\pm$ 1.2 (0-4)                   | U-test        | W = 54.5        | 0.780        |
|                    | songbirds               | 0.4 $\pm$ 0.5 (0-1)                     | 0.5 $\pm$ 0.5 (0-1)                   | U-test        | W = 70          | 0.999        |
| waterfowl          | 1.6 $\pm$ 1.3 (0-4)     | 1.1 $\pm$ 1.1 (0-3)                     | U-test                                | W = 98.5      | 0.969           |              |
| conservation value | submerged macrophytes   | 5.6 $\pm$ 2.2 (1.2-10.9)                | 3.5 $\pm$ 1.9 (1-6.2)                 | t-test        | t = 2.38        | 0.232        |
|                    | riparian vegetation     | 1.6 $\pm$ 0.4 (0.7-2.6)                 | 1.4 $\pm$ 0.2 (1-1.7)                 | t-test        | t = 1.72        | 0.643        |
|                    | riparian herbs          | 1.7 $\pm$ 0.7 (0.3-3.4)                 | 1.4 $\pm$ 0.3 (0.8-1.8)               | Welch-test    | t = 1.48        | 0.812        |
|                    | riparian trees          | 1.7 $\pm$ 0.3 (1-2.3)                   | 1.3 $\pm$ 0.4 (1-1.9)                 | U-test        | W = 122         | 0.245        |
|                    | <b>amphibians</b>       | <b>1.3 <math>\pm</math> 0.3 (1-1.5)</b> | <b>1.6 <math>\pm</math> 0.3 (1-2)</b> | <b>U-test</b> | <b>W = 30.5</b> | <b>0.048</b> |
|                    | odonata                 | 1.8 $\pm$ 0.8 (1-3.7)                   | 1.7 $\pm$ 1 (1-3.9)                   | U-test        | W = 91.5        | 1.000        |
|                    | damselflies             | 1.4 $\pm$ 0.6 (1-2.8)                   | 1.2 $\pm$ 0.2 (1-1.7)                 | U-test        | W = 87          | 1.000        |
|                    | dragonflies             | 2.1 $\pm$ 1.6 (1-6)                     | 2.3 $\pm$ 1.9 (1-6.5)                 | U-test        | W = 75          | 1.000        |
|                    | songbirds               | 1.6 $\pm$ 0.5 (1-2.7)                   | 1.6 $\pm$ 0.2 (1.2-1.9)               | Welch-test    | t = 0.06        | 1.000        |
| waterfowl          | 3.1 $\pm$ 1.7 (1.1-6.6) | 2.7 $\pm$ 1.1 (1.2-3.9)                 | t-test                                | t = 0.68      | 0.999           |              |

116 Species aggregation curves indicated that the regional species pool (i.e., gamma diversity) was not  
117 saturating in our sampling, with the exception of amphibians and to a lesser degree odonata.  
118 However, there were statistical differences in the species assemblages of managed and unmanaged  
119 lakes only in submerged macrophytes (managed lakes have a bigger regional species pool = higher  
120 gamma-diversity) and in riparian herbs (unmanaged lakes reach their regional species pool earlier =  
121 higher beta-diversity, Table 7). With the fact, that the combined curve of all sampled lakes reaches  
122 the same (amphibians) or even higher (all other taxa) regional species richness than a lake type  
123 alone, these findings indicates that the regional species pool benefits from the unique contributions  
124 of species hosted by different lakes, independent of whether they are managed or not (Figure  
125 6, Figure 7).

126 Figure 6: Species accumulation curves for submerged macrophytes, riparian herbs, riparian trees, and  
127 odonata.

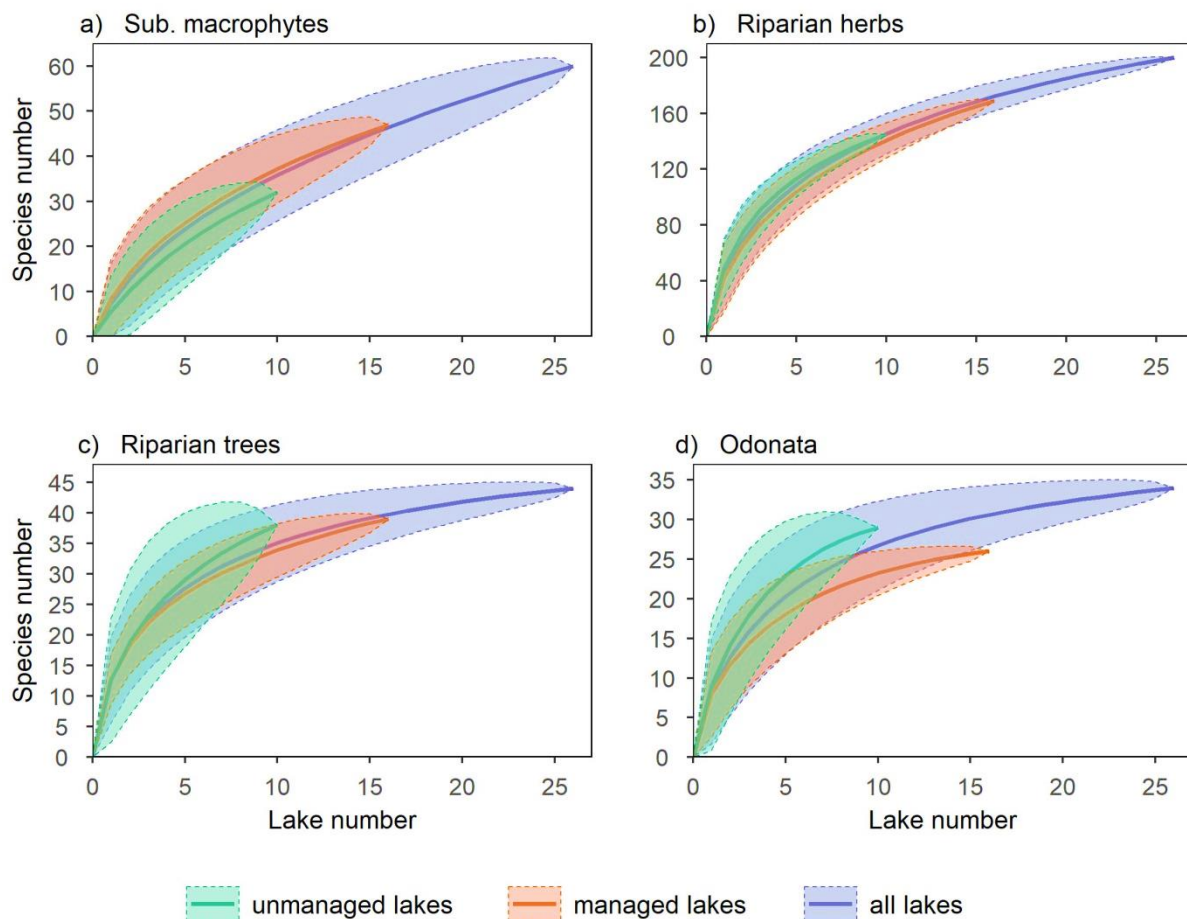

128

129 Table 7: Comparison of species assemblages of different taxa in managed and unmanaged gravel pit  
 130 lakes assessed by comparing the species aggregation curves (Figure 6, Figure 7) with  $\chi^2$ -tests.  
 131 **Statistical differences of Sidak-corrected p-values < 0.05 are bolded**, statistical trends ( $p < 0.1$ ) are  
 132 *italic*.

| Species assemblages          | T-statistic   | p-value           |
|------------------------------|---------------|-------------------|
| <b>submerged macrophytes</b> | <b>121.76</b> | <b>&lt; 0.001</b> |
| <b>riparian herbs</b>        | <b>50.51</b>  | <b>&lt; 0.001</b> |
| riparian trees               | 10.63         | 0.980             |
| amphibians (adults)          | 6.61          | 1.000             |
| amphibians (reproduction)    | 12.72         | 0.889             |
| odonata                      | 15.16         | 0.660             |
| songbirds                    | 8.95          | 0.998             |
| waterfowl                    | 6.16          | 1.000             |

133

134 Figure 7: Species accumulation curves for amphibians, songbirds, and waterfowl.

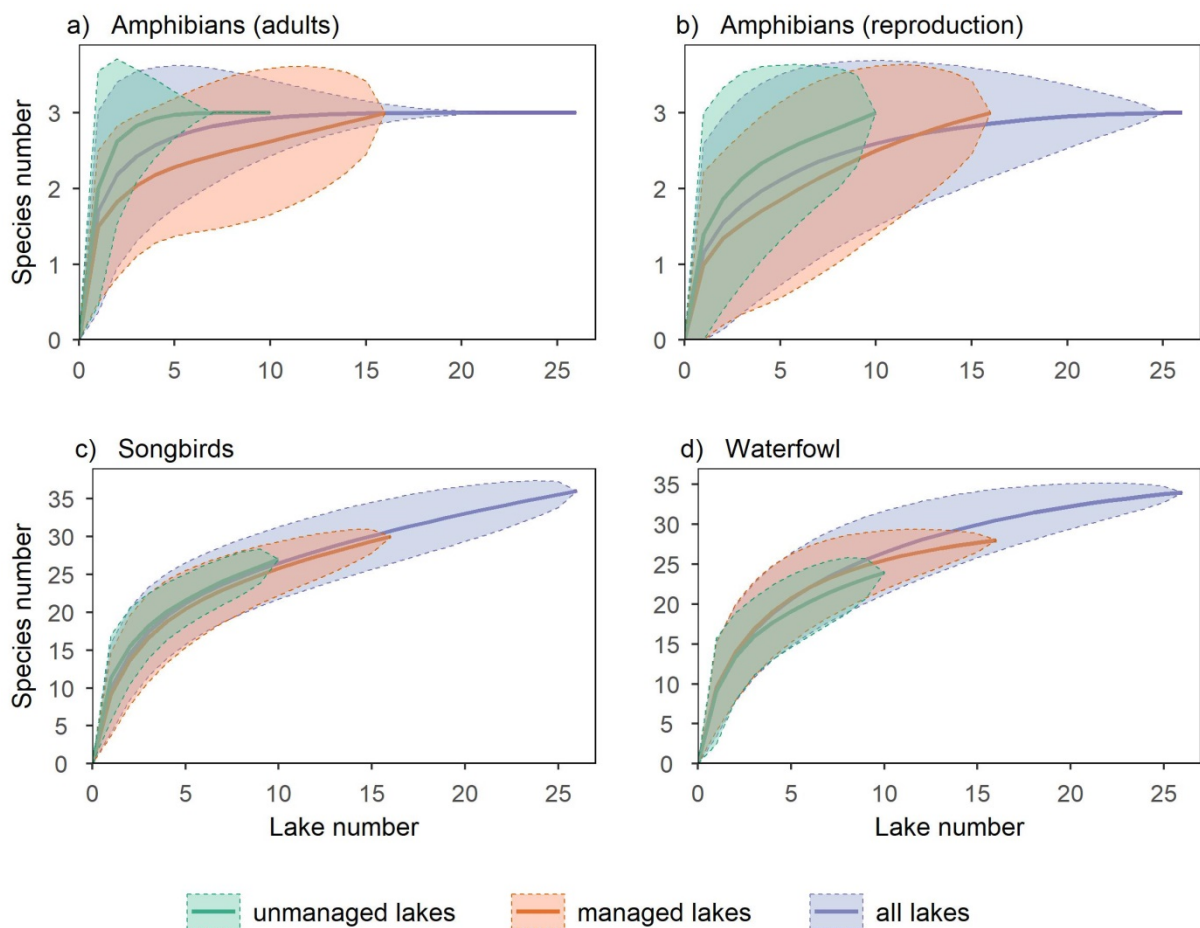

135

136 *Environmental correlates of species richness and conservation value in managed and unmanaged*  
137 *gravel pit lakes*

138 There was no joint variation in species richness and conservation value across lakes indicating taxon-  
139 specific responses to lake conditions (Figure 8, Figure 9). In relation to species richness across taxa,  
140 the first PCA axis represented covariance of amphibian, songbirds and riparian herb species diversity,  
141 collectively representing riparian diversity (Table S9). It was along this axis, where managed and  
142 unmanaged lakes varied close to significantly, with unmanaged lakes showing a non-significant trend  
143 (RDA,  $R^2_{adj.} = 0.043$ ,  $F = 2.12$ ,  $p = 0.051$ ) for hosting larger riparian diversity (Figure 8a). The second  
144 PCA axis represented high species richness of aquatic diversity in relation to submerged macrophytes  
145 and odonata, and no differentiation among managed and unmanaged lakes was revealed (Figure 8a).  
146 The third PC axis was related to the diversity of riparian tree species and the fourth mainly to  
147 waterfowl diversity, and again no relevant separation among lake types was revealed (Table S9).

148 High conservation value of macrophytes and waterfowl correlated with lakes offering a low  
149 conservation value for amphibians (first PC axis, Table S10). Along this first PC axis managed and  
150 unmanaged lakes differentiated the most: managed lakes revealed a significantly higher conservation  
151 value of waterfowl, odonata and macrophytes and a lower conservation value of amphibians (Figure  
152 9a,  $R^2_{adj.} = 0.068$ ,  $F = 2.83$ ,  $p = 0.008$ ). The second PC axis was mainly represented by a high  
153 conservation value of songbirds and to a lesser degree waterfowl, and the third axis represented the  
154 conservation value of riparian plants, but lakes did not differentiate along the second and third axes  
155 (Table S10, Figure 9).

156 All environmental indicators subsumed by PC-scores had acceptable inflation factors and were thus  
157 used for RDA analysis of species richness and conservation value (Table S8). The forward RDA-based  
158 model selection retained several significant environmental predictor variables of species richness  
159 (Table 8). Woody habitat was negatively correlated with the riparian species richness and positively  
160 with tree diversity, vegetated habitat was positively correlated with species richness of submerged  
161 macrophytes and odonata, and the lake-steepness index (which correlated with smaller lake sizes  
162 and low shoreline development indices) was negatively correlated with waterfowl species richness  
163 (Figure 8, Table S9). The rural index most strongly correlated with submerged macrophytes and  
164 odonata (Table S9). The recreational use intensity did not correlate with species diversity (Table 8).  
165 After accounting for these environmental variables, management was no longer significant in  
166 explaining species diversity across taxa and dropped out from the RDA (Table 9).

167 In terms of taxa-specific conservation value, the RDA analysis indicated that the general recreational  
168 use intensity of a lake positively correlated with the first PC axis; lakes with greater recreational use  
169 intensity also hosted a larger conservation value of aquatic taxa (i.e., submerged macrophytes,

170 odonata and waterfowl) and lower conservation value of amphibians (Figure 9, Table S10). The  
171 woody habitat negatively correlated with the conservation value of songbirds, which mainly  
172 represented the second axis. Managed and unmanaged lakes differed strongly in the recreational use  
173 intensity, but in contrast to our hypothesis this environmental factor was positively, rather than  
174 negatively, associated with the conservation value of all taxa except amphibians (Figure 9, Table S10).  
175 When entering management as an additional explanatory factor in the RDA, it was retained as the  
176 only variable, most likely because of its correlation with the recreational use intensity (Table 9).

177 Table 8: ANOVA of forward model selection results for species richness and conservation value  
 178 (management not used as predictor variable). Variables are ordered by their  $R^2_{adj}$ -value. **Significant**  
 179 **variables ( $p < 0.05$ ) are bolded, statistical trends ( $p < 0.1$ ) are italic.**

| Modelling step                                               | Variable                                  | Variance explained | $R^2_{adj}$  | F-statistic | p-value           |
|--------------------------------------------------------------|-------------------------------------------|--------------------|--------------|-------------|-------------------|
| full model<br>(without management)<br>for species richness   | <b>woody_habitat</b>                      | <b>0.96</b>        | <b>0.130</b> | <b>5.03</b> | <b>&lt; 0.001</b> |
|                                                              | <b>Age</b>                                | <b>0.51</b>        | <b>0.039</b> | <b>2.67</b> | <b>0.022</b>      |
|                                                              | <b>lake_steepness</b>                     | <b>0.46</b>        | <b>0.038</b> | <b>2.39</b> | <b>0.038</b>      |
|                                                              | acidity                                   | 0.16               | 0.032        | 0.83        | 0.557             |
|                                                              | <b>vegetated_habitat</b>                  | <b>0.48</b>        | <b>0.030</b> | <b>2.52</b> | <b>0.027</b>      |
|                                                              | nitrogen                                  | 0.21               | 0.018        | 1.08        | 0.378             |
|                                                              | <i>lake_shallowness</i>                   | <i>0.39</i>        | <i>0.017</i> | <i>2.06</i> | <i>0.067</i>      |
|                                                              | conductivity                              | 0.31               | 0.017        | 1.61        | 0.157             |
|                                                              | agriculture                               | 0.33               | 0.009        | 1.72        | 0.123             |
|                                                              | non_accessibility                         | 0.34               | 0.006        | 1.78        | 0.116             |
|                                                              | trophic state                             | 0.19               | 0.005        | 1.01        | 0.410             |
|                                                              | general_recreational_use_intensity        | 0.32               | -0.011       | 1.66        | 0.141             |
|                                                              | wetland                                   | 0.04               | -0.011       | 0.20        | 0.980             |
|                                                              | distance_to_next_river                    | 0.17               | -0.016       | 0.87        | 0.523             |
| rural                                                        | 0.25                                      | -0.017             | 1.29         | 0.276       |                   |
| best model<br>for species richness                           | <b>woody_habitat</b>                      | <b>1.16</b>        | <b>0.275</b> | <b>5.69</b> | <b>&lt; 0.001</b> |
|                                                              | <b>lake_steepness</b>                     | <b>0.58</b>        |              | <b>2.85</b> | <b>0.012</b>      |
|                                                              | <b>vegetated_habitat</b>                  | <b>0.50</b>        |              | <b>2.47</b> | <b>0.026</b>      |
|                                                              | <b>rural</b>                              | <b>0.50</b>        |              | <b>2.46</b> | <b>0.028</b>      |
| full model<br>(without management)<br>for conservation value | <i>woody_habitat</i>                      | <i>0.60</i>        | <i>0.040</i> | <i>2.01</i> | <i>0.083</i>      |
|                                                              | general_recreational_use_intensity        | 0.16               | 0.039        | 0.55        | 0.780             |
|                                                              | lake_shallowness                          | 0.45               | 0.026        | 1.51        | 0.194             |
|                                                              | non_accessibility                         | 0.29               | 0.022        | 0.96        | 0.456             |
|                                                              | nitrogen                                  | 0.20               | 0.015        | 0.67        | 0.660             |
|                                                              | distance_to_next_river                    | 0.43               | 0.013        | 1.46        | 0.211             |
|                                                              | Age                                       | 0.22               | 0.007        | 0.73        | 0.643             |
|                                                              | agriculture                               | 0.27               | 0.003        | 0.91        | 0.499             |
|                                                              | acidity                                   | 0.32               | 0.003        | 1.09        | 0.386             |
|                                                              | rural                                     | 0.38               | -0.010       | 1.28        | 0.278             |
|                                                              | vegetated_habitat                         | 0.21               | -0.012       | 0.70        | 0.664             |
|                                                              | conductivity                              | 0.26               | -0.013       | 0.86        | 0.528             |
|                                                              | trophic_state                             | 0.09               | -0.017       | 0.30        | 0.939             |
|                                                              | wetland                                   | 0.07               | -0.026       | 0.23        | 0.971             |
| lake_steepness                                               | 0.03                                      | -0.037             | 0.11         | 0.997       |                   |
| best model<br>for conservation value                         | <b>woody_habitat</b>                      | <b>0.55</b>        | <b>0.083</b> | <b>2.14</b> | <b>0.046</b>      |
|                                                              | <i>general_recreational_use_intensity</i> | <i>0.54</i>        |              | <i>2.12</i> | <i>0.051</i>      |

180



181 Table 9: ANOVA of forward model selection results for species richness and conservation value  
 182 (management included as predictor variable). Variables are ordered by their  $R^2_{adj}$ -value. **Significant**  
 183 **variables ( $p < 0.05$ ) are bolded, statistical trends ( $p < 0.1$ ) are italic.**

| Modelling step                                                        | Variable                                  | Variance explained | $R^2_{adj}$   | F-statistic  | p-value           |
|-----------------------------------------------------------------------|-------------------------------------------|--------------------|---------------|--------------|-------------------|
| full model<br>(without<br>management)<br>for species<br>richness      | <b>woody_habitat</b>                      | <b>0.85</b>        | <b>0.130</b>  | <b>4.72</b>  | <b>0.001</b>      |
|                                                                       | <b>management</b>                         | <b>0.57</b>        | <b>0.043</b>  | <b>3.14</b>  | <b>0.008</b>      |
|                                                                       | <i>Age</i>                                | <i>0.40</i>        | <i>0.039</i>  | <i>2.23</i>  | <i>0.053</i>      |
|                                                                       | <b>lake_steepness</b>                     | <b>0.42</b>        | <b>0.038</b>  | <b>2.34</b>  | <b>0.041</b>      |
|                                                                       | <i>acidity</i>                            | <i>0.16</i>        | <i>0.032</i>  | <i>0.89</i>  | <i>0.510</i>      |
|                                                                       | <i>vegetated_habitat</i>                  | <i>0.39</i>        | <i>0.030</i>  | <i>2.16</i>  | <i>0.058</i>      |
|                                                                       | <i>nitrogen</i>                           | <i>0.28</i>        | <i>0.018</i>  | <i>1.53</i>  | <i>0.184</i>      |
|                                                                       | <i>lake_shallowness</i>                   | <i>0.37</i>        | <i>0.017</i>  | <i>2.05</i>  | <i>0.071</i>      |
|                                                                       | <i>conductivity</i>                       | <i>0.34</i>        | <i>0.017</i>  | <i>1.89</i>  | <i>0.097</i>      |
|                                                                       | <i>agriculture</i>                        | <i>0.26</i>        | <i>0.009</i>  | <i>1.43</i>  | <i>0.222</i>      |
|                                                                       | <i>non_accessibility</i>                  | <i>0.35</i>        | <i>0.006</i>  | <i>1.94</i>  | <i>0.086</i>      |
|                                                                       | <i>trophic state</i>                      | <i>0.20</i>        | <i>0.005</i>  | <i>1.09</i>  | <i>0.376</i>      |
|                                                                       | <b>general_recreational_use_intensity</b> | <b>0.41</b>        | <b>-0.011</b> | <b>2.27</b>  | <b>0.049</b>      |
|                                                                       | <i>wetland</i>                            | <i>0.05</i>        | <i>-0.011</i> | <i>0.28</i>  | <i>0.951</i>      |
| <i>distance_to_next_river</i>                                         | <i>0.07</i>                               | <i>-0.016</i>      | <i>0.41</i>   | <i>0.877</i> |                   |
| <i>rural</i>                                                          | <i>0.24</i>                               | <i>-0.017</i>      | <i>1.35</i>   | <i>0.247</i> |                   |
| best model<br>for species<br>richness                                 | <b>woody_habitat</b>                      | <b>1.16</b>        | <b>0.275</b>  | <b>5.69</b>  | <b>&lt; 0.001</b> |
|                                                                       | <b>lake_steepness</b>                     | <b>0.58</b>        |               | <b>2.85</b>  | <b>0.013</b>      |
|                                                                       | <b>vegetated_habitat</b>                  | <b>0.50</b>        |               | <b>2.47</b>  | <b>0.024</b>      |
|                                                                       | <b>rural</b>                              | <b>0.50</b>        |               | <b>2.46</b>  | <b>0.027</b>      |
| full model<br>(without<br>management)<br>for<br>conservation<br>value | <b>management</b>                         | <b>0.73</b>        | <b>0.068</b>  | <b>2.57</b>  | <b>0.022</b>      |
|                                                                       | <i>woody_habitat</i>                      | <i>0.37</i>        | <i>0.040</i>  | <i>1.29</i>  | <i>0.281</i>      |
|                                                                       | <i>general_recreational_use_intensity</i> | <i>0.47</i>        | <i>0.039</i>  | <i>1.64</i>  | <i>0.152</i>      |
|                                                                       | <i>lake_shallowness</i>                   | <i>0.43</i>        | <i>0.026</i>  | <i>1.50</i>  | <i>0.194</i>      |
|                                                                       | <i>non_accessibility</i>                  | <i>0.28</i>        | <i>0.022</i>  | <i>0.98</i>  | <i>0.443</i>      |
|                                                                       | <i>nitrogen</i>                           | <i>0.14</i>        | <i>0.015</i>  | <i>0.48</i>  | <i>0.824</i>      |
|                                                                       | <i>distance_to_next_river</i>             | <i>0.36</i>        | <i>0.013</i>  | <i>1.25</i>  | <i>0.291</i>      |
|                                                                       | <i>Age</i>                                | <i>0.19</i>        | <i>0.007</i>  | <i>0.68</i>  | <i>0.667</i>      |
|                                                                       | <i>agriculture</i>                        | <i>0.23</i>        | <i>0.003</i>  | <i>0.81</i>  | <i>0.571</i>      |
|                                                                       | <i>acidity</i>                            | <i>0.30</i>        | <i>0.003</i>  | <i>1.06</i>  | <i>0.404</i>      |
|                                                                       | <i>rural</i>                              | <i>0.34</i>        | <i>-0.010</i> | <i>1.19</i>  | <i>0.325</i>      |
|                                                                       | <i>vegetated_habitat</i>                  | <i>0.11</i>        | <i>-0.012</i> | <i>0.40</i>  | <i>0.885</i>      |
|                                                                       | <i>conductivity</i>                       | <i>0.28</i>        | <i>-0.013</i> | <i>0.98</i>  | <i>0.455</i>      |
|                                                                       | <i>trophic_state</i>                      | <i>0.09</i>        | <i>-0.017</i> | <i>0.31</i>  | <i>0.933</i>      |
| <i>wetland</i>                                                        | <i>0.05</i>                               | <i>-0.026</i>      | <i>0.16</i>   | <i>0.991</i> |                   |
| <i>lake_steepness</i>                                                 | <i>0.03</i>                               | <i>-0.037</i>      | <i>0.09</i>   | <i>0.998</i> |                   |
| best model<br>for<br>conservation<br>value                            | <b>management</b>                         | <b>0.73</b>        | <b>0.068</b>  | <b>2.83</b>  | <b>0.010</b>      |

184

185 Figure 8: Principal component analysis (PCA) of species richness plotted for the first 4 axes (a: Dim 1  
 186 & 2, b: Dim 1 & 3, c: Dim 2 & 3, d: Dim 1 & 4, e: Dim 2 & 4, f: Dim 3 & 4). Percentages in brackets  
 187 show the proportional variance explained by each axis. Names of selected explanatory variables are  
 188 shown in Table S5Table S6. Numbers reflect the different lakes, see Table 1. The centroids of  
 189 management types and the explanatory variables from redundancy analysis (RDA, slashed purple  
 190 lines) are plotted as supplementary variables to not influence the ordination. The 95% confidence-  
 191 level around centroids are plotted to visualize differences between lake types.

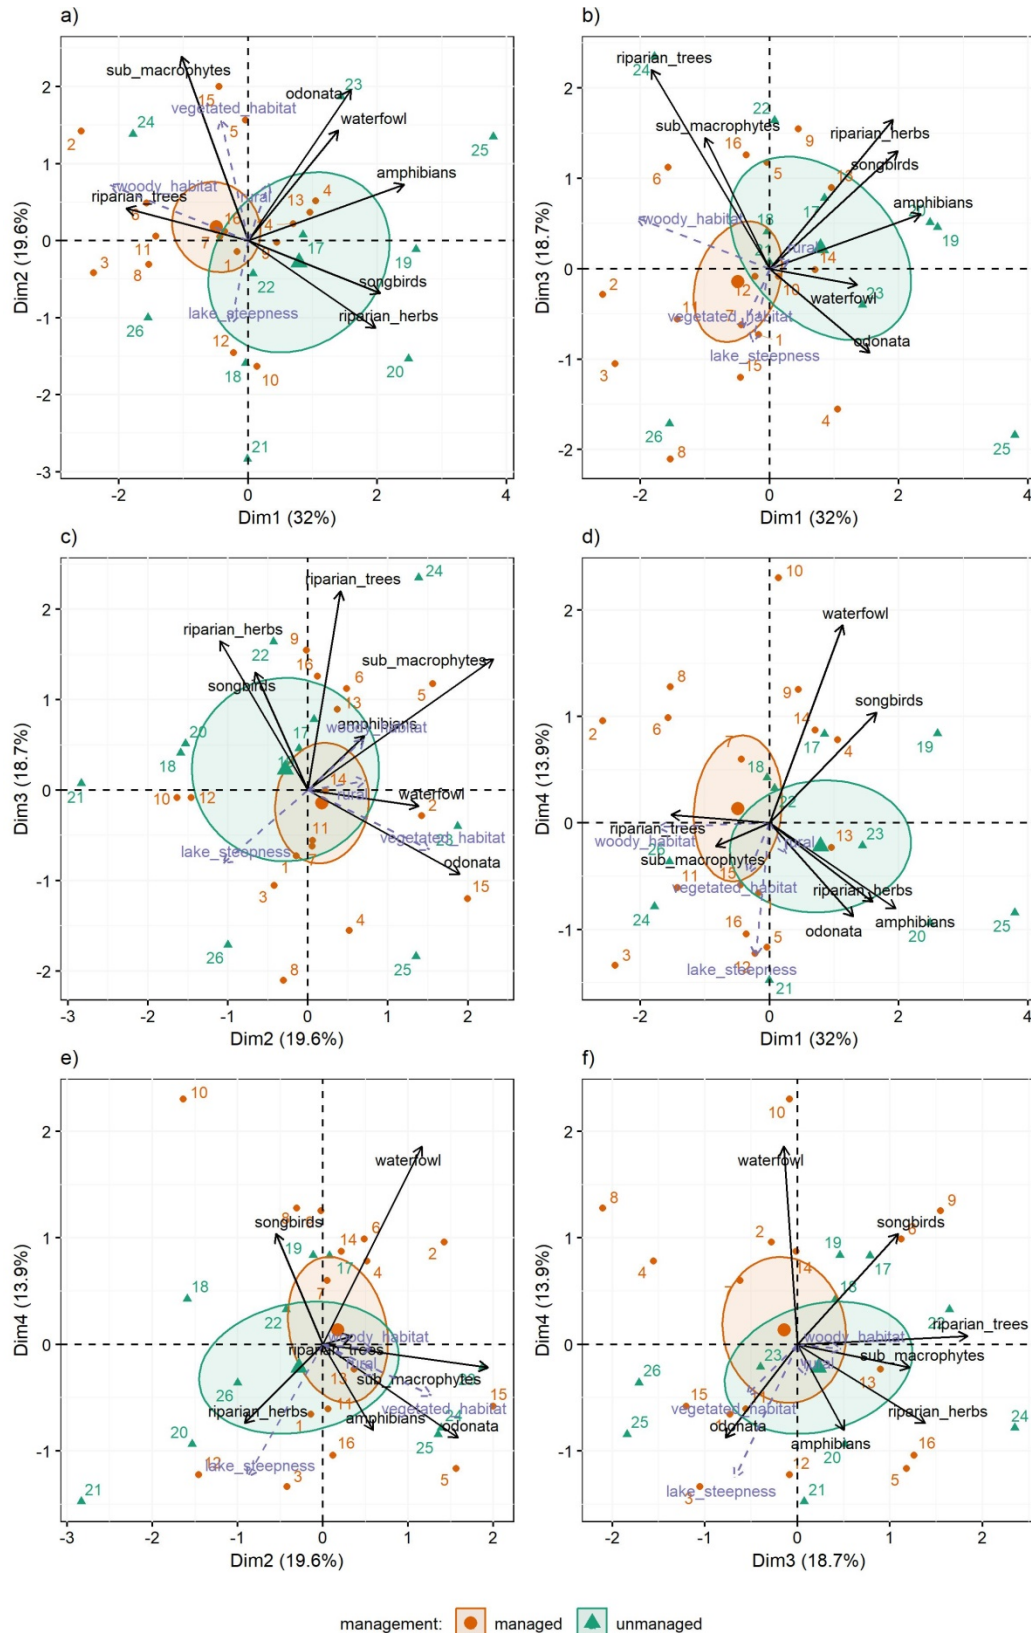

193 Figure 9: Principal component analysis (PCA) of conservation value plotted for the first 3 axes (a: Dim  
 194 1 & 2, b: Dim 1 & 3, c: Dim 2 & 3). Percentages in brackets show the proportional variance explained  
 195 by each axis. Names of selected explanatory variables are shown in Table S5Table S6. Numbers  
 196 reflect the different lakes, see Table 1. The centroids of management types and the explanatory  
 197 variables from redundancy analysis (RDA, slashed purple lines) are plotted as supplementary  
 198 variables to not influence the ordination. The 95% confidence-level around centroids are plotted to  
 199 visualize differences between lake types.

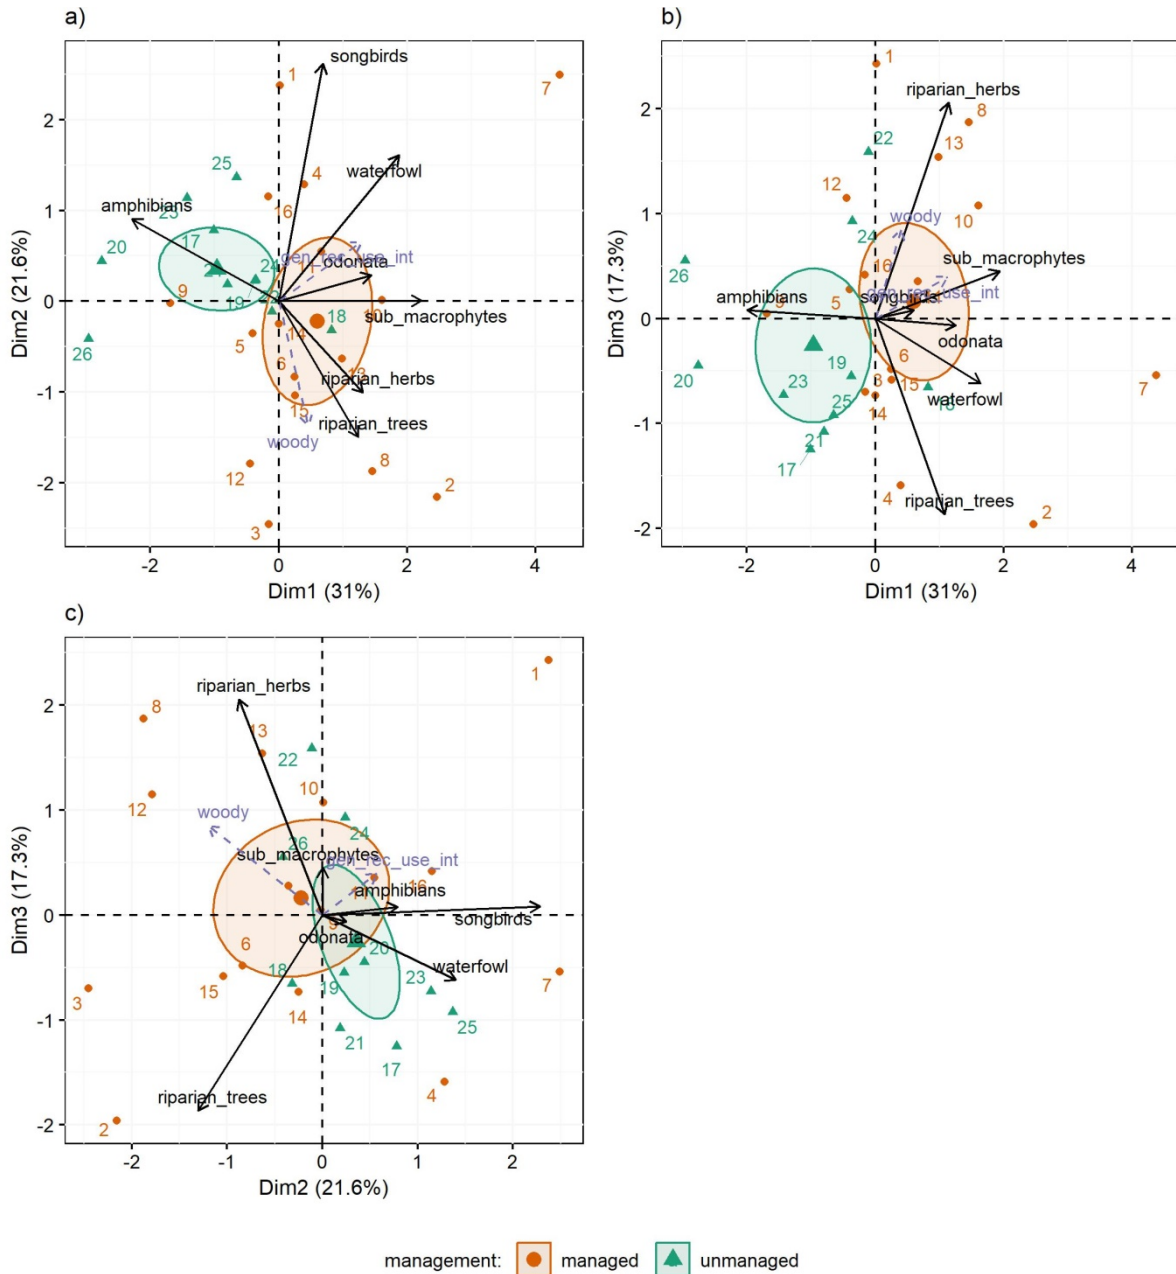

200

## 4. Discussion

1 Our comparative study revealed that gravel pit lakes managed and used by anglers constitute a  
2 highly suitable environment for hosting a large diversity and a large fraction of regional species pool  
3 of aquatic and riparian species associated with lakes. This finding joins related work that has revealed  
4 that gravel pits are suitable habitats for multiple vertebrate and invertebrate taxa, some of which  
5 have very high conservation value (Damnjanović et al., 2018; Emmrich et al., 2014; Matern et al., in  
6 press; Søndergaard et al., 2018; Völkl, 2010). We were unable to reject our null hypothesis of no  
7 differences in aquatic and riparian biodiversity in and at angler-managed lakes compared to  
8 unmanaged ones. Therefore, we conclude that with few exceptions (in particular amphibians, this  
9 study, and fish, Emmrich et al., 2014; Matern et al., in press) managed and unmanaged lakes host a  
10 species inventory of largely similar richness and conservation value and that the regional species  
11 diversity benefits from the presence of unique species in different lakes. In fact the number of unique  
12 species across most taxa was particularly high in managed lakes. Our study provides evidence that  
13 recreational-fisheries management and the use of gravel pits by recreational anglers does not per se  
14 constitute a constraint for the establishment of a large species pool of aquatic biodiversity and in fact  
15 may foster or be positively associated with local biodiversity.

16 Our studied lakes were similar in the majority of the environmental factors that we examined except  
17 the recreational use intensity and the extension of vegetation, particularly submerged macrophytes,  
18 which, surprisingly perhaps, were more prevalent in managed gravel pit lakes compared to  
19 unmanaged systems. This supports our survey design because we were interested in specifically  
20 outlining the impact of the presence and management of recreational fisheries. The similarity of lake  
21 environments among the two gravel pit types resulted in the most important environmental contrast  
22 among lakes being mainly the recreational use intensity.

23 As expected, managed lakes were found to be more accessible to recreationists and having more  
24 developed tracks, parking places and other facilities that attracted also other recreational uses than  
25 anglers. While the angler presence was - as expected by design - more pronounced in managed lakes,  
26 also unmanaged lakes were visited by non-angling recreationists (e.g., walkers), yet at a lower  
27 intensity. Despite the significant larger recreational use, managed lakes hosted statistical similar  
28 richness and conservation value across most taxa that we examined. Importantly, the recreational  
29 use intensity was not a significant factor in explaining the variation in species richness among the  
30 lakes we studied, and in the context of the conservation value of the species that were detected the  
31 statistical analyses showed a positive, rather than a negative, relationship of recreational use  
32 intensity for the aquatic species that we examined (waterfowl, submerged macrophytes and  
33 odonata). This finding is noteworthy for two reasons. First, it indicates that the recreational use is not

34 per se a constraint for the establishment of rare species across aquatic biodiversity. Secondly, the  
35 positive relationships of the recreational use intensity and the conservation value of selected  
36 suggests that lakes hosting rare species might be more attractive to recreationists. This can be due to  
37 two reasons. First, surveys among both the general population (Meyerhoff et al., unpublished data)  
38 and anglers (Meyerhoff, Klefoth, & Arlinghaus, in review) in our study region have shown that people  
39 value the presence of endangered species of both fish and other taxa (e.g., birds, plants) highly,  
40 increasing the attractiveness of gravel pits with increasing presence of endangered organisms (see  
41 also Fuller, Irvine, Devine-Wright, Warren, & Gaston, 2007; Rees, Rodwell, Attrill, Austen, & Mangi,  
42 2010). Secondly, habitats suitable for the aquatic species that we examined (submerged  
43 macrophytes, odonata and waterfowl) are often also very suited to fish because all taxa depend on  
44 functional littoral and riparian habitats and good water quality (Brix, DeForest, & Adams, 2001; Lenat  
45 & Crawford, 1994; Strayer & Findlay, 2010). Therefore, lakes that host rare species of the mentioned  
46 taxa, might also host attractive fish communities (Hjalmarson, 2018), in turn drawing in both anglers  
47 and non-anglers to recreate and observe and enjoy wildlife.

48 In light of previous work, we expected lakes managed by anglers to be heavily modified along the  
49 shoreline to accommodate angling sites and access to anglers (Dustin & Vondracek, 2017; O'Toole et  
50 al., 2009). Although we did record higher accessibility in angler-managed lakes (in particular the  
51 extension of trials), at the lake-level the degree of aquatic and riparian vegetation was found to be  
52 significantly larger in angler-managed systems compared to unmanaged lakes. These data show that  
53 good accessibility does not equal diminished riparian or littoral habitat quality. In fact, anglers have a  
54 strong interest to maintain access to lakes to be able to fish, but there is an equally high interest in  
55 developing habitat suitable for their targets, which can then indirectly support other biodiversity as  
56 well. The littoral zone belongs to the most productive habitats of lakes (Winfield, 2004), and many  
57 angler-targeted fish depend on underwater and riparian vegetation for spawning and for refuge  
58 (Lewin, Mehner, Ritterbusch, & Brämick, 2014; Lewin, Okun, & Mehner, 2004). In addition, crowding  
59 is a severe constraint that reduces angler satisfaction (Beardmore, Hunt, Haider, Dorow, &  
60 Arlinghaus, 2015). Therefore, although anglers regularly engage in shoreline development activities  
61 and angling site maintenance, our data suggest they do so to a degree that maintains or even  
62 extends aquatic and riparian vegetation. In fact, by far most of our gravel pit lakes offered angling  
63 sites in a mosaic fashion, where small patches accessible to people were interrupted by long  
64 stretches of fully vegetated shorelines. Some angler clubs also implemented protected zones where  
65 access to shorelines is prohibited to allow fish and wildlife to seek refuge. Collectively, these actions  
66 seem to produce well developed vegetation gradients that were, on average, larger in extension  
67 compared to unmanaged lakes.

68 Mosaics of different habitats (reeds, overhanging trees etc.) constitute highly suitable habitat for a  
69 range of taxa (Kaufmann et al., 2014), and relatedly we also found that lakes hosting a stronger  
70 vegetation gradient offered higher species richness of submerged macrophytes and odonata. By  
71 contrast, extended woody habitat both in water and particularly in the riparian zone was correlated  
72 with increased tree diversity, but reduced riparian diversity of herb species, amphibians and  
73 songbirds as well as reduced conservation value of songbirds. Perhaps, the regular shoreline  
74 development activities by anglers create disturbances that regularly interrupt the successions of tree  
75 stands thereby reducing the shading effects of the riparian zone, in turn creating diverse habitats of  
76 herb and reed habitats important for a range of species (Coomes & Grubb, 2000; Hecnar &  
77 M'Closkey, 1998; Mabry & Dettman, 2010; Monk & Gabrielson, 1985; Paracuellos, 2006; Remsburg &  
78 Turner, 2009; Shulse et al., 2010; Whitaker & Montevecchi, 1999).

79 The multivariate analyses showed that the different taxa did not vary uniformly in terms of richness  
80 and conservation value among lakes, i.e., lakes that offer high richness for a particular taxon may not  
81 be offering high richness for another. This finding disagrees with a related study from managed  
82 ponds by Lemmens et al. (2013). These authors examined aquatic taxa (zooplankton, plants,  
83 macrobenthos), revealing uniform responses in species richness across taxa and lakes. Given that  
84 we examined both aquatic and riparian taxa, the lack of uniform responses can be explained by taxa-  
85 specific habitat requirements that strongly differ among species that depend purely on in-lake  
86 conditions (e.g., macrophytes) compared to those that are more strongly governed by land use  
87 practices (e.g., amphibians).

88 Our analysis indicated that the variation in species richness is most strongly governed by available  
89 habitat and habitat quality (in particular related to vegetation and woody habitat), the morphology,  
90 area and slope steepness of a lake and the location to human settlements (represented by degree of  
91 "rurality"). The relationship between woody habitat and riparian vegetation can be explained by the  
92 shading effect of trees (at the shore or fallen in the water) on herbal vegetation (Balandier et al.,  
93 2008; Monk & Gabrielson, 1985), which leads to less vegetation cover and therefore to reduced  
94 species richness following species-area-relationships (Brown, 1995). Also, macrophyte and odonata  
95 species richness were positively correlated with vegetated habitat, but also with further distance to  
96 human infrastructures. It is obvious that with more macrophyte coverage we can expect more  
97 macrophyte species to occur. However, also the donata species profit from more vegetated littoral  
98 habitats. This finding is supported by other studies (Foote & Rice Hornung, 2005; Mabry & Dettman,  
99 2010; Remsburg & Turner, 2009).

100 Compared to the among-lake variation in species richness, the conservation value of the detected  
101 species was much more random and less clearly correlated with overarching environmental factors,  
102 which can be explained by the fact that the conservation value is driven by rare species which will

103 have very specific habitat requirements (e.g., Lindenmayer, 1989; Magurran & Henderson, 2003) and  
104 are also more likely missed in field surveys (Bäumler, Moser, Gygax, Latour, & Wyler, 2005; Gu &  
105 Swihart, 2004; Yoccoz, Nichols, & Boulinier, 2001; Zhang et al., 2014). Importantly for our paper,  
106 however, when accounting for environmental factors fisheries management dropped out as a  
107 relevant predictor of species richness, and recreational use intensity as key differences among  
108 managed and unmanaged lakes was positively, rather than negatively, associated with the  
109 conservation value of aquatic taxa.

110 The only taxon where we observed faunal breaks and substantial turn over among managed and  
111 unmanaged lakes were submerged macrophytes, but to our surprise the extension, diversity and  
112 conservation value of submerged macrophytes was higher in managed compared to unmanaged  
113 lakes. Submerged macrophytes are thought to be strongly affected by popular fisheries-  
114 management actions, particularly the promotion of benthivorous fish such as common carp through  
115 stocking (Miller & Crowl, 2006). Submerged macrophytes can also interfere with angling activities  
116 and may then be selectively removed. We have no evidence the latter activity happened in the lakes  
117 that we examined. In relation to the impact of benthivorous fish, Matern et al. (in press) studied  
118 some of the lakes that we examined revealing that managed and unmanaged lakes hosted similar  
119 biomasses and abundances of fishes. However, given the gears that were used (electrofishing and gill  
120 nets) it is likely that Matern et al. (in press) underestimated the abundance and biomass of common  
121 carp and other large benthivorous fish (Ravn et al., 2019), which can be expected to be substantially  
122 more abundant in managed gravel pit lakes. Bajer, Sullivan, & Sorensen (2009) reported a substantial  
123 reduction of species richness and extension of macrophytes in North American lakes, and Vilizzi,  
124 Tarkan, & Copp (2015) conducted a meta-analysis showing that carp-induced impacts on submerged  
125 macrophytes are most likely at biomasses well beyond 200 kg/ha. It is highly unlikely that the lakes  
126 we studied offered such carp biomasses as all lakes were mesotrophic, and these systems rarely can  
127 support more than 200-500 kg of fish of all species altogether (Barthelmes, 1981). Although we have  
128 no absolute biomass data of carp or other species, the fact that submerged macrophytes were more  
129 diverse and more extended in the angler-managed lakes suggests that co-existence of carp and other  
130 fish with a species rich macrophyte community, also in terms of threatened stonewort species (*Chara*  
131 *sp.*, *Nitella sp.*), in recreationally managed lakes is possible. This is in contrast to the common  
132 assumption that most angler-managed lakes should have less macrophytes (Van de Weyer, Meis, &  
133 Krautkrämer, 2015). The reason might be the “intermediate disturbance effect” (Connell, 1978), that  
134 leads to better conditions, especially for pioneer species, than extremely disturbed or stable systems  
135 would generate.

136 We found no differences in average species richness and conservation value for most of taxa we  
137 examined (macrophytes, odonata, herbs, trees, waterfowl, songbirds) among managed and

138 unmanaged lakes. The only exception were amphibians whose conservation value was significantly  
139 greater in unmanaged compared to managed lakes. One reason could be that managed gravel pit  
140 lakes host a greater diversity of predatory fishes with rather large gapes, in turn the predation  
141 pressure on tadpoles and even adult amphibians (e.g., through pike, *Esox lucius*) is likely greater in  
142 managed compared to unmanaged lakes. However, the general amphibian diversity was very low  
143 across all lakes. Typically only 1 to 3 species were detected. This is likely the result of the specific  
144 habitat conditions in gravel pit lakes that render these systems a suboptimal habitat for amphibians.  
145 Both managed and unmanaged lakes host fish (Matern et al., in press), lakes are rather steeply  
146 sloped and they are located in agricultural and urbanized landscapes with little forest canopy. Other  
147 studies also showed that amphibian species richness is promoted by littoral vegetation (Hecnar &  
148 M'Closkey, 1998; Shulse et al., 2010), but also habitat heterogeneity and shallow lakes can promote  
149 species richness (Atauri & de Lucio, 2001; Porej & Hetherington, 2005). All of these conditions are  
150 key preferences for the life-cycle and recruitment of amphibians (Trochet et al., 2014), indicating that  
151 alternative habitats might be more important targets for amphibian conservation (e.g., temporarily  
152 drained ponds or small kettle ponds) than gravel pit lakes (Porej & Hetherington, 2005).

153 Previous work has repeatedly shown or implicated strong reductions in bird biodiversity through  
154 human disturbances, including anglers (Bezzel & Reichholf, 1974; Knight & Gutzwiller, 1995; Lozano  
155 & Malo, 2013). However, we found similar species richness and conservation value of both waterfowl  
156 and riparian songbirds in managed and unmanaged lakes. The multivariate analyses showed that the  
157 species richness of waterfowl was strongly governed by the lake area and the steepness of the  
158 shoreline, which can be interpreted as larger and shallower lakes having a higher richness of  
159 waterfowl species than smaller and deeper lakes, confirming earlier findings (M. C. Bell, Delany,  
160 Millett, & Pollitt, 2018; Elmberg, Nummi, Poysa, & Sjoberg, 2006; Paszkowski & Tonn, 2000; Scheffer  
161 et al., 2006). Importantly, the recreational use intensity was positively, not negatively, associated  
162 with the conservation value of waterfowl present at gravel pits, and generally higher conservation  
163 values of waterfowl, macrophytes and odonata were revealed in angler-managed lakes. The songbird  
164 diversity and their conservation value showed no relationships to our indicators of recreational  
165 intensity and instead responded negatively to an index of extension of woody habitat, and when  
166 management was used as categorical variable there was only a non-significant trend for the riparian  
167 diversity of amphibians, herbs and songbirds to be elevated in unmanaged lakes. When considering  
168 further environmental variables, this trend vanished. Most studies dealing with songbirds focus on  
169 terrestrial habitats, finding that habitat heterogeneity and forests promote species richness in this  
170 taxon (Atauri & de Lucio, 2001; Sutter & Brigham, 1998; Tellería, Santos, Sánchez, & Galarza, 1992).  
171 Only few studies look at riparian songbirds, revealing positive effects of reed and tall herbaceous  
172 structure and/or intermediate forests (e.g., shrubs) if considering a smaller spatial scale such as ours  
173 (Paracuellos, 2006; Triquet, McPeck, & McComb, 1990; Whitaker & Montevecchi, 1999). This



174 essential habitat will be negatively affected by extensive woody habitat (i.e., large trees; see Coomes  
175 & Grubb, 2000; Monk & Gabrielson, 1985), explaining the correlations of our study.

176 Importantly, and collectively, our data do not support any negative impact of either recreational  
177 fisheries management or recreational use intensity on the species richness and conservation value of  
178 waterfowl and songbirds present at gravel pit lakes. It is important to note that we examined whole-  
179 lake metrics and did not examine abundances or breeding successes. Also, our work constitutes a  
180 comparative approach where lakes were not randomly allocated to either angler managed or  
181 controls. Therefore, we cannot conclusively state that recreational fishing will not impact bird  
182 populations. However, also many of the already published studies on the topic of angler impacts on  
183 bird populations are inconclusive by focusing on poor metrics of impacts (e.g., only behavioural  
184 metrics, such as flight initiation distance, rather than species presence/absence; see Bötsch,  
185 Gugelmann, Tablado, & Jenni, 2018; Bötsch, Tablado, & Jenni, 2017), only representing site rather  
186 than lake-levels (Knight et al., 1991; Reichholf, 1988; Yalden, 1992), not controlling for the impact of  
187 unaccounted environmental factors (Knight et al., 1991; Reichholf, 1988; Yalden, 1992) or lacking  
188 controls entirely (Reichholf, 1970; Yalden, 1992). The study by Cryer, Linley, Ward, Stratford, &  
189 Randerson (1987) conducted in artificial lakes revealed only distributional changes of waterfowl to  
190 the presence of anglers, but no changes to abundance. Similar results of negligible effects of anglers  
191 on birds were reported by Somers, Heisler, Doucette, Kjoss, & Brigham (2015). Specific at gravel pit  
192 lakes, Bell et al. (2018) failed to find evidence for recreational use impacts on community structure of  
193 waterfowl, but selected species, in particular diving waterfowl, responded through reduced  
194 abundance to the presence of anglers and other recreationists. Yet, other environmental factors  
195 related to habitat quality and size of the ecosystem were typically more important than the use of  
196 the shoreline by anglers, and management of shorelines benefited grazing waterfowl by opening up  
197 sites among the terrestrial and aquatic habitats (Bell et al. 2018). Collectively, the often-cited  
198 assumption that anglers alter species diversity of birds (Bezzel & Reichholf, 1974; Knight & Gutzwiller,  
199 1995; Lozano & Malo, 2013), may not necessarily hold, and in the present work in gravel pits no  
200 impacts at the species presence levels were detected compared to unmanaged lakes.

201 Our study has a number of limitations. The first relates to the fact that we used a space-for-time  
202 replication design that lends itself to a correlational study that has to be interpreted in light of the  
203 gradients that we were able to sample. Obviously, environmental variables differing from the ones  
204 we observed may lead to different conclusions (e.g., higher recreational use intensity than present in  
205 our landscape). Secondly, all our lakes were situated in agricultural environments and we lacked any  
206 lakes without any form of recreational use. This “background disturbance” (Liley, Underhill-Day,  
207 Panter, Marsh, & Roberts, 2015), either through recreation or other human-induced disturbances  
208 (e.g., noise from railways or roads) may have affected the species pool to be sampled independent of

209 our variables of interest. There is also the possibility for sampling effects, especially for seasonal and  
210 migratory taxa (e.g., odonata, amphibians, waterfowl), and we thus likely missed rare species (Yoccoz  
211 et al., 2001). We think, however, that a possible bias in the sampling would not affect our conclusions  
212 by being a systematic effect affecting both lake types. Finally, the recreational use we measured was  
213 directly captured mainly during weekdays when we did the field visits at the lakes. We might thus  
214 have undersampled high intensity phases during the weekends. However, as we used further  
215 surrogates in multivariate indexes of recreational use (e.g., litter, angling sites, trails etc.), we have  
216 identified what we consider a robust dimension of recreational use. However, this index integrated  
217 both anglers and non-anglers such that our study ultimately cannot conclusively disentangle the  
218 isolated effect of angling-induced disturbances from other recreational impacts in angler-managed  
219 lakes.

## 220 **Conclusions**

221 Our study shows that the presence of anglers and actions associated with recreational fisheries  
222 management, even if it is affecting the fish communities via adding piscivorous and other highly  
223 demanded species to gravel pits (see Matern et al., in press), is not a constraint to the establishment  
224 of a rich biodiversity of aquatic and riparian taxa traditionally not considered from a fisheries  
225 perspective. The different taxa that we investigated did not respond uniformly to the presence of  
226 fisheries-management and were driven by a set of habitat- and other environmental factors  
227 unrelated to recreational use intensity. Thus, when judged on the metrics used in our work (species  
228 richness and conservation value of the species pool) co-existence of recreational fisheries and  
229 aquatic and riparian biodiversity of high conservation value and richness is possible under the specific  
230 ecological conditions offered by gravel pit lakes in agricultural landscapes. When examined as a  
231 whole, given the negligible differences in both species diversity and conservation value across most  
232 taxa in managed and unmanaged lakes and in light of the lack of faunal breaks observed for most of  
233 the taxa we studied, our study does not support the idea that selectively constraining recreational  
234 fishing from gravel pit lakes will offer substantial conservation gains, as long as other recreational  
235 uses continue to be present and lakes are situated in disturbed cultural landscapes. Instead, we  
236 recommend specifically considering the location of specific lakes in the landscape when deciding  
237 about local and lake-specific conservation actions (Lemmens et al., 2015; Werneke, Kosmac, van de  
238 Weyer, Gertzen, & Mutz, 2018). We also propose to work together with anglers and attempt to  
239 create and maintain a mosaic of different habitat types in the riparian zone of lakes, thereby  
240 fostering the co-existence of people and nature for the benefit of all. By contrast, selective bans of  
241 anglers from gravel pit lakes with the aim to foster species richness and conservation value of  
242 selected taxa is not supported under the conditions offered by gravel pit lakes in Lower Saxony.  
243 These results likely hold for many other states in highly populated states. While gravel pits are

244 suitable habitats for a range of species, effective amphibian conservation seems impossible in these  
245 systems. Instead, fish free ponds and other temporary waters maybe needed to effectively address  
246 the current crisis in amphibian diversity (Lemmens et al., 2015; Werneke et al., 2018).

## Acknowledgements

1 We want to thank Sven Matern for his help in any stage of this study and we thank Charlotte  
2 Robinchon for her dead-wood-sampling-internship. We also thank Leander Höhne, Jasper Munich,  
3 Nicola Wegener, Jara Niebuhr, Natalie Arnold and Stéphane Mutel for their help with field sampling  
4 and data analysis. We thank Christopher Monk, Pieter Lemmens, Miguel Palmer and Petr Zajicek for  
5 their helping advices and ideas during data processing, analysis and interpretation. For the chemical  
6 analysis we thank Tobias Goldhammer and the CAB lab of IGB. For chlorophyll a analysis we thank  
7 Barbara Stein. Moreover, we thank Angelsportverein Leer u. Umgebung e.V., Bezirksfischereiverband  
8 für Ostfriesland e.V., Angler-Verein Nienburg e.V., ASV Neustadt am Rübenberge e.V., Fischereiverein  
9 Hannover e.V., Niedersächsisch-Westfälische Anglervereinigung e.V., Heike Vullmer and the Stiftung  
10 Naturschutz im Landkreis Rotenburg (Wümme), Henning Scherfeld, FV Peine-Ilse u. Umgebung  
11 e.V., SFV Helmstedt u. Umgebung e.V., Verein der Sportfischer Verden (Aller) e.V., Verein für  
12 Fischerei und Gewässerschutz Schönewörde u. Umgebung e.V., Steffen Göckemeyer, the Xella  
13 Kalksandsteinwerke Niedersachsen GmbH & Co. KG, Thomas Reimer, Melanie and Heinz H.  
14 Nordmeyer, Achaz von Hardenberg, Johann Augustin, Dieter Klensang, Elke Dammann, Cordula Stein  
15 and Holcim Germany, and the Angling Association of Lower Saxony for participating in this study.  
16 Additional we thank the funding bodies of the STÖRBAGGER-Project, namely the Landesverband  
17 Sächsischer Angler e.V., the Landesfischereiverband Bayern e.V., and the Angling Association of  
18 Lower Saxony (<https://www.ifishman.de/en/projects/stoerbagger/>). The presented study was  
19 financed by the German Federal Ministry of Education and Research (BMBF) and the Federal Agency  
20 for Nature Conservation (BfN) within the BAGGERSEE-Projekt (grant number: 01LC1320A;  
21 [www.baggersee-forschung.de](http://www.baggersee-forschung.de)). Additional funding was provided by the Stiftung Fischerei, Umwelt-  
22 und Naturschutz Deutschland (FUND Stiftung).

## References

- 1 Abell, R. (2002). Conservation Biology for the Biodiversity Crisis: A freshwater follow-up. *Conservation*  
2 *Biology*, 16(5), 1435–1437. <https://doi.org/10.1046/j.1523-1739.2002.01532.x>
- 3 AdV - Working Committee of the Surveying Authorities of the States of the Federal Republic of  
4 Germany. (2006). *Documentation on the Modelling of Geoinformation of Official Surveying and*  
5 *Mapping (GeoInfoDok )* (S. Afflerbach & W. Kunze, Eds.). Retrieved from [http://www.adv-](http://www.adv-online.de/AAA-Modell/Dokumente-der-GeoInfoDok/GeoInfoDok-6.0/)  
6 [online.de/AAA-Modell/Dokumente-der-GeoInfoDok/GeoInfoDok-6.0/](http://www.adv-online.de/AAA-Modell/Dokumente-der-GeoInfoDok/GeoInfoDok-6.0/)
- 7 Altmüller, R., & Clausnitzer, H.-J. (2010). Rote Liste der Libellen Niedersachsens und Bremens: 2.  
8 Fassung, Stand 2007. *Informationsdienst Naturschutz Niedersachsen*, 30, 211–238.
- 9 Arlinghaus, R. (2005). A conceptual framework to identify and understand conflicts in recreational  
10 fisheries systems, with implications for sustainable management. *Aquatic Resources, Culture*  
11 *and Development*, 1(2), 145–174.
- 12 Arlinghaus, R., Abbott, J. K., Fenichel, E. P., Carpenter, S. R., Hunt, L. M., Alós, J., ... Manfredo, M. J.  
13 (2019). Opinion: Governing the recreational dimension of global fisheries. *Proceedings of the*  
14 *National Academy of Sciences*, 116(12), 5209–5213. <https://doi.org/10.1073/pnas.1902796116>
- 15 Arlinghaus, R., Alós, J., Beardmore, B., Daedlow, K., Dorow, M., Fujitani, M., ... Wolter, C. (2017).  
16 Understanding and Managing Freshwater Recreational Fisheries as Complex Adaptive Social-  
17 Ecological Systems. *Reviews in Fisheries Science and Aquaculture*, 25(1), 1–41.  
18 <https://doi.org/10.1080/23308249.2016.1209160>
- 19 Arlinghaus, R., Cyrus, E.-M., Eschbach, E., Fujitani, M., Hühn, D., Johnston, F., ... Riepe, C. (2015).  
20 Hand in Hand für eine nachhaltige Angelfischerei. In *Berichte des IGB* (Vol. 28). Leibniz-Institut  
21 für Gewässerökologie und Binnenfischerei (IGB) im Forschungsverbund Berlin e. V.
- 22 Atauri, J. A., & de Lucio, J. V. (2001). The role of landscape structure in species richness distribution of  
23 birds , amphibians , reptiles and lepidopterans in Mediterranean landscapes. *Landscape*  
24 *Ecology*, 16, 147–159.
- 25 Bajer, P. G., Beck, M. W., Cross, T. K., Koch, J. D., Bartodziej, W. M., & Sorensen, P. W. (2016).  
26 Biological invasion by a benthivorous fish reduced the cover and species richness of aquatic  
27 plants in most lakes of a large North American ecoregion. *Global Change Biology*, 22(12), 3937–  
28 3947. <https://doi.org/10.1111/gcb.13377>
- 29 Bajer, P. G., Sullivan, G., & Sorensen, P. W. (2009). Effects of a rapidly increasing population of  
30 common carp on vegetative cover and waterfowl in a recently restored Midwestern shallow

- 31 lake. *Hydrobiologia*, 632, 235–245. <https://doi.org/10.1007/s10750-009-9844-3>
- 32 Balandier, P., Marquier, A., Dumas, Y., Gaudio, N., Philippe, G., Da Silva, D., ... Sinoquet, H. (2008).  
33 Light sharing among different forest strata for sustainable management of vegetation and  
34 regeneration. In *Forestry in achieving millennium goals* (Nov, pp. 81–86). Retrieved from  
35 <https://hal.archives-ouvertes.fr/hal-00468830/document>
- 36 Barthelmes, D. (1981). *Hydrobiologische Grundlagen der Binnenfischerei*. Jena, Germany: VEB Gustav  
37 Fischer Verlag.
- 38 Bauer, H.-G., Stark, H., & Frenzel, P. (1992). Der Einfluss von Störungen auf überwinternde  
39 Wasservögel am westlichen Bodensee. *Der Ornithologische Beobachter*, 89, 93–110.
- 40 Bäumler, B., Moser, D. M., Gygax, A., Latour, C., & Wyler, N. (2005). Fortschritte in der floristik der  
41 schweizer flora (gefäß pflanzen) 69. Folge (vergleiche des verbreitungsatlas mit den ersten  
42 daten 2001-2003 des Biodiversitäts-Monitoring Schweiz). *Botanica Helvetica*, 115(1), 83–93.  
43 <https://doi.org/10.1007/s00035-005-0712-0>
- 44 Beardmore, B., Hunt, L. M., Haider, W., Dorow, M., & Arlinghaus, R. (2015). Effectively managing  
45 angler satisfaction in recreational fisheries requires understanding the fish species and the  
46 anglers. *Canadian Journal of Fisheries and Aquatic Sciences*, 72, 500–513.  
47 <https://doi.org/10.1139/cjfas-2014-0177>
- 48 Bell, M. C., Delany, S. N., Millett, M. C., & Pollitt, M. S. (2018). Wintering waterfowl community  
49 structure and the characteristics of gravel pit lakes. *Wildlife Biology*, 3, 65–78.  
50 <https://doi.org/10.2981/wlb.1997.009>
- 51 Bell, D. V., & Austin, L. W. (1985). The game-fishing season and its effects on overwintering wildfowl.  
52 *Biological Conservation*, 33(1), 65–80. [https://doi.org/https://doi.org/10.1016/0006-](https://doi.org/https://doi.org/10.1016/0006-3207(85)90005-9)  
53 [3207\(85\)90005-9](https://doi.org/https://doi.org/10.1016/0006-3207(85)90005-9)
- 54 Bezzel, E., & Reichholf, J. (1974). Die Diversität als Kriterium zur Bewertung der Reichhaltigkeit von  
55 Wasservogel-Lebensräumen. *Journal Für Ornithologie*, 115(1), 50–61.
- 56 BfN. (2012). Internethandbuch zu den Arten der FFH-Richtlinie Anhang IV: Amphibien. Retrieved June  
57 6, 2018, from <https://ffh-anhang4.bfn.de/arten-anhang-iv-ffh-richtlinie/amphibien.html/>
- 58 Biggs, J., von Fumetti, S., & Kelly-Quinn, M. (2017). The importance of small waterbodies for  
59 biodiversity and ecosystem services: implications for policy makers. *Hydrobiologia*, 793(1), 3–  
60 39. <https://doi.org/10.1007/s10750-016-3007-0>
- 61 BirdLife International. (2015). *European Red List of Birds*. Luxembourg: Office for Official Publications

- 62 of the European Communities.
- 63 Blanchet, F. G., Legendre, P., & Borcard, D. (2008). Forward Selection of Explanatory Variables.  
64 *Ecology*, 89(9), 2623–2632. Retrieved from <https://www.jstor.org/stable/27650800>
- 65 Blanchette, M. L., & Lund, M. A. (2016). Pit lakes are a global legacy of mining: an integrated  
66 approach to achieving sustainable ecosystems and value for communities. *Current Opinion in*  
67 *Environmental Sustainability*, 23, 28–34. <https://doi.org/10.1016/j.cosust.2016.11.012>
- 68 Bonanno, S. E., Leopold, D. J., & Hilaire, L. R. S. (1998). Vegetation of a Freshwater Dune Barrier  
69 Under High and Low Recreational Uses. *Journal of the Torrey Botanical Society*, 125(1), 40–50.  
70 <https://doi.org/10.1007/s12224-015-9230-z>
- 71 Bonnaud, E., Berger, G., Bourgeois, K., Legrand, J., & Vidal, E. (2012). Predation by cats could lead to  
72 the extinction of the Mediterranean endemic Yelkouan Shearwater *Puffinus yelkouan* at a  
73 major breeding site. *Ibis*, 154(3), 566–577. <https://doi.org/10.1111/j.1474-919X.2012.01228.x>
- 74 Bötsch, Y., Gugelmann, S., Tablado, Z., & Jenni, L. (2018). Effect of human recreation on bird anti-  
75 predatory response. *PeerJ*, 6, e5093. <https://doi.org/10.7717/peerj.5093>
- 76 Bötsch, Y., Tablado, Z., & Jenni, L. (2017). Experimental evidence of human recreational disturbance  
77 effects on bird-territory establishment. *Proceedings of the Royal Society B: Biological Sciences*,  
78 284(1858). <https://doi.org/10.1098/rspb.2017.0846>
- 79 Braun-Blanquet, J. (1964). *Pflanzensoziologie: Grundzüge der Vegetationskunde* (3rd ed.).  
80 <https://doi.org/10.1007/978-3-7091-4078-9>
- 81 Brauns, M., Garcia, X.-F., Walz, N., & Pusch, M. T. (2007). Effects of human shoreline development on  
82 littoral macroinvertebrates in lowland lakes. *Journal of Applied Ecology*, 44, 1138–1144.  
83 <https://doi.org/10.1111/j.1365-2664.2007.01376.x>
- 84 Brix, K. V., DeForest, D. K., & Adams, W. J. (2001). Assessing acute and chronic copper risks to  
85 freshwater aquatic life using species sensitivity distributions for different taxonomic groups.  
86 *Environmental Toxicology and Chemistry*, 20(8), 1846–1856. Retrieved from  
87 <https://onlinelibrary.wiley.com/doi/pdf/10.1002/etc.5620200831>
- 88 Brooks, T. M., Mittermeier, R. A., da Fonseca, G. A., Gerlach, J., Hoffmann, M., Lamoreux, J. F., ...  
89 Rodrigues, A. S. (2006). Global biodiversity conservation priorities. *Science*, 313(5783), 58–61.  
90 <https://doi.org/10.1126/science.1127609>
- 91 Brown, J. H. (1995). *Macroecology*. Chicago, Illinois, USA: University of Chicago Press.

- 92 Burger, J., & Gochfeld, M. (1998). Effects of ecotourists on bird behaviour at Loxahatchee National  
93 Wildlife Refuge, Florida. *Environmental Conservation*, 25(1), 13–21.  
94 <https://doi.org/10.1017/S0376892998000058>
- 95 Butchart, S. H. M., Walpole, M., Collen, B., Van Strien, A., Scharlemann, J. P. W., Almond, R. E. A., ...  
96 Watson, R. (2010). Global biodiversity: Indicators of recent declines. *Science*, 328(5982), 1164–  
97 1168. <https://doi.org/10.1126/science.1187512>
- 98 Carreira, B. M., Dias, M. P., & Rebelo, R. (2014). How consumption and fragmentation of  
99 macrophytes by the invasive crayfish *Procambarus clarkii* shape the macrophyte communities  
100 of temporary ponds. *Hydrobiologia*, 721(1), 89–98. <https://doi.org/10.1007/s10750-013-1651-1>
- 101 Ceballos, G., García, A., & Ehrlich, P. R. (2010). The Sixth Extinction Crisis Loss of Animal Populations  
102 and Species. *Journal of Cosmology*, 8, 1821–1831.
- 103 Clausnitzer, V., Kalkman, V. J., Ram, M., Collen, B., Baillie, J. E. M., Bedjanič, M., ... Wilson, K. (2009).  
104 Odonata enter the biodiversity crisis debate: The first global assessment of an insect group.  
105 *Biological Conservation*, 142, 1864–1869. <https://doi.org/10.1016/j.biocon.2009.03.028>
- 106 Connell, J. H. (1978). Diversity in tropical rain forests and coral reefs. *Science*, 199(4335), 1302–1310.
- 107 Cooke, A. S. (1974). The effects of fishing on waterfowl at Grafham Water. *Reports of the Cambridge*  
108 *Bird Club*, 48, 40–46.
- 109 Coomes, D. A., & Grubb, P. J. (2000). Impacts of root competition in forests and woodlands: a  
110 theoretical framework and review of experiments. *Ecological Monographs*, 70(2), 171–207.
- 111 Cryer, M., Linley, N. W., Ward, R. M., Stratford, J. O., & Randerson, P. F. (1987). Disturbance of  
112 overwintering wildfowl by anglers at two reservoir sites in south wales. *Bird Study*, 34(3), 191–  
113 199. <https://doi.org/10.1080/00063658709476961>
- 114 Daedlow, K., Beard, T. D. jr., & Arlinghaus, R. (2011). A property rights-based view on management of  
115 inland recreational fisheries: contrasting common and public fishing rights regimes in Germany  
116 and the United States. *American Fisheries Society Symposium*, 75, 13–38.
- 117 Damnjanović, B., Novković, M., Vesić, A., Živković, M., Radulović, S., Vukov, D., ... Cvijanović, D.  
118 (2018). Biodiversity-friendly designs for gravel pit lakes along the Drina River floodplain (the  
119 Middle Danube Basin, Serbia). *Wetlands Ecology and Management*, 27, 1–22.  
120 <https://doi.org/10.1007/s11273-018-9641-8>
- 121 Danylchuk, A. J., & Cooke, S. J. (2011). Engaging the Recreational Angling Community to Implement  
122 and Manage Aquatic Protected Areas. *Conservation Biology*, 25(3), 458–464.



- 123 <https://doi.org/10.1111/j.1523-1739.2010.01631.x>
- 124 de Boer, W. F., & Longamane, F. A. (1996). The Exploitation of Intertidal Food Resources in Inhaca  
125 Bay, Mozambique, by Shorebirds and Humans. *Biological Conservation*, 78, 295–303.
- 126 De Meester, L., Declerck, S., Stoks, R., Louette, G., Van De Meutter, F., De Bie, T., ... Brendonck, L.  
127 (2005). Ponds and pools as model systems in conservation biology, ecology and evolutionary  
128 biology. *Aquatic Conservation: Marine and Freshwater Ecosystems*, 15(6), 715–725.  
129 <https://doi.org/10.1002/aqc.748>
- 130 Dear, E. J., Guay, P.-J., Robinson, R. W., & Weston, M. A. (2015). Distance from shore positively  
131 influences alert distance in three wetland bird species. *Wetlands Ecology and Management*,  
132 23(2), 315–318. <https://doi.org/10.1007/s11273-014-9376-0>
- 133 DeBoom, C. S., & Wahl, D. H. (2013). Effects of Coarse Woody Habitat Complexity on Predator-Prey  
134 Interactions of Four Freshwater Fish Species. *Transactions of the American Fisheries Society*,  
135 142(6), 1602–1614. <https://doi.org/10.1080/00028487.2013.820219>
- 136 Delvoie, S., Zhao, Z., Michel, F., & Courard, L. (2019). Market analysis of recycled sands and  
137 aggregates in NorthWest Europe: drivers and barriers. *IOP Conference Series: Earth and  
138 Environmental Science*, 225, 012055. <https://doi.org/10.1088/1755-1315/225/1/012055>
- 139 Dierschke, V. (2016). *Welcher Vogel ist das?: 170 Vögel einfach bestimmen*. Kosmos.
- 140 DIN EN 1484. (1997). *Water analysis - Guidelines for the determination of total organic carbon (TOC)  
141 and dissolved organic carbon (DOC)*.
- 142 DIN EN ISO 13395. (1996). *Water quality - Determination of nitrite nitrogen and nitrate nitrogen and  
143 the sum of both by flow analysis (CFA and FIA) and spectrometric detection (ISO 13395:1996)*.
- 144 Dudgeon, D., Arthington, A. H., Gessner, M. O., Kawabata, Z.-I., Knowler, D. J., Lévêque, C., ... Sullivan,  
145 C. A. (2006). Freshwater biodiversity: importance, threats, status and conservation challenges.  
146 *Biological Reviews of the Cambridge Philosophical Society*, 81(2), 163–182.  
147 <https://doi.org/10.1017/S1464793105006950>
- 148 Dustin, D. L., & Vondracek, B. (2017). Nearshore Habitat and Fish Assemblages along a Gradient of  
149 Shoreline Development. *North American Journal of Fisheries Management*, 37(2), 432–444.  
150 <https://doi.org/10.1080/02755947.2017.1280567>
- 151 Elmberg, J., Nummi, P., Poysa, H., & Sjöberg, K. (2006). Relationships Between Species Number, Lake  
152 Size and Resource Diversity in Assemblages of Breeding Waterfowl. *Journal of Biogeography*,  
153 21(1), 75. <https://doi.org/10.2307/2845605>

- 154 Elo, M., Penttinen, J., & Kotiaho, J. S. (2015). The effect of peatland drainage and restoration on  
155 Odonata species richness and abundance. *BMC Ecol*, *15*, 11. [https://doi.org/10.1186/s12898-](https://doi.org/10.1186/s12898-015-0042-z)  
156 015-0042-z
- 157 Emmrich, M., Schällicke, S., Hühn, D., Lewin, C., & Arlinghaus, R. (2014). No differences between  
158 littoral fish community structure of small natural and gravel pit lakes in the northern German  
159 lowlands. *Limnologica*, *46*, 84–93. <https://doi.org/10.1016/j.limno.2013.12.005>
- 160 EN ISO 11732. (2005). *Water quality - Determination of ammonium nitrogen - Method by flow*  
161 *analysis (CFA and FIA) and spectrometric detection (ISO 11732:1997)*.
- 162 EN ISO 6878. (2004). *Water quality - Determination of phosphorus - Ammonium molybdate*  
163 *spectrometric method (ISO 6878:1998)*.
- 164 Erlinger, G. (1981). Der Einflußkurz- bzw. langfristiger Störungen auf Wasservogelbrutbestände. *Öko-*  
165 *L*, *3*(4), 16–19.
- 166 Europäisches Parlament & Rat der europäischen Union. Richtlinie 2009/147/EG des europäischen  
167 Parlaments und des Rates über die Erhaltung wildlebender Vogelarten. , Amtsblatt der  
168 Europäischen Union § (2009).
- 169 European Aggregates Association (UEPG). (2017). Estimates of Aggregates Production data 2017.  
170 Retrieved May 2, 2019, from [http://www.uepg.eu/statistics/estimates-of-production-](http://www.uepg.eu/statistics/estimates-of-production-data/data-2017)  
171 [data/data-2017](http://www.uepg.eu/statistics/estimates-of-production-data/data-2017)
- 172 Ezekiel, M. (1930). Methods of correlation analysis. In *Methods of correlation analysis*. Oxford,  
173 England: Wiley.
- 174 Fernández-Juricic, E. (2002). Can human disturbance promote nestedness? A case study with  
175 breeding birds in urban habitat fragments. *Oecologia*, *131*(2), 269–278.  
176 <https://doi.org/10.1007/s00442-002-0883-y>
- 177 Foote, A. L., & Rice Hornung, C. L. (2005). Odonates as biological indicators of grazing effects on  
178 Canadian prairie wetlands. *Ecological Entomology*, *30*, 273–283.  
179 <https://doi.org/10.1111/j.0307-6946.2005.00701.x>
- 180 Franson, J. C., Hansen, S. P., Creekmore, T. E., Brand, C. J., Evers, D. C., Duerr, A. E., & DeStefano, S.  
181 (2003). Lead Fishing Weights and Other Fishing Tackle in Selected Waterbirds. *Waterbirds: The*  
182 *International Journal of Waterbird Biology*, *26*(3), 345–352. Retrieved from  
183 <https://www.jstor.org/stable/1522416>
- 184 Freyhof, J., & Brooks, E. (2011). *European Red List of Freshwater Fishes*.

- 185 <https://doi.org/10.2779/85903>
- 186 Frid, A., & Dill, L. M. (2002). Human-caused disturbance stimuli as a form of predation risk.  
187 *Conservation Ecology*, 6(1), 11[online]. Retrieved from <https://www.jstor.org/stable/26271862>
- 188 Fujitani, M., McFall, A., Randler, C., & Arlinghaus, R. (2017). Participatory adaptive management leads  
189 to environmental learning outcomes extending beyond the sphere of science. *Science Advances*,  
190 3(6), 1–12. <https://doi.org/10.1126/sciadv.1602516>
- 191 Fuller, R. A., Irvine, K. N., Devine-Wright, P., Warren, P. H., & Gaston, K. J. (2007). Psychological  
192 benefits of greenspace increase with biodiversity. *Biology Letters*, 3(4), 390–394.  
193 <https://doi.org/10.1098/rsbl.2007.0149>
- 194 Garve, E. (2004). Rote Liste und Florenliste der Farn- und Blütenpflanzen in Niedersachsen und  
195 Bremen, 5. Fassung, Stand 1.3.2004. *Informationsdienst Naturschutz Niedersachsen*, 24(1), 1–  
196 76.
- 197 Gee, A. S. (1978). The distribution and growth of coarse fish in gravel-pit lakes in south-east England.  
198 *Freshwater Biology*, 8(4), 385–394. <https://doi.org/10.1111/j.1365-2427.1978.tb01459.x>
- 199 Goëau, H., Bonnet, P., Joly, A., Affouard, A., Bakic, V., Barbe, J., ... Boujemaa, N. (2014). Pl@ntNet  
200 Mobile 2014: Android Port and New Features. *Proceedings of International Conference on*  
201 *Multimedia Retrieval*, (ii), 527:527--527:528. <https://doi.org/10.1145/2578726.2582618>
- 202 Goertzen, D., & Suhling, F. (2018). Urbanization versus other land use: Diverging effects on dragonfly  
203 communities in Germany. *Diversity and Distributions*, 25, 38–47.  
204 <https://doi.org/10.1111/ddi.12820>
- 205 Gonçalves, J., Honrado, J. P., Vicente, J. R., & Civantos, E. (2016). A model-based framework for  
206 assessing the vulnerability of low dispersal vertebrates to landscape fragmentation under  
207 environmental change. *Ecological Complexity*, 28, 174–186.  
208 <https://doi.org/10.1016/j.ecocom.2016.05.003>
- 209 Gotelli, N. J., & Colwell, R. K. (2001). Quantifying biodiversity: procedures and pitfalls in the  
210 measurement and comparison of species richness. *Ecology Letters*, 4, 379–391. Retrieved from  
211 c:%5CDocuments and  
212 Settings%5CBen%5CDesktop%5CEndNote%5Cpapers%5CGotelliAndColwell2001.pdf
- 213 Gräler, B., Pebesma, E., & Heuvelink, G. (2016). Spatio-Temporal Interpolation using gstat. *The R*  
214 *Journal*, 8(1), 204–218. Retrieved from [http://journal.r-project.org/archive/2016-1/na-](http://journal.r-project.org/archive/2016-1/na-pebesma-heuvelink.pdf)  
215 [pebesma-heuvelink.pdf](http://journal.r-project.org/archive/2016-1/na-pebesma-heuvelink.pdf)

- 216 Grünberg, C., Bauer, H.-G., Haupt, H., Hüppop, O., Ryslavy, T., & Südbeck, P. (2015). Rote Liste der  
217 Brutvögel Deutschlands, 5. Fassung, 30. November 2015. *Berichte Zum Vogelschutz*, 52, 19–67.
- 218 Gu, W., & Swihart, R. K. (2004). Absent or undetected? Effects of non-detection of species occurrence  
219 on wildlife-habitat models. *Biological Conservation*, 116(2), 195–203.  
220 [https://doi.org/10.1016/S0006-3207\(03\)00190-3](https://doi.org/10.1016/S0006-3207(03)00190-3)
- 221 Heath, A. S. A., Dahlgren, S., Simon, D., & Brooks, M. (2017). Monofilament Fishing Line as a Threat to  
222 American Oystercatchers (*Haematopus palliatus*) on the Texas Coast, USA. *Waterbirds*, 40(sp1),  
223 123. <https://doi.org/10.1675/063.040.sp101>
- 224 Hecnar, S. J., & M'Closkey, R. T. (1997). The effects of predatory fish on amphibian species richness  
225 and distribution. *Biological Conservation*, 79, 123–131. [https://doi.org/10.1016/s0006-](https://doi.org/10.1016/s0006-3207(96)00113-9)  
226 [3207\(96\)00113-9](https://doi.org/10.1016/s0006-3207(96)00113-9)
- 227 Hecnar, S. J., & M'Closkey, R. T. (1998). Species richness patterns of amphibians in southwestern  
228 Ontario ponds. *Journal of Biogeography*, 25(4), 763–772.
- 229 Hein, T. (2018). Libellenwissen. Retrieved June 6, 2018, from <https://libellenwissen.de/>
- 230 Hillebrand, H., Blasius, B., Borer, E. T., Chase, J. M., Downing, J. A., Eriksson, B. K., ... Cadotte, M.  
231 (2018). Biodiversity change is uncoupled from species richness trends: Consequences for  
232 conservation and monitoring. *Journal of Applied Ecology*, 55, 169–184.  
233 <https://doi.org/10.1111/1365-2664.12959>
- 234 Hilt, S., Alirangues Nuñez, M. M., Bakker, E. S., Blindow, I., Davidson, T. A., Gillefalk, M., ... Sayer, C. D.  
235 (2018). Response of Submerged Macrophyte Communities to External and Internal Restoration  
236 Measures in North Temperate Shallow Lakes. *Frontiers in Plant Science*, 9(February).  
237 <https://doi.org/10.3389/fpls.2018.00194>
- 238 Hjalmarson, E. A. (2018). *On the Use of Odonata as Ecological Indicators* (University of Oklahoma).  
239 <https://doi.org/10.22201/fq.18708404e.2004.3.66178>
- 240 Holmlund, C. M., & Hammer, M. (1999). Ecosystem services generated by fish populations. *Ecological*  
241 *Economics*, 29, 253–268. Retrieved from [http://files/1741/Holmlund et al\\_1999\\_Ecosystem](http://files/1741/Holmlund_et_al_1999_Ecosystem_services_generated_by_fish_populations.pdf.pdf)  
242 [services generated by fish populations.pdf.pdf](http://files/1741/Holmlund_et_al_1999_Ecosystem_services_generated_by_fish_populations.pdf.pdf)
- 243 IPBES. (2019). *Summary for policymakers of the global assessment report on biodiversity and*  
244 *ecosystem services – unedited advance version* (S. Díaz, J. Settele, E. Brondízio, H. T. Ngo, M.  
245 Guèze, J. Agard, ... H. Mooney, Eds.). Retrieved from  
246 [https://www.ipbes.net/system/tdf/spm\\_global\\_unedited\\_advance.pdf?file=1&type=node&id=](https://www.ipbes.net/system/tdf/spm_global_unedited_advance.pdf?file=1&type=node&id=)

- 247 35245
- 248 IUCN. (2018). The IUCN Red List of Threatened Species. Version 2018-1. Retrieved from  
249 <http://www.iucnredlist.org>
- 250 Johnson, B. M., Arlinghaus, R., & Martinez, P. J. (2009). Are We Doing All We Can to Stem the Tide of  
251 Illegal Fish Stocking? *Fisheries*, 34(8), 389–394. <https://doi.org/10.1577/1548-8446-34.8.389>
- 252 Kaufmann, P. R., Hughes, R. M., Whittier, T. R., Bryce, S. A., & Paulsen, S. G. (2014). Relevance of lake  
253 physical habitat indices to fish and riparian birds. *Lake and Reservoir Management*, 30(2), 177–  
254 191. <https://doi.org/10.1080/10402381.2013.877544>
- 255 Kaufmann, P. R., & Whittier, T. R. (1997). Habitat assessment. In J. R. Baker, D. V. Peck, & D. W.  
256 Sutton (Eds.), *Environmental Monitoring and Assessment Program – Surface Waters: field*  
257 *operations manual for lakes* (pp. 5–1 to 5–26). Retrieved from  
258 <https://archive.epa.gov/emap/archive-emap/web/html/97fldman.html>
- 259 Knight, R. L., Anderson, D. P., & Marr, N. V. (1991). Responses of an Avian Scavenging Guild to  
260 Anglers. *Biological Conservation*, 56(2), 195–205. [https://doi.org/10.1016/0006-3207\(91\)90017-](https://doi.org/10.1016/0006-3207(91)90017-4)  
261 4
- 262 Knight, R. L., & Gutzwiller, K. J. (1995). Recreational Disturbance and Wildlife Populations. In *Wildlife*  
263 *and Recreationists: Coexistence Through Management and Research*. Retrieved from  
264 [http://books.google.com/books?hl=en&lr=&id=BRbBAVLwQIAC&oi=fnd&pg=PR2&dq=Wildlife+](http://books.google.com/books?hl=en&lr=&id=BRbBAVLwQIAC&oi=fnd&pg=PR2&dq=Wildlife+and+Recreationists+Coexistence+through+management+and+research&ots=tLxWRTHxBC&sig=tGeL7wgT3G4a6dZOTZo3gFrX7Lg)  
265 [and+Recreationists+Coexistence+through+management+and+research&ots=tLxWRTHxBC&sig=](http://books.google.com/books?hl=en&lr=&id=BRbBAVLwQIAC&oi=fnd&pg=PR2&dq=Wildlife+and+Recreationists+Coexistence+through+management+and+research&ots=tLxWRTHxBC&sig=tGeL7wgT3G4a6dZOTZo3gFrX7Lg)  
266 [tGeL7wgT3G4a6dZOTZo3gFrX7Lg](http://books.google.com/books?hl=en&lr=&id=BRbBAVLwQIAC&oi=fnd&pg=PR2&dq=Wildlife+and+Recreationists+Coexistence+through+management+and+research&ots=tLxWRTHxBC&sig=tGeL7wgT3G4a6dZOTZo3gFrX7Lg)
- 267 Knorp, N. E., & Dorn, N. J. (2016). Mosquitofish predation and aquatic vegetation determine  
268 emergence patterns of dragonfly assemblages. *Freshwater Science*, 35(1), 114–125.  
269 <https://doi.org/10.1086/684678>
- 270 Koch, K., Wagner, C., Sahlén, G., & Tsubaki, Y. (2014). Farmland versus forest: comparing changes in  
271 Odonata species composition in western and eastern Sweden. *Insect Conservation and*  
272 *Diversity*, 7, 22–31. <https://doi.org/10.1111/icad.12034>
- 273 Kohler, A. (1978). Methoden der Kartierung von Flora und Vegetation von Süßwasserbiotopen.  
274 *Landschaft Und Stadt*, 10, 73–85.
- 275 Korsch, H., Doege, A., Raabe, U., & van de Weyer, K. (2013). Rote Liste der Armeleuchteralgen  
276 (Charophyceae) Deutschlands 3. Fassung, Stand: Dezember 2012. *Hausknechtia*, 17(November),  
277 1–32.

- 278 Kowarik, I. (2003). *Biologische Invasionen: Neophyten und Neozoen in Mitteleuropa*. Stuttgart,  
279 Germany: Verlag Eugen Ulmer.
- 280 Krüger, T., & Nipkow, M. (2015). Rote Liste der in Niedersachsen und Bremen gefährdeten  
281 Brutvogelarten, 8. Fassung, Stand 2015. *Informationsdienst Naturschutz Niedersachsen*, 35(4),  
282 181–256. Retrieved from  
283 [http://www.nlwkn.niedersachsen.de/naturschutz/veroeffentlichungen/rote-liste-der-in-](http://www.nlwkn.niedersachsen.de/naturschutz/veroeffentlichungen/rote-liste-der-in-niedersachsen-und-bremen-gefaehrdeten-brutvoegel-141167.html)  
284 [niedersachsen-und-bremen-gefaehrdeten-brutvoegel-141167.html](http://www.nlwkn.niedersachsen.de/naturschutz/veroeffentlichungen/rote-liste-der-in-niedersachsen-und-bremen-gefaehrdeten-brutvoegel-141167.html)
- 285 Kühnel, K.-D., Geiger, A., Laufer, H., Podloucky, R., & Schlüpmann, M. (2009). Rote Liste und  
286 Gesamtartenliste der Lurche (Amphibia) und Kriechtiere (Reptilia) Deutschlands [Stand  
287 Dezember 2008]. In H. Haupt, G. Ludwig, H. Gruttke, M. Binot-Hafke, C. Otto, & A. Pauly (Eds.),  
288 *Rote Liste gefährdeter Tiere, Pflanzen und Pilze Deutschlands* (Band 1: Wi, pp. 231–288).  
289 Bundesamt für Naturschutz (BfN).
- 290 Landesamt für Statistik Niedersachsen (LSN). (2018). *LSN-Online - Regionaldatenbank*. Hannover,  
291 Germany.
- 292 Landkreis Lüneburg. *Verordnung über das Naturschutzgebiet „Elbeniederung von Hohnstorf bis*  
293 *Artlenburg“ im Flecken Artlenburg und in der Gemeinde Hohnstorf/Elbe in der Samtgemeinde*  
294 *Scharnebeck im Landkreis Lüneburg*. , (2018).
- 295 Landkreis Nienburg/Weser. *Landschaftsrahmenplan des Landkreises Nienburg/Weser, Entwurf*  
296 *Oktober 2018*. , (2018).
- 297 Larson, C. L., Reed, S. E., Merenlender, A. M., & Crooks, K. R. (2016). Effects of recreation on animals  
298 revealed as widespread through a global systematic review. *PLoS ONE*, 11(12), e0167259.  
299 <https://doi.org/10.1371/journal.pone.0167259>
- 300 Le Corre, N., Gélinaud, G., & Brigand, L. (2009). Bird disturbance on conservation sites in Brittany  
301 (France): The standpoint of geographers. *Journal of Coastal Conservation*, 13(2), 109–118.  
302 <https://doi.org/10.1007/s11852-009-0057-8>
- 303 Lee, A. T. K., Marsden, S. J., Tatum-hume, E., & Brightsmith, D. J. (2017). The effects of tourist and  
304 boat traffic on parrot geophagy in lowland Peru. *Biotropica*, 49(5), 716–725.  
305 <https://doi.org/10.1111/btp.12426>
- 306 Legendre, P., & Legendre, L. (2012). *Numerical ecology* (3rd Editio). Elsevier.
- 307 Lehmann, A. W., & Nüss, J. H. (2015). *Libellen - Bestimmungsschlüssel für Nord- und Mitteleuropa* (6.  
308 Auflage). Göttingen, Germany: Deutscher Jugendbund für Naturbeobachtungen.

- 309 Lemmens, P., Mergeay, J., De Bie, T., Van Wichelen, J., De Meester, L., & Declerck, S. A. (2013). How  
310 to maximally support local and regional biodiversity in applied conservation? Insights from pond  
311 management. *PLoS One*, *8*, e72538. <https://doi.org/10.1371/journal.pone.0072538>
- 312 Lemmens, P., Mergeay, J., Van Wichelen, J., De Meester, L., & Declerck, S. A. (2015). The Impact of  
313 Conservation Management on the Community Composition of Multiple Organism Groups in  
314 Eutrophic Interconnected Man-Made Ponds. *PLoS One*, *10*, e0139371.  
315 <https://doi.org/10.1371/journal.pone.0139371>
- 316 Lenat, D. R., & Crawford, J. K. (1994). Effects of land use on water quality and aquatic biota of three  
317 North Carolina Piedmont streams. *Hydrobiologia*, *294*, 185–199.  
318 <https://doi.org/10.1007/BF00021291>
- 319 Lenda, M., Skórka, P., Moroń, D., Rosin, Z. M., & Tryjanowski, P. (2012). The importance of the gravel  
320 excavation industry for the conservation of grassland butterflies. *Biological Conservation*,  
321 *148*(1), 180–190. <https://doi.org/10.1016/j.biocon.2012.01.014>
- 322 Lewin, W.-C., Arlinghaus, R., & Mehner, T. (2006). Documented and potential biological impacts of  
323 recreational fishing: Insights for management and conservation. *Reviews in Fisheries Science*,  
324 *14*(4), 305–367. <https://doi.org/10.1080/10641260600886455>
- 325 Lewin, W.-C., Mehner, T., Ritterbusch, D., & Brämick, U. (2014). The influence of anthropogenic  
326 shoreline changes on the littoral abundance of fish species in German lowland lakes varying in  
327 depth as determined by boosted regression trees. *Hydrobiologia*, *724*, 293–306.  
328 <https://doi.org/10.1007/s10750-013-1746-8>
- 329 Lewin, W.-C., Okun, N., & Mehner, T. (2004). Determinants of the distribution of juvenile fish in the  
330 littoral area of a shallow lake. *Freshwater Biology*, *49*, 410–424. <https://doi.org/10.1111/j.1365-2427.2004.01193.x>
- 332 Liddle, M. J., & Scorgie, H. R. A. (1980). The effects of recreation on freshwater plants and animals: A  
333 review. *Biological Conservation*, *17*(3), 183–206. [https://doi.org/10.1016/0006-3207\(80\)90055-5](https://doi.org/10.1016/0006-3207(80)90055-5)
- 334 5
- 335 Liley, D., Underhill-Day, J., Panter, C., Marsh, P., & Roberts, J. (2015). *Morecambe Bay Bird*  
336 *Disturbance and Access Management Report. Unpublished report by Footprint Ecology for the*  
337 *Morecambe Bay Partnership.*
- 338 Lindenmayer, D. B. (1989). *The ecology and habitat requirements of Leadbeater's possum*. Australian  
339 National University, Canberra.

- 340 LÖBF NRW. (2004). *Lebensräume und Arten der FFH-Richtlinie in Nordrhein-Westfalen.*  
341 *Beeinträchtigungen, Erhaltungs- und Entwicklungsmaßnahmen, sowie Bewertung des*  
342 *Erhaltungszustandes.* Münster, Germany: Ministerium für Umwelt und Naturschutz,  
343 Landwirtschaft und Verbraucherschutz NRW.
- 344 Lozano, J., & Malo, A. F. (2013). Relationships Between Human Activity and Richness and Abundance  
345 of Some Bird Species in the Paraguay River (Pantanal, Brazil). *Ardeola*, 60(1), 99–112.  
346 <https://doi.org/10.13157/arla.60.1.2012.99>
- 347 Ludwig, G., & Schnittler, M. (1996). Rote Liste der Pflanzen Deutschlands. *Schriftenreihe Für*  
348 *Vegetationskunde*, 1–224. Retrieved from  
349 <https://www.bfn.de/fileadmin/MDB/documents/RoteListePflanzen.pdf>
- 350 Mabry, C., & Dettman, C. (2010). Odonata Richness and Abundance in Relation to Vegetation  
351 Structure in Restored and Native Wetlands of the Prairie Pothole Region, USA. *Ecological*  
352 *Restoration*, 28(4), 475–484. <https://doi.org/10.3368/er.28.4.475>
- 353 Magurran, A. E., & Henderson, P. A. (2003). Explaining the excess of rare species in natural species  
354 abundance distributions. *Nature*, 422, 714–716.
- 355 Mallory, E. C., Ridgway, M. S., Gordon, A. M., & Kaushik, N. K. (2000). Distribution of woody debris in  
356 a small headwater lake, central Ontario, Canada. *Archiv Für Hydrobiologie*, 148(4), 587–606.  
357 Retrieved from <https://www.cabdirect.org/cabdirect/abstract/20013014468>
- 358 Manning, R. E. (1979). Impacts of recreation on riparian soils and vegetation. *Journal of the American*  
359 *Water Resources Association*, 15(1), 30–43. [https://doi.org/10.1111/j.1752-](https://doi.org/10.1111/j.1752-1688.1979.tb00287.x)  
360 [1688.1979.tb00287.x](https://doi.org/10.1111/j.1752-1688.1979.tb00287.x)
- 361 Mantoura, R. F. C., & Llewellyn, C. A. (1983). The rapid determination of algal chlorophyll and  
362 carotenoid pigments and their breakdown products in natural waters by reverse-phase high-  
363 performance liquid chromatography. *Analytica Chimica Acta*, 151(C), 297–314.  
364 [https://doi.org/10.1016/S0003-2670\(00\)80092-6](https://doi.org/10.1016/S0003-2670(00)80092-6)
- 365 Mao, C. X., & Li, J. (2009). Comparing species assemblages via species accumulation curves.  
366 *Biometrics*, 65(4), 1063–1067. <https://doi.org/10.1111/j.1541-0420.2008.01182.x>
- 367 Mardia, K. V., Kent, J. T., & Bibby, J. M. (1979). *Multivariate Analysis*. London: Academic Press.
- 368 Matern, S., Emmrich, M., Klefoth, T., Wolter, C., Wegener, N., & Arlinghaus, R. (2019). Impact of  
369 recreational fisheries management on fish biodiversity in gravel pit lakes with contrasts to  
370 unmanaged lakes. *Journal of Fish Biology*, in press, 55. <https://doi.org/10.1111/jfb.13989>



- 371 Matthews, W. J. (1986). Fish faunal “breaks” and stream order in the eastern and central United  
372 States. *Environmental Biology of Fishes*, 17(2), 81–92. <https://doi.org/10.1007/BF00001739>
- 373 McFadden, T. N., Herrera, A. G., & Navedo, J. G. (2017). Waterbird responses to regular passage of a  
374 birdwatching tour boat: Implications for wetland management. *Journal for Nature Conservation*,  
375 40, 42–48. <https://doi.org/10.1016/J.JNC.2017.09.004>
- 376 Meyerhoff, J., Klefoth, T., & Arlinghaus, R. (2019). The value of artificial lake ecosystems and the  
377 value they provide to recreational anglers in relation to biodiversity, shoreline development and  
378 other recreationists: implications for management. *Environmental Management, in review*.
- 379 Miller, S. A., & Crowl, T. A. (2006). Effects of common carp (*Cyprinus carpio*) on macrophytes and  
380 invertebrate communities in a shallow lake. *Freshwater Biology*, 51(1), 85–94.  
381 <https://doi.org/10.1007/s00198-005-1915-3>
- 382 Miró, A., Sabás, I., & Ventura, M. (2018). Large negative effect of non-native trout and minnows on  
383 Pyrenean lake amphibians. *Biological Conservation*, 218, 144–153.  
384 <https://doi.org/10.1016/j.biocon.2017.12.030>
- 385 Mollema, P. N., & Antonellini, M. (2016). Water and (bio) chemical cycling in gravel pit lakes: A  
386 review and outlook. *Earth-Science Reviews*, 159, 247–270.  
387 <https://doi.org/10.1016/j.earscirev.2016.05.006>
- 388 Monk, C. D., & Gabrielson, F. C. J. (1985). Effects of Shade, Litter and Root Competition on Old-Field  
389 Vegetation in South Carolina. *Bulletin of the Torrey Botanical Club*, 112(4), 383–392. Retrieved  
390 from <https://www.jstor.org/stable/2996039>
- 391 Morin, P. J. (1984a). Odonate guild composition: experiments with colonization history and fish  
392 predation. *Ecology*, 65(6), 1866–1873.
- 393 Morin, P. J. (1984b). The impact of fish exclusion on the abundance and species composition of larval  
394 odonates: results of short-term experiments in a North Carolina farm pond. *Ecology*, 65(1), 53–  
395 60.
- 396 Müller, H. (2012). *Zulässigkeit und Grenzen der Ausgestaltung/Einschränkung von Fischereirechten an*  
397 *Baggerseen; Rechtsgutachten*. Bezirksfischereiverband Oberfranken e.V.,  
398 Landesfischereiverband Bayern e.V.
- 399 Müller, Z., Jakab, T., Tóth, A., Dévai, G., Szállassy, N., Kiss, B., & Horváth, R. (2003). Effect of sports  
400 fisherman activities on dragonfly assemblages on a Hungarian river floodplain. *Biodiversity and*  
401 *Conservation*, 12, 167–179.

- 402 Murphy, J., & Riley, J. P. (1962). A modified single solution method for the determination of  
403 phosphate in natural water. *Analytica Chimica Acta*, 27, 31–36.
- 404 Neter, J., Kutner, M. H., Nachtsheim, C. J., & Wasserman, W. (1996). *Applied linear statistical models*  
405 (Fourth Edi). Chicago, Illinois, USA: Irwin.
- 406 Newbrey, J. L., Bozek, M. A., & Niemuth, N. D. (2005). Effects of Lake Characteristics and Human  
407 Disturbance on the Presence of Piscivorous Birds in Northern Wisconsin, USA. *Waterbirds*,  
408 28(4), 478–486. [https://doi.org/10.1675/1524-4695\(2005\)28\[478:eolcah\]2.0.co;2](https://doi.org/10.1675/1524-4695(2005)28[478:eolcah]2.0.co;2)
- 409 Newbrey, M. G., Bozek, M. A., Jennings, M. J., & Cook, J. E. (2005). Branching complexity and  
410 morphological characteristics of coarse woody structure as lacustrine fish habitat. *Canadian*  
411 *Journal of Fisheries and Aquatic Sciences*, 62(9), 2110–2123. <https://doi.org/10.1139/f05-125>
- 412 Niesar, M., Arlinghaus, R., Rennert, B., & Mehner, T. (2004). Coupling insights from a carp, *Cyprinus*  
413 *carpio*, angler survey with feeding experiments to evaluate composition, quality and  
414 phosphorus input of groundbait in coarse fishing. *Fisheries Management and Ecology*, 11(3-4),  
415 225–235. <https://doi.org/10.1111/j.1365-2400.2004.00400.x>
- 416 Nowakowski, A. J., Frishkoff, L. O., Thompson, M. E., Smith, T. M., & Todd, B. D. (2018). Phylogenetic  
417 homogenization of amphibian assemblages in human-altered habitats across the globe.  
418 *Proceedings of the National Academy of Sciences*, 115(15), E3454–E3462.  
419 <https://doi.org/10.1073/pnas.1714891115>
- 420 O’Toole, A. C., Hanson, K. C., & Cooke, S. J. (2009). The effect of shoreline recreational angling  
421 activities on aquatic and riparian habitat within an urban environment: implications for  
422 conservation and management. *Environmental Management*, 44(2), 324–334.  
423 <https://doi.org/10.1007/s00267-009-9299-3>
- 424 Oertli, B., Joye, D. A., Castella, E., Juge, R., Cambin, D., & Lachavanne, J.-B. (2002). Does size matter?  
425 The relationship between pond area and biodiversity. *Biological Conservation*, 104, 59–70.
- 426 Oksanen, J., Blanchet, F. G., Friendly, M., Kindt, R., Legendre, P., Minchin, P. R., ... Wagner, H. (2013).  
427 *vegan: Community Ecology Package*. Retrieved from <https://cran.r-project.org/package=vegan>
- 428 Osgood, R. A. (2005). Shoreline density. *Lake and Reservoir Management*, 21(1), 125–126.  
429 <https://doi.org/10.1080/07438140509354420>
- 430 Ott, J., Conze, K.-J., Günther, A., Lohr, M., Mauersberger, R., Roland, H.-J., & Suhling, F. (2015). Rote  
431 Liste und Gesamtartenliste der Libellen Deutschlands mit Analyse der Verantwortlichkeit, dritte  
432 Fassung, Stand Anfang 2012 (Odonata). *Libellula Supplement*, 14, 395–422.

- 433 Paracuellos, M. (2006). Relationships of songbird occupation with habitat configuration and bird  
434 abundance in patchy reed beds. *Ardea*, 94(1), 87–98.
- 435 Park, J.-H., Park, H.-W., Sung, H.-C., & Park, S.-R. (2006). Effect of Fishing Activity on Nest Selection  
436 and Density of Waterfowls in Namyang Lake. *Journal of Ecology and Field Biology*, 29(3), 213–  
437 217.
- 438 Paszkowski, C. A., & Tonn, W. M. (2000). Effects of lake size, environment, and fish assemblage on  
439 species richness of aquatic birds. *Internationale Vereinigung Für Theoretische Und Angewandte*  
440 *Limnologie: Verhandlungen*, 27(1), 178–182. <https://doi.org/10.1080/03680770.1998.11901222>
- 441 Pebesma, E. J. (2004). Multivariable geostatistics in S: The gstat package. *Computers and*  
442 *Geosciences*, 30(7), 683–691. <https://doi.org/10.1016/j.cageo.2004.03.012>
- 443 Pimm, S. L., Jenkins, C. N., Abell, R., Brooks, T. M., Gittleman, J. L., Joppa, L. N., ... Sexton, J. O. (2014).  
444 The biodiversity of species and their rates of extinction, distribution, and protection. *Science*,  
445 344(6187), 1246752. <https://doi.org/10.1126/science.1246752>
- 446 Podloucky, R., & Fischer, C. (1994). Rote Listen der gefährdeten Amphibien und Reptilien in  
447 Niedersachsen und Bremen. *Informationsdienst Naturschutz Niedersachsen*, 14(4), 119–120.
- 448 Porej, D., & Hetherington, T. E. (2005). Designing Wetlands for Amphibians: The Importance of  
449 Predatory Fish and Shallow Littoral Zones in Structuring of Amphibian Communities. *Wetlands*  
450 *Ecology and Management*, 13, 445–455. <https://doi.org/10.1007/s11273-004-0522-y>
- 451 R Core Team. (2013). *R: A language and environment for statistical computing*. Vienna, Austria.
- 452 Randler, C. (2006). Disturbances by dog barking increase vigilance in coots *Fulica atra*. *European*  
453 *Journal of Wildlife Research*, 52(4), 265–270. <https://doi.org/10.1007/s10344-006-0049-z>
- 454 Rat der europäischen Gemeinschaft. Richtlinie 92/43/EWG des Rates vom 21. Mai 1992 zur Erhaltung  
455 der natürlichen Lebensräume sowie der wildlebenden Tiere und Pflanzen. , Amtsblatt der  
456 Europäischen Union § (1992).
- 457 Ravn, H. D., Lauridsen, T. L., Jepsen, N., Jeppesen, E., Hansen, P. G., Hansen, J. G., & Berg, S. (2019). A  
458 comparative study of three different methods for assessing fish communities in a small  
459 eutrophic lake. *Ecology of Freshwater Fish*, 28(2), 341–352. <https://doi.org/10.1111/eff.12457>
- 460 Rees, S. E., Rodwell, L. D., Attrill, M. J., Austen, M. C., & Mangi, S. C. (2010). The value of marine  
461 biodiversity to the leisure and recreation industry and its application to marine spatial planning.  
462 *Marine Policy*, 34(5), 868–875. <https://doi.org/10.1016/j.marpol.2010.01.009>

- 463 Reichholf, J. (1970). Der Einfluß von Störung durch Angler auf den Entenbrutbestand auf den  
464 Altwässern am Unteren Inn. *Vogelwelt*, 91, 68–72.
- 465 Reichholf, J. (1988). Auswirkung des Angelns auf die Brutbestände von Wasservögeln im  
466 Feuchtgebiet von internationaler Bedeutung “Unterer Inn.” *Vogelwelt*, 109(Heft 5/6), 206–221.
- 467 Reid, A. J., Carlson, A. K., Creed, I. F., Eliason, E. J., Gell, P. A., Johnson, P. T. J., ... Cooke, S. J. (2019).  
468 Emerging threats and persistent conservation challenges for freshwater biodiversity. *Biological*  
469 *Reviews*, 94(3), 849–873. <https://doi.org/10.1111/brv.12480>
- 470 Remsburg, A. J., & Turner, M. G. (2009). Aquatic and terrestrial drivers of dragonfly (Odonata)  
471 assemblages within and among north-temperate lakes. *Journal of the North American*  
472 *Benthological Society*, 28(1), 44–56. <https://doi.org/10.1899/08-004.1>
- 473 Reynaud, A., & Lanzaova, D. (2017). A Global Meta-Analysis of the Value of Ecosystem Services  
474 Provided by Lakes. *Ecological Economics*, 137, 184–194.  
475 <https://doi.org/10.1016/j.ecolecon.2017.03.001>
- 476 Riedmüller, U., Hoehn, E., & Mischke, U. (2013). *Auswerte-Tool für die Trophie-Klassifikation von*  
477 *Seen. Trophie-Index nach LAWA.*
- 478 Roessink, I., Gylstra, R., Heuts, P. G. M., Specken, B., & Ottburg, F. (2017). Impact of invasive crayfish  
479 on water quality and aquatic macrophytes in the Netherlands. *Aquatic Invasions*, 12(3), 397–  
480 404. <https://doi.org/10.3391/ai.2017.12.3.12>
- 481 Sala, O. E., Chapin III., F. S., Armesto, J. J., Berlow, E., Bloomfield, J., Dirzo, R., ... Wall, D. H. (2000).  
482 Global biodiversity scenarios for the year 2100. *Science*, 287, 1770–1774. Retrieved from  
483 <https://www.ncbi.nlm.nih.gov/pubmed/10710299>
- 484 Santoul, F., Gaujard, A., Angélibert, S., Mastrorillo, S., & Céréghino, R. (2009). Gravel pits support  
485 waterbird diversity in an urban landscape. *Hydrobiologia*, 634(1), 107–114.  
486 <https://doi.org/10.1007/s10750-009-9886-6>
- 487 Saulnier-Talbot, É., & Lavoie, I. (2018). Uncharted waters: the rise of human-made aquatic  
488 environments in the age of the “Anthropocene.” *Anthropocene*, 23, 29–42.  
489 <https://doi.org/10.1016/j.ancene.2018.07.003>
- 490 Schaumburg, J., Schranz, C., Stelzer, D., & Vogel, A. (2014). *Verfahrensanleitung für die ökologische*  
491 *Bewertung von Seen zur Umsetzung der EG-Wasserrahmenrichtlinie: Makrophyten und*  
492 *Phytobenthos* (Version Ok). Retrieved from  
493 [http://www.lfu.bayern.de/wasser/gewaesserqualitaet\\_seen/phylib\\_deutsch/verfahrensanleitu](http://www.lfu.bayern.de/wasser/gewaesserqualitaet_seen/phylib_deutsch/verfahrensanleitu)

- 494 ng/doc/verfahrensanleitung\_seen.pdf
- 495 Scheffer, M., Van Geest, G. J., Zimmer, K., Jeppesen, E., Søndergaard, M., Butler, M. G., ... De  
496 Meester, L. (2006). Small habitat size and isolation can promote species richness: Second-order  
497 effects on biodiversity in shallow lakes and ponds. *Oikos*, *112*(1), 227–231. <https://doi.org/DOI>  
498 [10.1111/j.0030-1299.2006.14145.x](https://doi.org/10.1111/j.0030-1299.2006.14145.x)
- 499 Scheuhammer, A. M., & Norris, S. L. (1996). The ecotoxicology of lead shot and lead fishing weights.  
500 *Ecotoxicology*, *5*, 279–295. <https://doi.org/10.1007/BF00119051>
- 501 Schlüpmann, M. (2005). Bestimmungshilfen: Faden- und Teichmolch-Weibchen, Braunfrösche,  
502 Wasser- oder Grünfrösche, Eidechsen, Schlingnatter und Kreuzotter, Ringelnatter- Unterarten.  
503 *Rundbrief zur Herpetofauna von Nordrhein-Westfalen*, *28*, 1–38. Retrieved from  
504 <http://www.herpetofauna-nrw.de>
- 505 Schurig, H. (1972). Der Baggersee—ein neuer Gewässertyp. *Österreichische Fischerei*, *25*(1), 1–5.
- 506 Seer, F. K., Irmeler, U., & Schrautzer, J. (2015). Effects of trampling on beach plants at the Baltic Sea.  
507 *Folia Geobotanica*, *50*(4), 303–315. <https://doi.org/10.1007/s12224-015-9230-z>
- 508 Shulse, C. D., Semlitsch, R. D., Trauth, K. M., & Williams, A. D. (2010). Influences of Design and  
509 Landscape Placement Parameters on Amphibian Abundance in Constructed Wetlands.  
510 *Wetlands*, *30*, 915–928. <https://doi.org/10.1007/s13157-010-0069-z>
- 511 Šidák, Z. (1967). Rectangular Confidence Regions for the Means of Multivariate Normal Distributions.  
512 *Journal of the American Statistical Association*, *62*(318), 626–633.  
513 <https://doi.org/10.1080/01621459.1967.10482935>
- 514 Somers, C. M., Heisler, L. M., Doucette, J. L., Kjoss, V. A., & Brigham, R. M. (2015). Lake Use by Three  
515 Avian Piscivores and Humans : Implications for Angler Perception and Conservation. *Journal of*  
516 *Open Ornithology*, *8*, 10–21.
- 517 Søndergaard, M., Lauridsen, T. L., Johansson, L. S., & Jeppesen, E. (2018). Gravel pit lakes in Denmark:  
518 Chemical and biological state. *Science of the Total Environment*, *612*, 9–17.  
519 <https://doi.org/10.1016/j.scitotenv.2017.08.163>
- 520 Sørensen, T. A. (1948). A method of establishing groups of equal amplitude in plant sociology based  
521 on similarity of species content and its application to analyses of the vegetation on Danish  
522 commons. *Biol. Skar.*, *5*(4), 1–34.
- 523 Spohn, M., Golte-Bechtle, M., & Spohn, R. (2015). *Was blüht denn da?* (59. Auflage). Stuttgart,  
524 Germany: Kosmos-Verlag.

- 525 Spyra, A., & Strzelec, M. (2019). The implications of the impact of the recreational use of forest  
526 mining ponds on benthic invertebrates with special emphasis on gastropods. *Biologia*.  
527 <https://doi.org/10.2478/s11756-019-00221-2>
- 528 Stefanidis, K., Sarika, M., & Papastegiadou, E. (2019). Exploring environmental predictors of aquatic  
529 macrophytes in water-dependent Natura 2000 sites of high conservation value: Results from a  
530 long-term study of macrophytes in Greek lakes. *Aquatic Conservation: Marine and Freshwater  
531 Ecosystems*, 1–16. <https://doi.org/10.1002/aqc.3036>
- 532 Stock, M., Bergmann, H.-H., Helb, H.-W., Keller, V., Schnidrig-Petrig, R., & Zehnter, H.-C. (1994). Der  
533 Begriff Störung in naturschutzorientierter Forschung: ein Diskussionsbeitrag aus  
534 ornithologischer Sicht. *Zeitschrift Für Ökologie Und Naturschutz*, 3, 49–57.
- 535 Strayer, D. L., & Findlay, S. E. G. (2010). Ecology of freshwater shore zones. *Aquatic Sciences*, 72(2),  
536 127–163. <https://doi.org/10.1007/s00027-010-0128-9>
- 537 Sutter, G. C., & Brigham, R. M. (1998). Avifaunal and habitat changes resulting from conversion of  
538 native prairie to crested wheat grass: patterns at songbird community and species levels.  
539 *Canadian Journal of Zoology*, 76(5), 869–875. <https://doi.org/10.1139/z98-018>
- 540 Tellería, J. L., Santos, T., Sánchez, A., & Galarza, A. (1992). Habitat structure predicts bird diversity  
541 distribution in iberian forests better than climate. *Bird Study*, 39(1), 63–68.  
542 <https://doi.org/10.1080/00063659209477100>
- 543 Triquet, A. M., McPeck, G. A., & McComb, W. C. (1990). Songbird diversity in clearcuts with and  
544 without a riparian buffer strip. *Journal of Soil and Water Conservation*, 45(4), 500–503.  
545 Retrieved from <http://www.jsowconline.org/content/45/4/500.abstract>
- 546 Trochet, A., Le Chevalier, H., Calvez, O., Ribéron, A., Bertrand, R., & Blanchet, S. (2019). Influence of  
547 substrate types and morphological traits on movement behavior in a toad and newt species.  
548 *PeerJ*, 6, e6053. <https://doi.org/10.7717/peerj.6053>
- 549 Trochet, A., Moulherat, S., Calvez, O., Stevens, V., Clobert, J., & Schmeller, D. (2014). A database of  
550 life-history traits of European amphibians. *Biodiversity Data Journal*, 2, e4123.  
551 <https://doi.org/10.3897/BDJ.2.e4123>
- 552 Van de Weyer, K. (2003). Vegetationskundliche Erhebungen in Nassabgrabungen – Ergebnisse von  
553 Tauchuntersuchungen im Niederrheinischen Tiefland. *Tuexenia*, 23, 307–314.
- 554 Van de Weyer, K., Meis, S., & Krautkrämer, V. (2015). Die Makrophyten des Großen Stechlinsees, des  
555 Wummsees und des Wittwesees. *Fachbeitrag Des LUGV*, 145, 1–92.

- 556 Van de Weyer, K., & Schmitt, C. (2011). Bestimmungsschlüssel für die aquatischen Makrophyten  
557 (Gefäßpflanzen, Armleuchteralgen und Moose) in Deutschland: Band 1: Bestimmungsschlüssel.  
558 *Fachbeiträge Des LUGV Brandenburg, 119*, 164pp. <https://doi.org/10.1109/CDC.2012.6427112>
- 559 Van der Maarel, E. (1979). Transformation of cover-abundance values in phytosociology and its  
560 effects on community similarity. *Vegetatio, 39*(2), 97–114. <https://doi.org/10.1007/bf00052021>
- 561 van der Wal, J. E. M., Dorenbosch, M., Immers, A. K., Vidal Forteza, C., Geurts, J. J. M., Peeters, E. T.  
562 H. M., ... Bakker, E. S. (2013). Invasive Crayfish Threaten the Development of Submerged  
563 Macrophytes in Lake Restoration. *PLoS ONE, 8*(10), e78579.  
564 <https://doi.org/10.1371/journal.pone.0078579>
- 565 Venohr, M., Langhans, S. D., Peters, O., Hölker, F., Arlinghaus, R., Mitchell, L., & Wolter, C. (2018).  
566 The underestimated dynamics and impacts of water-based recreational activities on freshwater  
567 ecosystems. *Environmental Reviews, 26*, 199–213. <https://doi.org/10.1139/er-2017-0024>
- 568 Vilizzi, L., Tarkan, A. S., & Copp, G. H. (2015). Experimental Evidence from Causal Criteria Analysis for  
569 the Effects of Common Carp *Cyprinus carpio* on Freshwater Ecosystems: A Global Perspective.  
570 *Reviews in Fisheries Science and Aquaculture, 23*(3), 253–290.  
571 <https://doi.org/10.1080/23308249.2015.1051214>
- 572 Völkl, W. (2010). *Die Bedeutung und Bewertung von Baggerseen für Fische, Vögel, Amphibien und*  
573 *Libellen: Vereinbarkeit der fischereilichen Nutzung mit den Anforderungen des Naturschutzes*  
574 *[Artenvielfalt an und in Baggerseen]*. Bayreuth: Bezirk Oberfranken, Fachberatung für Fischerei.
- 575 Wahl, J., Dröschmeister, R., Gerlach, B., Grüneberg, C., Langgemach, T., Trautmann, S., ...  
576 Avifaunisten, D. (2015). Vögel in Deutschland - 2014. In J. Wahl, R. Dröschmeister, B. Gerlach, C.  
577 Grüneberg, T. Langgemach, S. Trautmann, & C. Sudfeldt (Eds.), *Dachverband Deutscher*  
578 *Avifaunisten e.V.* Retrieved from [http://www.dda-](http://www.dda-web.de/downloads/texts/publications/statusreport2014_ebook.pdf)  
579 [web.de/downloads/texts/publications/statusreport2014\\_ebook.pdf](http://www.dda-web.de/downloads/texts/publications/statusreport2014_ebook.pdf)
- 580 Werneke, U., Kosmac, U., van de Weyer, K., Gertzen, S., & Mutz, T. (2018). Zur naturschutzfachlichen  
581 Bedeutung eines fischfreien Sees. *Natur in NRW, 3*, 27–32. Retrieved from internal-  
582 [pdf://156.38.243.135/WernekeEtAl\\_2018.pdf](pdf://156.38.243.135/WernekeEtAl_2018.pdf)
- 583 Whitaker, D. M. ., & Montevecchi, W. A. . (1999). Breeding Bird Assemblages Inhabiting Riparian  
584 Buffer Strips in Newfoundland , Canada. *The Journal of Wildlife Management, 63*(1), 167–179.  
585 Retrieved from <https://www.jstor.org/stable/3802498>
- 586 Wichmann, G. (2010). Disturbance from angling during the breeding season: its influence on  
587 waterbirds and reedbed birds in the Untere Lobau (Danube Forests National Park). *Egretta, 51*,

- 588 108–113. Retrieved from [http://www.landesmuseum.at/pdf\\_frei\\_baende/31364.pdf#page=110](http://www.landesmuseum.at/pdf_frei_baende/31364.pdf#page=110)
- 589 Winfield, I. J. (2004). Fish in the littoral zone: Ecology, threats and management. *Limnologica*, 34,  
590 124–131. [https://doi.org/10.1016/S0075-9511\(04\)80031-8](https://doi.org/10.1016/S0075-9511(04)80031-8)
- 591 Wolter, C., & Arlinghaus, R. (2003). Navigation impacts on freshwater fish assemblages: The  
592 ecological relevance of swimming performance. *Reviews in Fish Biology and Fisheries*, 13, 63–  
593 89. <https://doi.org/10.1023/A:1026350223459>
- 594 Wood, K. A., Stillman, R. A., Clarke, R. T., Daunt, F., & O'Hare, M. T. (2012). The impact of waterfowl  
595 herbivory on plant standing crop: A meta-analysis. *Hydrobiologia*, 686(1), 157–167.  
596 <https://doi.org/10.1007/s10750-012-1007-2>
- 597 Wright, R. M. (1990). The population biology of pike, *Esox lucius* L., in two gravel pit lakes, with  
598 special reference to early life history. *Journal of Fish Biology*, 36(2), 215–229.  
599 <https://doi.org/10.1111/j.1095-8649.1990.tb05597.x>
- 600 Wright, S. W. (1991). Improved HPLC method for the analysis of chlorophylls and carotenoids from  
601 marine phytoplankton. *Marine Ecology Progress Series*, 77(2–3), 183–196.  
602 <https://doi.org/10.3354/meps077183>
- 603 WWF. (2018). *Living Planet Report - 2018: Aiming Higher* (M. Grooten & R. E. Almond, Eds.).  
604 Retrieved from [https://www.wwf.de/fileadmin/user\\_upload/living-planet-](https://www.wwf.de/fileadmin/user_upload/living-planet-report/2018/WWF_Living_Planet_Report_Englische_Version.pdf)  
605 [report/2018/WWF\\_Living\\_Planet\\_Report\\_Englische\\_Version.pdf](https://www.wwf.de/fileadmin/user_upload/living-planet-report/2018/WWF_Living_Planet_Report_Englische_Version.pdf)
- 606 Yalden, D. W. (1992). The influence of recreational disturbance on common sandpipers *Actitis*  
607 *hypoleucos* breeding by an upland reservoir, in England. *Biological Conservation*, 61, 41–49.
- 608 Yoccoz, N. G., Nichols, J. D., & Boulinier, T. (2001). Monitoring of biological diversity in space and  
609 time. *Trends in Ecology & Evolution*, 16(8), 446–453. [https://doi.org/10.1016/S0169-](https://doi.org/10.1016/S0169-5347(01)02205-4)  
610 [5347\(01\)02205-4](https://doi.org/10.1016/S0169-5347(01)02205-4)
- 611 Zhang, J., Nielsen, S. E., Grainger, T. N., Kohler, M., Chipchar, T., & Farr, D. R. (2014). Sampling plant  
612 diversity and rarity at landscape scales: Importance of sampling time in species detectability.  
613 *PLoS ONE*, 9(4), e95334. <https://doi.org/10.1371/journal.pone.0095334>
- 614 Zhao, T., Grenouillet, G., Pool, T., Tudesque, L., & Cucherousset, J. (2016). Environmental  
615 determinants of fish community structure in gravel pit lakes. *Ecology of Freshwater Fish*, 25(3),  
616 412–421. <https://doi.org/10.1111/eff.12222>
- 617
