# **Status of aquatic and riparian biodiversity in artificial lake ecosystems with and without management for recreational fisheries: Implications for conservation**

Robert Nikolaus<sup>1</sup>, Malwina Schafft<sup>1</sup>, Andreas Maday<sup>1</sup>, Christian Wolter<sup>1</sup> & Robert Arlinghaus<sup>1,2</sup>

<sup>1</sup>Department of Biology and Ecology of Fishes, Leibniz-Institute of Freshwater Ecology and Inland Fisheries, Germany

<sup>2</sup>Division for Integrative Fisheries Management, Albrecht Daniel Thaer-Institute of Agriculture and Horticulture, Faculty of Life Science, Humboldt-Universität zu Berlin, Germany

## Abstract

1 1. There is consensus that humanity is facing a biodiversity crisis, with freshwater-associated  
 2 biodiversity being in particularly dire state. Novel ecosystems created through human use of littoral  
 3 resources, such as gravel pit lakes, can provide substitute habitats for conservation of freshwater  
 4 biodiversity. However, many of these lakes are managed for recreational fisheries and may exhibit  
 5 generally high recreational use intensity, which may negatively impact aquatic biodiversity.  
 6 2. To examine the possible impact of recreational fisheries on a range of aquatic and riparian taxa  
 7 (plants, amphibians, dragonflies, damselflies, waterfowl, songbirds) the biodiversity in gravel pits  
 8 managed (N = 16) and unmanaged (N = 10) by recreational fisheries was compared, while controlling  
 9 for other environmental variables.  
 10 3. The average species richness and conservation value of all taxa examined was similar among both  
 11 lake types, with the exception of amphibians whose conservation value was found to be larger in  
 12 unmanaged lakes. With the exception of submerged macrophytes – a taxon found to be particularly  
 13 species rich and extensively developed in managed lakes - no faunal breaks in any of the taxa were  
 14 revealed when examining the pooled species inventory of managed and unmanaged lakes.  
 15 4. Variation in species richness and conservation value among lakes was strongly driven by available  
 16 vegetated and woody habitat, lake morphology and location in the landscape, and not by the  
 17 presence of recreational fishers or general recreational use intensity. Collectively, there were limited  
 18 evidence found that anglers and recreational fisheries management constitute a relevant stressor to  
 19 aquatic and riparian biodiversity in gravel pits of the study region.

## Keywords

amphibians, birds, disturbance, fishing, littoral, recreation, reservoir, taxon richness, vegetation

# 1. Introduction

Globally, biodiversity is in steep decline, creating a biodiversity crisis of unprecedented scale (IPBES, 2019; WWF, 2018). The numbers of endangered species are constantly rising (Butchart et al., 2010; WWF, 2018), with an estimated 1 million species currently threatened by extinction (IPBES, 2019). The current species extinction rates are about 1000 times higher than the calculated background extinction rate (Pimm et al., 2014). The biodiversity decline is particularly prevalent in freshwaters compared to marine and terrestrial environments (Sala et al., 2000; WWF, 2018). From 1970 to today, freshwater biodiversity has on average declined by 83% in abundance across thousands of populations (WWF, 2018). Although manifold reasons contribute to the freshwater biodiversity crisis (Reid et al., 2019), habitat alteration and fragmentation, pollution, overexploitation, invasive species and climate change constitute key drivers (Dudgeon et al., 2006; IPBES, 2019).

Artificially created aquatic habitats, such as gravel pit lakes or ponds, can play an important role in maintaining and increasing native biodiversity by providing refuges and secondary habitat for rare or endangered species across a range of taxa (Damjanović et al., 2018; Santoul, Gaujard, Angélibert, Mastrorillo, & Céréghino, 2009). Artificial lake ecosystems are often relatively recent in origin (< 100 years of age; Schurig, 1972; Zhao, Grenouillet, Pool, Tudesque, & Cucherousset, 2016) and created by mining of sand, clay, gravel and other littoral resources (Saulnier-Talbot & Lavoie, 2018). More than one billion tons of sand, gravel and other earthen materials were excavated in more than 24,500 quarries and pits within the EU-28 in 2017 alone (UEPG, 2017). The resulting numerous man-made lakes (for simplicity henceforth referred to as gravel pit lakes) have become common elements in many cultural landscapes across the industrialized world (Blanchette & Lund, 2016).

Lakes, including gravel pit lakes, provide a bundle of ecosystem services to humans (Reynaud & Lanzanova, 2017). These include provisioning services, such as fish yield, as well as a range of cultural ecosystem services, in particular recreation (Venohr et al., 2018). Lakes also generate intrinsic benefits associated with the presence of threatened aquatic biodiversity (Reynaud & Lanzanova, 2017). Although the benefits of water-based recreation can be substantial (Venohr et al., 2018), recreation can also negatively impact on the biodiversity of freshwater ecosystems (Liddle & Scorgie, 1980). For example, human activities on the shoreline can alter habitats, which can lead to a loss of plant biodiversity through trampling (O'Toole, Hanson, & Cooke, 2009). Shoreline development, e.g., habitat simplification through the construction of beaches or other recreation sites, can also reduce littoral and riparian habitat quality and negatively affect associated taxa (Spyra & Strzelec, 2019). Water-based recreation has also been found to negatively impact on birds and other wildlife through fear reactions to humans (Dear, Guay, Robinson, & Weston, 2015; Frid & Dill, 2002), dogs (Randler, 2006) or pleasure boating (McFadden, Herrera, & Navedo, 2017; Wolter & Arlinghaus, 2003). Management and conservation of gravel pit lakes and other artificial waterbodies benefits from

54 jointly considering the well-being aquatic recreation produces to humans, while balancing these  
55 benefits with the possible negative impacts that aquatic recreation can induce on aquatic and  
56 riparian biodiversity (Lemmens et al., 2013; Lemmens, Mergeay, Van Wichelen, De Meester, &  
57 Declerck, 2015).

58 Most gravel pit lakes in central Europe are used by recreational fisheries. Anglers are not only users  
59 but in some regions of the world also managers of fish populations and habitats of freshwater  
60 ecosystems (Arlinghaus, Alós, et al., 2017; Daedlow, Beard, & Arlinghaus, 2011). This particularly  
61 applies to Germany, where organizations of anglers, usually angling clubs and associations, are  
62 leaseholders or owners of fishing rights, and in this position are also legally entitled to manage fish  
63 stocks in gravel pit lakes (Arlinghaus, Alós, et al., 2017; Arlinghaus et al., 2015). Angler activities, both  
64 in terms of exploitation and habitat management, are mainly directed at fish stocks, e.g., through  
65 practices such as fish stocking and harvesting. Therefore, key impacts of recreational fisheries can be  
66 expected at the fish stock level (Matern et al., 2019). Angler-induced changes to fish biomass, fish  
67 size or fish community composition can have knock-on effects on submerged macrophytes (e.g., due  
68 to stocking of benthivorous fish, Bajer et al., 2016), amphibians (e.g., due to stocking of large  
69 predators, Hecnar & M'Closkey, 1997; Miró, Sabás, & Ventura, 2018) and invertebrates, such as  
70 dragonflies (Knorp & Dorn, 2016; Miller & Cowl, 2006). In addition, anglers may modify littoral  
71 habitats through angling site constructions (Dustin & Vondracek, 2017), thereby affecting plants  
72 (O'Toole et al., 2009), dragonflies (Z. Müller et al., 2003) or birds (Kaufmann, Hughes, Whittier, Bryce,  
73 & Paulsen, 2014). Certain angler types also contribute to eutrophication through ground-baiting  
74 (Niesar, Arlinghaus, Rennert, & Mehner, 2004), thereby possibly affecting aquatic macrophytes  
75 (Stefanidis, Sarika, & Papastegiadou, 2019), and they may disturb wildlife and birds due to extended  
76 human presence in littoral zones (Knight, Anderson, & Marr, 1991; Wichmann, 2010). Lost fishing  
77 gear can also have lethal effects on birds (Franson et al., 2003; Heath, Dahlgren, Simon, & Brooks,  
78 2017), for example when lost leads are ingested (Franson et al., 2003; Scheuhammer & Norris, 1996).  
79 Therefore, anglers can both be seen as stewards of aquatic ecosystems as well as a potential threat  
80 to certain aquatic taxa depending on the local angling intensity and other conditions.

81 In Germany, recreational fisheries are regularly constrained or even banned from a use of  
82 waterbodies, including gravel pits (Landkreis Lüneburg, 2018; H. Müller, 2012), while other  
83 recreational uses were not constrained. This is commonly justified by angling particularly disturbs  
84 taxa and habitats of conservation concern (Erlinger, 1981; Reichholf, 1988). There is evidence that  
85 the recreational fisheries use of newly created gravel pit lakes was already banned during the  
86 process of licensing the sand or gravel extraction, i.e. well before the gravel pit lake even started  
87 being excavated (H. Müller, 2012). To empirically examine the ecological justification of such actions,  
88 a space-for-time substitution design was used, studying the biodiversity in gravel pits that are used

89 and managed by recreational fisheries compared with the biodiversity in similar gravel pits that are  
 90 not used and managed by recreational fisheries. This study was not meant to reveal the specific  
 91 pathways by which anglers may impact on different taxa, rather to examine the aggregate impact of  
 92 recreational fisheries on biodiversity in gravel pit lakes. Specifically, there was a major interest in  
 93 estimating the additive effect of the presence of recreational fisheries on the species richness, faunal  
 94 composition and conservation value across a range of aquatic and riparian taxa commonly debated in  
 95 conservation conflicts. It was hypothesized that recreational fisheries will not affect the species  
 96 richness and conservation value of all taxa that are not directly targeted by anglers (Odonata,  
 97 amphibians, submerged and riparian vegetation, waterfowl and songbirds). This was used as null  
 98 hypothesis when testing for statistical differences between managed and not managed gravel pit  
 99 lakes. It was further hypothesized that some disturbance-sensitive taxa of songbirds, waterfowl or  
 100 dragonflies may be absent in intensively used lakes, thereby affecting the species richness and  
 101 conservation value of these taxa in lakes with substantial recreational use.

## 2. Methods

### *Study area and lake selection*

This study was conducted in Lower Saxony, in the German lowlands (Figure 1). Lower Saxony is populated by 8 million people corresponding to a population density of 167 inhabitants per km<sup>2</sup>. The total area of the state is 47,710 km<sup>2</sup>, of which more than 50% constitute of agricultural land, in total 27,753 km<sup>2</sup>, and 10,245 km<sup>2</sup> of managed forests (Landesamt für Statistik Niedersachsen (LSN), 2018). Natural lentic water bodies are scarce. Out of a total of 35,048 ha of standing water surface in Lower Saxony, artificial lakes (mainly ponds and gravel pit lakes) form 73% by surface and more than 99% of the number of lentic waterbodies in the region (Manfrin et al., unpublished data).

In Germany, fishing rights are tight to the owner of the water body. If not already owned they are typically leased by local angling clubs. However, there are still gravel pits where the fishing right is neither used nor leased by the owner. To compare the biodiversity present in angler-managed and unmanaged lakes, first a sample of intensively managed gravel pits was selected in Lower Saxony that fulfilled the following criteria: (1) fishing rights and associated management duties must be in the hand of local angling clubs for a period of at least ten years, (2) angling clubs must be willing to accept intensive biological sampling over the course of many years and (3) all angling clubs must be united in the same umbrella association to facilitate planning and communication. It was partnered with the Angler Association of Lower Saxony (AVN) and all the associated angling clubs were used as a sample frame to identify managed lakes. The final set of lakes was identified through a key informant (a fisheries biologist) of the AVN who helped identifying cooperating angling clubs. To that end, all angling clubs of the AVN membership were asked for their interest in contributing lakes to a multi-year study on the ecology of gravel pit lakes. From the set of angling clubs principally interested in the study and thereby willing to allow the research team to grant repeated access to assess biodiversity, a random sample was drawn and a structured questionnaire sent to identify which type of lakes and rivers were under the management regime. The final club and lake selection was constrained to a set of clubs having at least one gravel pit as private property because particularly intensive recreational use and management was expected in these systems. Through this approach N = 16 managed lakes were selected as study sites (Table 1, Figure 1). Then local informants of residents and anglers of each of the 16 lakes were used to identify gravel pits not managed by anglers in direct or close vicinity to the managed lakes, thereby creating a paired design. After having identified too few lakes by this, governmental offices were asked for helping in identifying unmanaged gravel pit lakes comparable to the already chosen managed lakes. As the number of unmanaged lakes is substantially smaller than the number of managed lakes in Lower Saxony and due to logistical constraints in effectively sampling a large number of lakes during the

same time period over multiple year, N = 10 unmanaged lakes were identified and included in the study (Table 1, Figure 1). The lakes were chosen as to most closely as possible match each other's environmental conditions, both in terms of location in the landscape, age, productivity and vegetation. The lakes were confined to being small and ranging from 1 ha to 20 ha of surface area, they had no recent dredging in the last ten years happening and the lakes were scattered across Lower Saxony to cover all conditions (Figure 1). In a subset of these lakes, Matern et al. (2019) revealed identical fish biomasses and abundances in both lakes types, but a substantially larger local fish species richness and a significantly larger presence of game fishes (particularly piscivorous fish and large-bodied cyprinids such as carp, *Cyprinus carpio*) in angler-managed lakes. These data already suggested that angler-managed lakes were indeed more intensively managed in terms of fish biodiversity metrics. This was a major precondition of the study design to isolate the impact of recreational fisheries on biodiversity while controlling for possible confounding environmental variables.

#### *Land use*

Several indicators of land use and spatial arrangement were assessed for each lake to control for these variables when comparing managed and unmanaged lakes and their biodiversity inventory. To that end, distances of each lake to nearby cities, villages, lakes, canals and rivers were calculated in google maps (© 2017), and the shares of different land use categories within a distance of 100 m around each lake shoreline (buffer zone) were calculated in QGIS 3.4.1 with GRASS 7.4.2 using ATKIS® land use data with a 10 x 10 meter grid scale (© GeoBasis-DE/BKG 2013; AdV, 2006). The categories of the ATKIS®-objects were pooled to classes of (1) urban land use (all anthropogenic infrastructures like buildings, streets, railroad tracks etc.), (2) agricultural land use (all arable land like fields and orchards but not meadows or pastures), (3) forest, (4) wetland (e.g., swamp lands, fen, peat lands), (5) excavation (e.g., open pit mine), (6) water surface (e.g., lakes, rivers, canals) and (7) other land use (not fitting in previous classes like succession areas, grass land, boulder sites etc.). With this classification it was tried to account for the general land use effects on the studied aquatic and riparian taxa.

#### *Recreational use intensity*

Several indicators of recreational use intensity were assessed, enumerating the type and number of recreationists during each site visit (between six and nine visits per lake, see below) as well as using indirect measures of use intensity. The indirect measures encompassed measures of accessibility and litter as follows: every lake was walked around with a measuring wheel (NESTLE-Cross-country measuring wheel – Model No. 12015001, with 2 m circumference and 0.1% accuracy), measuring the distances of all trails and paths at the lake. This was summed and then normalized to shoreline

length. Angling sites and open spaces along the shoreline were counted, and all litter encountered was assigned to one of two categories, (1) angling related (e.g., lead weight, nylon line, artificial bait) or (2) not angling related (e.g., plastic packaging, beer bottles, cigarettes), and counted. It was assumed that more intensively used lakes also receive larger amount of litter and are easily accessible through paths and trampled sites (O'Toole et al. 2009).

#### *Morphology*

Every lake was mapped with a SIMRAD NSS7 evo2 echo sounder paired with a Lawrence TotalScan transducer. The equipment was mounted on a boat driving at 3 – 4 km/h along the lake on transects 25 – 45 m apart from each other depending on lake size and lake depth. The echo sounding data was stored in the Lawrence format .slg2 and processed by BioBase (Navico). The post-processed raw data (depth and gps-position per ping) were used to calculate depth contour maps using ordinary kriging with the gstat-package in R (Gräler, Pebesma, & Heuvelink, 2016). The contour maps were used to extract maximum depth and to calculate the relative depth ratio (Damjanović et al., 2018). Shoreline length and lake area were estimated in QGIS 3.4.1, and used to calculate the shoreline development factor (Osgood, 2005).

#### *Water chemistry and nutrient levels*

In spring during overturn (complete mixing of holomictic lakes), epilimnic water samples were taken for analyzing total phosphorus concentrations (TP), total organic carbon (TOC), ammonium and nitrate concentrations ( $\text{NH}_4$ ,  $\text{NO}_3$ ) and chlorophyll a (Chl-a) as a measure of algal biomass. The TP was determined using the ammonium molybdate spectrometric method (EN ISO 6878, 2004; Murphy & Riley, 1962), TOC was determined with a nondispersive infrared detector (NDIR) after combustion (DIN EN 1484, 1997), ammonium and nitrate were assessed using the spectrometric continuous flow analysis (DIN EN ISO 13395, 1996; EN ISO 11732, 2005), and Chl-a was enumerated using high performance liquid chromatography (HPLC) (Mantoura & Llewellyn, 1983; Wright, 1991). The lake's conductivity and pH were measured with a WTW Multi 350i sensor probe (WTW GmbH, Weilheim, Germany). Additionally, water turbidity was assessed using a standard Secchi-disk.

#### *Littoral and riparian habitat assessment*

As measures of littoral and riparian habitat quality, the riparian vegetation and dead wood was assessed using a plot design evenly spaced throughout the shoreline following Kaufmann & Whittier (1997). Transects were placed perpendicular to and along the shore line with a 15 x 15 meter riparian plot at the shore (Figure 2). The positions of the plots were randomly distributed along the shoreline, but had at least 50 meter distance to each other. Each littoral transect was 4 meter wide and at maximum 10 meter long or shorter if the maximum sampling depth of 3 meter was reached. In each



transect all dead wood structure was counted and assigned to one of two categories: (1) simple dead wood (bulk diameter < 5 cm and length < 50 cm, no and very low complexity), or (2) coarse woody structure (bulk diameter > 5 cm and/or length > 50, any degree of complexity) following the criteria of DeBoom & Wahl (2013), Newbrey et al. (2005) and Mallory et al. (2000). Also, the length and bulk diameters were measured for all dead wood structures; additionally width and height was measured for coarse woody structure. From these measurements, the volume for each dead wood structure was calculated using the formula for a cylinder as reference for simple dead wood and the formula for an ellipsoid as reference for coarse woody structure. Riparian habitats (e.g., trees, tall herbs, reed) were evaluated in the plots at the shore following the protocol of Kaufmann & Whittier (1997) where “0” means absent, “1” means sparse (<10% coverage), “2” means moderate (10-39% coverage), “3” means dominant (40-75% coverage), and “4” means very dominant (>75% coverage) in the plot.

#### *Submerged macrophytes*

All lakes were sampled for the extension of submerged macrophytes and macrophyte diversity between late June and late August, following the sampling protocol of Schaumburg et al. (2014). Every lake was scuba dived and snorkeled along transects extending from the shoreline (depth = 0m) towards the lake center perpendicular to the shoreline until the deepest point of macrophyte growth was reached. The position of the first sampled transect was randomly chosen and all other transects were then spaced evenly along the shoreline at distances of 80 m – 150 m depending on lake size. This summed up to totals between four and 20 transects per lake. Along each transect, in every depth stratum (0-1 m, 1-2 m, 2-4 m, 4-6 m) the dominance of each macrophyte species was estimated according to the ordinal Kohler scale: “0 – absent”, “1 – very rare”, “2 – rare”, “3 – widespread”, “4 – common”, “5 – very common” (Kohler, 1978; Van de Weyer, 2003). No macrophytes were found in areas deeper than 6 m. The species were identified under water or, if not possible, samples were taken into laboratory and identified under binoculars following Van de Weyer & Schmitt (2011). Macrophyte dominance of each species was transformed into percent coverage for each transect (Van der Maarel, 1979). The average coverage per stratum was extrapolated to its respective total lake area from contour maps. Afterwards, the total macrophyte coverage in the littoral zone was calculated using the extrapolated coverage from strata between 0 m and 3 m depth. The regional species pool was estimated from the Red Lists of Lower Saxony in combination with the expected species for gravel pit lakes following the list of plant species associations in Lower Saxony (Garve, 2004; Korsch, Doege, Raabe, & van de Weyer, 2013; Preising et al., 1990).

## 234 *Amphibians*

235 Amphibians were sampled during the mating-seasons (from March to May). Every lake was sampled  
 236 twice: (1) during the day with an inflatable boat driving slowly along the shore searching for adults,  
 237 egg-balls (frogs) and egg-lines (toads), (2) after sunset by feet around the lake searching for calling  
 238 adults. Each observation (adult or eggs) was marked with a GPS (Garmin Oregon 600), identified in  
 239 the field or photographed for later identification following Schlüpmann (2005), and numbers were  
 240 recorded (adults) or estimated (eggs), assuming 700 to 1500 eggs per egg-ball (frogs) or 10,000 eggs  
 241 per (100% covered) m<sup>2</sup> of egg-line-assemblages (toads). The regional species pool was estimated  
 242 from the Red List of Lower Saxony in combination with their expected distribution (BfN, 2012;  
 243 Kühnel, Geiger, Laufer, Podlucky, & Schlüpmann, 2009).

## 244 *Odonata*

245 Dragonflies and damselflies were sampled once per lake between early- and mid-summer. At each  
 246 lake the whole shoreline was intensively searched during the mid-day. Sitting or flushing imagines  
 247 were caught with a hand net (butterfly net, 0.2 mm mesh size, bioform), identified using Lehmann &  
 248 Nüss (2015), and released without being harmed. The regional species pool was estimated from the  
 249 Red List of Lower Saxony in combination with their expected habitat preferences (Altmüller &  
 250 Clausnitzer, 2010; Hein, 2018).

## 251 *Waterfowl and songbirds*

252 Waterfowl were identified following Dierschke (2016), counted and protocolled at every visit of each  
 253 lake (between six and nine visits per lake). Songbirds were sampled once per lake between early- and  
 254 mid-summer using 2-minutes audio-recordings (ZOOM Handy Recorder H2, Surround 4-Channel  
 255 setting, 44.1kHz sampling frequency, 16 bit quantification) at sampling points distributed along the  
 256 shoreline, placed 200 m apart around the whole shoreline, assuming each sampling point covers a  
 257 radius of 100 m. Sampling points were marked with GPS. The audio-records were later analyzed in  
 258 the lab, and singing species were identified using reference audio samples from two websites  
 259 ([www.deutsche-vogelstimmen.de](http://www.deutsche-vogelstimmen.de); [www.vogelstimmen-wehr.de](http://www.vogelstimmen-wehr.de)) and a smart phone application  
 260 (BirdUp - Automatic Birdsong Recognition, developed by Jonathan Burn, Version 2018). The regional  
 261 species pools for waterfowl and songbirds were estimated from the Red List of Lower Saxony,  
 262 excluding birds with not matching habitat preferences (i.e., waders; Dierschke, 2016; Krüger &  
 263 Nipkow, 2015).

## 264 *Riparian vegetation*

265 All lakes were sampled for riparian vegetation in May. At each lake, four transects were sampled, one  
 266 at each cardinal direction of the lake. Each transect was 100 m long and contained five evenly spaced  
 267 (20 m distance) 1 m<sup>2</sup>-plots. Trees (>3 m high) were identified (using Spohn, Golte-Bechtle, & Spohn,  
 268 2015) and counted along each transect. If species were not obvious, an application for smart phones  
 269 called Pl@ntNet was used (Goëau et al., 2014). Herbs were identified following the same keys  
 270 (Goëau et al., 2014; Spohn et al., 2015) as far as possible in each plot. Abundance classes (“r” = 1  
 271 individual in plot, “+” = 2 – 5 individuals in plot but < 5 % coverage, “1” = 6 – 50 individuals in plot but  
 272 < 5 % coverage, “2m” = > 50 individuals in plot but < 5 % coverage, “2a” = 5 – 15 % coverage, “2b” =  
 273 16 – 25 % coverage, “3” = 26 – 50 % coverage, “4” = 51 – 75 % coverage, “5” = 76 – 100 % coverage;  
 274 Braun-Blanquet, 1964) were estimated for each species, genus or family (depending on identification  
 275 accuracy, Table S9). The regional species pool was estimated from the Red Lists of Lower Saxony  
 276 excluding plants with not matching ecoregions (Garve, 2004; Spohn et al., 2015).

## 277 *Diversity metrics*

278 Presence-absence data and estimated species richness by taxon was used in this study. Additionally,  
 279 a taxon-specific conservation value was calculated following Oertli et al. (2002). To that end, each  
 280 identified species was assigned a threat status according to its most threatened status on any of the  
 281 following four lists: regional Red Lists of Lower Saxony (Altmüller & Clausnitzer, 2010; Garve, 2004;  
 282 Korsch et al., 2013; Krüger & Nipkow, 2015; Podlousky & Fischer, 1994), national Red Lists of  
 283 Germany (Grünberg et al., 2015; Korsch et al., 2013; Kühnel et al., 2009; Ludwig & Schnittler, 1996;  
 284 Ott et al., 2015), the international Red List (IUCN, 2018) and the annex lists of the European Union  
 285 (EU) Habitats Directive and the EU Birds Directive (EU, 1992; EU, 2009). For each species, the highest  
 286 threat status mentioned on any of these four lists was used. The conservation value  $c$  for a species of  
 287 the least threatened rank (not listed, very common, not threatened) was  $c_0 = 2^0 = 1$ , and every  
 288 ascending threat status was given an exponentially larger conservation value (i.e., weight)  $c_r = 2^r$  as  
 289 shown in Table 2. The final taxon-specific conservation value ( $CV$ ) for each lake was calculated by  
 290 taxon as the sum of all values ( $c$ ) for every observed species ( $s_1, s_2, s_3, \dots, s_n$ ) divided by the total  
 291 number of observed species ( $n$ ):

$$CV = \frac{1}{n} * \sum_{s_i=1}^{s_n} c_{s_i}$$

## 292 *Statistical analysis*

293 Mean/median differences among lake types (managed or unmanaged gravel pits) were calculated for  
 294 all individual environmental variables and taxon-specific biodiversity variables (species richness and

conservation value) with Student's t-tests (variance homogeneity) or Welch-F-test (variance heterogeneity) when the error term was normally distributed (Shapiro-Wilk-test), otherwise a Mann-Whitney-U-test assessing median differences was used. These tests were carried out in R (stats-package, R Core Team, 2013) and p-values were afterwards Sidak-corrected (Šidák, 1967) to control for multiple comparisons. To estimate faunal breaks and species turn over rates, the pooled species inventory by lake type (managed and unmanaged) was used and two indices were calculated: (1) the Sørensen index (Sørensen, 1948) as a measure of community similarity and (2) the richness-based species exchange ratio  $SE_{r_i}$  (Hillebrand et al., 2018) as a measure of species turnover. The Sørensen index ranges from 0 (no species in common) to 1 (all species the same) and is calculated as  $\frac{2a}{2a+b+c}$ , with  $a$  being the number of shared species and  $b$  and  $c$  being the numbers of unique species to the two lake types. The  $SE_{r_i}$  also ranges from 0 (all species the same) to 1 (no species in common) and is calculated as  $\frac{b+c}{a+b+c}$ . Following Matthews (1986), faunal breaks among lake types were assumed to occur when the Sørensen index was  $< 0.5$ , and the species exchange among lake types was considered to be substantial when the  $SE_{r_i}$  index was  $> 0.5$ .

As different environmental variables and the diversity metrics of the different taxa could co-vary, further multivariate tests of differences among lake types in terms of the environment as well as taxon-specific biodiversity were conducted using Redundancy Analysis (RDA; Legendre & Legendre, 2012), carried out after first conducting standard Principal Component Analyses (PCA) without rotations as a dimension reduction tool (PCA; Mardia, Kent, & Bibby, 1979). Environmental variables forming PCA were considered correlated, the loadings identified and interpreted as class of environmental variables (e.g., morphology, productivity, land use) and PC axes scores were used in further analyses. The environmental predictors of species richness and conservation value across different taxa were subsequently evaluated with a forward selection process (Blanchet, Legendre, & Borcard, 2008) in a RDA using PC scores after removing highly correlated variables using the variance inflation factor (VIF; Neter, Kutner, Nachtsheim, & Wasserman, 1996). The models were first run with only the environmental predictors and without the factor "management". These models were compared to models including "management" as additional predictor variable. Data for PCA and RDA was scaled and centered (z-transformation), and the amount of variance explained by variables in the best models was expressed using the adjusted coefficient of multiple determination ( $R^2_a$ ; Ezekiel, 1930).

Significance was assessed using a 5 % rejection level ( $p < 0.05$ ). Because the sample size of lakes was moderate, p-values of  $0.05 \leq p < 0.10$  were also interpreted as a trend.

### 3. Results

#### *Environmental variables of managed and unmanaged gravel pit lakes*

The studied lakes were overwhelmingly small (mean  $\pm$  SD, area  $6.7 \pm 5.1$  ha, range 0.9 – 19.6 ha), shallow (maximum depth  $9.7 \pm 5.1$  m, range 1.6 – 24.1 m) and mesotrophic (TP  $26.3 \pm 30.4$   $\mu\text{g/l}$ , range 8 - 160  $\mu\text{g/l}$ ) with moderate visibility (Secchi depth  $2.4 \pm 1.4$  m, range 0.5 – 5.5 m). The land use in a 100 m buffer around the lake was characterized by low degree of forestation (mean percentage of forests in buffer zone of  $16 \pm 21$  %, range 0 – 68 %) and high degree of agricultural land use (mean percentage of agricultural land use in buffer zone of  $27 \pm 22$  %, range 2.4 – 79 %). Lakes were closely situated to human settlements (mean distance to the next village  $618.3 \pm 523.1$  m, range 20 – 1810 m) and were on average a few m away from other water bodies (mean distance to next lake, river, or canal  $55.8 \pm 84.7$  m, range 1 – 305 m). Most of the lakes were regularly used by recreational angling (legal only in managed lakes) and other recreational activities and were generally accessible through paths, parking lots and trails. An overview of all environmental variables and their values across lakes is provided in the supplementary Tables S1-S4.

The multivariate RDA revealed the lack of significant differences among managed and unmanaged lakes in all variables representing morphology ( $R^2_{\text{adj.}} = -0.005$ ,  $F = 0.86$ ,  $p = 0.470$ , Figure 3a), trophic state ( $R^2_{\text{adj.}} = -0.006$ ,  $F = 0.86$ ,  $p = 0.544$ ), proximity to alternative water bodies ( $R^2_{\text{adj.}} = -0.023$ ,  $F = 0.45$ ,  $p = 0.867$ ), proximity to human presence ( $R^2_{\text{adj.}} = 0.035$ ,  $F = 1.90$ ,  $p = 0.143$ ) and land use variables ( $R^2_{\text{adj.}} = 0.033$ ,  $F = 1.85$ ,  $p = 0.135$ , Figure 3b, see the full PCA results behind the dimension reduction of the environmental variables in Tables S7, S8). It also revealed that the habitat structure differed significantly among managed and unmanaged lakes along the first principal component axis (Dim 1) representing a vegetation gradient (Table S7), with managed lakes being more vegetated in both the riparian and the littoral zone than unmanaged ones (Figure 3c,  $R^2_{\text{adj.}} = 0.056$ ,  $F = 2.48$ ,  $p = 0.022$ ). The strongest separation of both lakes types, however, was revealed in relation to the first PC axis representing the intensity of recreational use by both angling and non-angling recreational activities and general accessibility through trails around the lake; here, managed lakes exhibited a substantially greater recreational use intensity and greater accessibility to humans than unmanaged lakes (Figure 3d,  $R^2_{\text{adj.}} = 0.16$ ,  $F = 5.76$ ,  $p < 0.001$ ). Note that there was less differentiation among lake types along the second PC axis of the recreational variables, which represented an index of accessibility difficulty (Table S8, Figure 3d). Note also that the PC of recreational variables did not cleanly separate lakes with high angler use from lakes with high use of other recreationists: lakes with plenty of anglers were also regularly used by plenty other recreationists (Table S8). Finally, although unmanaged lakes were not managed by recreational fisheries, a small degree of illegal

fishing was also detected at some unmanaged lakes (Table S4, for full set of univariate results see supplementary Table S5, S6).

# *Species diversity and taxon-specific conservation value in managed and unmanaged gravel pit lakes*

In total 60 species of submerged macrophytes, 191 species of herbs, 44 species of trees, 3 species of amphibians, 33 species of Odonata, 36 species of songbirds and 34 species of waterfowl were detected across the pool of lakes (Supplement, Table S9). This species inventory represented a substantial fraction of the regional species pool of trees (59%), Odonata (56%), submerged macrophytes (48%) and waterfowl (45%). By contrast, only one third or less of the regional species pool of herbal species (12%), songbirds (33%) and amphibians (38%) was detected.

Variation in local species richness and presence of endangered taxa among lakes was large, yet the frequency of threatened species showed rather similar patterns in managed or unmanaged lakes (Supplement, Figures S1, S2). Most managed and unmanaged lakes hosted at least a few threatened species (Figures S1, S2). Unique species were found in all taxa (except for amphibians) in each of the two lake types (Table 3). Managed lakes hosted more unique species within most taxa than unmanaged lakes, while unmanaged lakes had more unique Odonata. Overwhelmingly, common species were detected, particularly among amphibians (Table S9). Only few species non-native to Lower Saxony or Germany were found (Table S9), all together 4 submerged macrophyte species (e.g., *Elodea nuttallii* [Planch.] H. St. John, which is invasive), 3 riparian tree species, 2 waterfowl species (e.g., *Alopochen aegyptiaca* L., which is invasive) and 1 dragonfly species.

The average taxon-specific species richness (alpha-diversity) was statistically similar in managed and unmanaged lakes across all taxa (Table 4). Similarly, the taxon-specific conservation value of each taxon was, on average, similar among managed and unmanaged lakes with one exception: unmanaged lakes hosted amphibian species of higher average conservation value. However, the overall species richness was particularly low for this taxon compared to the other taxa (Table 4).

When examining the pooled species inventories, no evidence for faunal breaks among managed and unmanaged lakes were identified using the Sørensen index (all indices  $\geq 0.5$ ; Table 3) except for submerged macrophytes that were particularly species rich in managed lakes (Table 4). Similarly, there was no evidence for substantial species turnover (SER<sub>r</sub>), with the exception of submerged macrophytes, where almost 70% of the species pool was different between the two management types (Table 3).

# *Environmental correlates of species richness and conservation value in gravel pit lakes and the role of management*

There was no joint variation in species richness and conservation value across all taxa and lakes indicating taxon-specific responses to lake conditions (Figures 4, 5, a complete visualization is plotted in supplementary Figures S3, S4). In relation to species richness across taxa, the first PCA axis represented covariance of amphibian, songbirds and riparian herb species diversity, collectively representing riparian diversity (Table S11). It was along this axis, where managed and unmanaged lakes varied close to significance, if the model included only the factor management. The unmanaged lakes showed a non-significant trend (RDA,  $R^2_{adj.} = 0.043$ ,  $F = 2.12$ ,  $p = 0.051$ ) for hosting larger riparian diversity (Figure 4). The second PCA axis represented high species richness of aquatic diversity in relation to submerged macrophytes and Odonata, and no differentiation among managed and unmanaged lakes (Figure 4). The third PC axis was related to the diversity of riparian tree species and the fourth mainly to waterfowl diversity, and again no relevant separation among lake types was revealed (Figure S3, Table S11).

High conservation value of macrophytes and waterfowl correlated with lakes offering a low conservation value for amphibians (first PC axis, Figure 5, Table S12). Along this first PC axis managed and unmanaged lakes differentiated the most: in a model with only management as environmental variable, managed lakes revealed a significantly higher conservation value of waterfowl, Odonata and submerged macrophytes and a lower conservation value of amphibians (Figure 5,  $R^2_{adj.} = 0.068$ ,  $F = 2.83$ ,  $p = 0.008$ ). The second PC axis was mainly represented by a high conservation value of songbirds and to a lesser degree waterfowl, and the third axis represented the conservation value of riparian plants, but lakes did not differentiate along the second and third axes (Figure 5, Table S12, Figure S4).

All environmental indicators subsumed by PC-scores into predictors of environmental classes (Tables S7, S8) had acceptable inflation factors (Table S10) and were thus used for RDA analysis of species richness and conservation value across the different taxa. The RDA-based forward model selection retained several environmental class variables as correlates of species richness across taxa (Table STable 6). Woody habitat was negatively correlated with the riparian species richness and positively with tree diversity (along the first axis, Figure 4, Table S11), and vegetated habitat was positively correlated with species richness of submerged macrophytes and Odonata (second axis, Figure 4, Table S11). The lake steepness (which correlated with smaller lake sizes and low shoreline development factor; Table S7) was negatively correlated with waterfowl species richness (Figure 4, Table S11). Agricultural extension (Table S8) was positively associated with species richness of submerged macrophytes and Odonata (second axis, Figure 4, Table S11). The recreational use intensity did not correlate with species diversity (Table STable 6). After accounting for these

environmental variables, management was no longer close to significant in explaining species diversity across taxa and dropped out of the best-fitting RDA (Table 6). The best model explained more than 42 % of the total variance in the multivariate species richness, which is a lot more than management alone (about 8 % explained variance).

In terms of variation in conservation value across all taxa, the best model explained only 15.6 % of total variance (management alone explained 10.5 %), and the RDA analysis indicated that the general recreational use intensity of a lake positively correlated with the first PC axis: lakes with greater recreational use intensity also hosted a larger conservation value of aquatic taxa (submerged macrophytes, Odonata and waterfowl) and lower conservation value of amphibians (Figure 5, Table S12). The extension of woody habitat negatively correlated with the conservation value of songbirds, which mainly represented the second axis (Table S12). Managed and unmanaged lakes strongly differed in the recreational use intensity, but in contrast to expectations this environmental factor was positively associated with the conservation value of all taxa except amphibians (Figure 5, Table S12). When entering management as an additional explanatory factor in the RDA, it was retained as the only variable for explaining conservation value, and all other environmental predictors dropped out (Table 6). This is most likely because management correlates significantly and strongly with the recreational use intensity (RDA:  $R^2_{adj.} = 0.16$ ,  $F = 5.76$ ,  $p < 0.001$ ; Figure 3d, Table S8) and as a categorical variable the factor management absorbs more of the variance than the quantitative recreational use intensity index.



## 4. Discussion

### *Biodiversity potential of gravel pits*

This comparative study revealed that gravel pit lakes managed and used by anglers as well as unmanaged lakes constitute a highly suitable environment hosting a substantial species diversity and fraction of the regional species' pools of several aquatic and riparian taxa, in particular submerged macrophytes, tree species, Odonata and waterfowl. This finding supports related work revealing gravel pits as suitable habitats for multiple plant, vertebrate and invertebrate taxa, some of which have a very high conservation value (Damjanović et al., 2018; Völkl, 2010). Yet, only small fractions of the regional species' pools for herbal species, amphibians and songbirds were found. Gravel pits are relatively steeply-sloped with small fractions of littoral areas, disconnected from rivers, placed in agricultural landscapes and close to anthropogenic infrastructure (Blanchette & Lund, 2016). Also, they have unique colonization and succession histories (Köppel, 1995). Because gravel pit lakes are limited in certain habitat features and due to their special origin, they are suitable only for a fraction of a regional species pool that typically inhabits lakes and lake shores.

### *Differences in the environment among managed and unmanaged lakes*

Our studied lakes were similar in the majority of the environmental factors examined except the recreational use intensity and the extension of vegetation, particularly of submerged macrophytes. The latter were, surprisingly perhaps, more prevalent in managed gravel pit lakes. Managed lakes were found to have more developed tracks, parking places and other facilities that attract anglers. However, these features also appeared to attract other recreational users as seen in the first PC axes ("recreational use intensity", Figure 3d). Thus, angler-managed lakes were more accessible to recreationists in general, and while the angler presence was - as expected by design - more pronounced in managed lakes, also other recreational activities were more frequently observed at managed lakes. Unmanaged lakes were also visited by non-angling recreationists (e.g., walkers), yet at a lower intensity. Importantly, in contrast to the expectations of this study, the combined index of recreational use intensity correlated positively with the conservation value of aquatic taxa (submerged macrophytes, Odonata and waterfowl) and there was no relation of recreational use intensity and species richness. Thus, although it could not isolate the impact of recreational fisheries use from other recreational uses, this study does not support negative effects of aquatic recreation on the metrics that were assessed.

In light of previous work, lakes managed by anglers were expected to be heavily modified along the shoreline to accommodate angling sites and access to anglers (Dustin & Vondracek, 2017; O'Toole et

al., 2009). Although indeed higher accessibility in angler-managed lakes was recorded (in particular the extension of trails), at the lake-level the degree of aquatic and riparian vegetation was found to be significantly larger in angler-managed systems compared to unmanaged lakes. These data show that good accessibility does not equal diminished riparian or littoral habitat quality. In fact, anglers have an interest to maintain access to lakes to be able to fish, but there is also an interest in developing habitat suitable for their targets, which can then indirectly support other biodiversity as well. The littoral zone belongs to the most productive habitats of lakes (Winfield, 2004), and many angler-targeted fish depend on underwater and riparian vegetation for spawning and refuge (Lewin, Mehner, Ritterbusch, & Brämick, 2014; Lewin, Okun, & Mehner, 2004). In addition, crowding is a severe constraint that reduces angler satisfaction (Beardmore, Hunt, Haider, Dorow, & Arlinghaus, 2015). Therefore, although anglers regularly engage in shoreline development activities and angling site maintenance, the data of this study suggest they do so to a degree that maintains or even improves aquatic and riparian vegetation.

#### *Differences in biodiversity among managed and unmanaged lakes*

The only taxon where faunal breaks and a substantial turnover was observed among managed and unmanaged lakes were submerged macrophytes, but surprisingly the extension, diversity and conservation value of submerged macrophytes was higher in managed compared to unmanaged lakes. Submerged macrophytes are thought to be strongly affected by popular fisheries-management actions, particularly by stocking of benthivorous fish such as common carp (Bajer et al., 2016; Miller & Crowl, 2006). Matern et al. (2019) studied some of the lakes that were examined in this study revealing that managed and unmanaged lakes hosted similar biomasses and abundances of fishes. However, given the gears that were used (electrofishing and gill nets) it is likely that Matern et al. (2019) underestimated the abundance and biomass of common carp and other large benthivorous fish (Ravn et al., 2019). These species can thus be expected to be substantially more abundant in managed gravel pit lakes. Bajer et al. (2016) reported a substantial reduction of species richness and extension of macrophytes in North American lakes, and Vilizzi, Tarkan, & Copp (2015) conducted a meta-analysis showing that carp-induced impacts on submerged macrophytes are most likely at biomasses well beyond 200 kg/ha. It is highly unlikely that the lakes that were studied here offered such carp biomasses as most lakes were mesotrophic, and these systems rarely can support more than 200-500 kg of fish per hectare in total (Barthelmes, 1981). Although no absolute biomass data of carp or other species in these studied lakes are available by now, the fact that submerged macrophytes were more diverse and more extended in the angler-managed lakes suggests that co-existence of carp and other fish with a species rich macrophyte community, also in terms of threatened stonewort species (*Chara sp.*, *Nitella sp.*), in recreationally managed lakes is possible. This is in contrast to the common assumption expressed by some aquatic conservation botanists that

angler-managed lakes have less macrophytes (Van de Weyer, Meis, & Krautkrämer, 2015). One reason might be the “intermediate disturbance effect” (Connell, 1978) that leads to better conditions, especially for pioneer species, than extremely disturbed or stable systems would generate. Another reason might be that the carp biomasses necessary to exert substantial impacts on plant species richness were simply not achieved, because either of the insufficient productivity of the lakes studied or many carp are quickly removed by anglers after stocking (Arlinghaus, Hühn, et al., 2017).

In terms of average alpha diversity, no statistical differences were found in species richness and conservation value for most of taxa that were examined (submerged macrophytes, Odonata, herbs, trees, waterfowl, songbirds) among managed and unmanaged lakes. The only exception was amphibians whose conservation value was significantly greater in unmanaged compared to managed lakes. One reason could be that managed gravel pit lakes host a greater diversity of predatory fishes with rather large gapes (Matern et al., 2019), in turn the predation pressure on tadpoles and even adult amphibians (e.g., through pike, *Esox lucius*) is likely greater in managed compared to unmanaged lakes. However, the general amphibian diversity was very low across all lakes. Typically only 1 to 3 species were detected. This is likely the result of the specific habitat conditions in gravel pit lakes that render these systems a suboptimal habitat for amphibians. Both managed and unmanaged lakes host fish (Matern et al., 2019), are rather steeply sloped and located in agricultural and urbanized landscapes with little forest canopy. Other studies showed that amphibian species richness in lakes is promoted by littoral vegetation (Hecnar & M'Closkey, 1998; Shulze, Semlitsch, Trauth, & Williams, 2010), but also habitat heterogeneity and shallow lakes promote species richness (Atauri & de Lucio, 2001; Porej & Hetherington, 2005). All of these conditions are key preferences for the life-cycle and recruitment of amphibians (Trochet et al., 2014), indicating that alternative habitats might be more important targets for amphibian conservation (e.g., temporarily drained ponds or small kettle ponds) than gravel pit lakes (Porej & Hetherington, 2005; Werneke, Kosmac, van de Weyer, Gertzen, & Mutz, 2018).

Previous work has repeatedly shown or implicated strong reductions in bird biodiversity through human disturbances via recreation at lakes, including anglers (Lozano & Malo, 2013; Reichholf, 1970). However, similar species richness and conservation value of both waterfowl and riparian songbirds were found in managed and unmanaged lakes. In fact this study was unable to reject the key hypothesis of no differences in aquatic and riparian biodiversity (here: species richness and conservation value) in and at angler-managed lakes compared to unmanaged ones. Therefore, we conclude that with few exceptions (in particular amphibians, this study, and fish, Matern et al., 2019) managed and unmanaged lakes host a species inventory, including birds, of largely similar richness and conservation value. However, it has to be noted that gravel pits as a specific kind of stagnant,

small, artificial waterbodies principally can serve only parts of the total species inventory with corresponding habitat preferences.

# *Environmental determinants of biodiversity in gravel pit lakes*

The multivariate analyses showed that the different taxa did not vary uniformly in terms of richness and conservation value among lakes. For example, lakes that offer high richness for amphibians (dimension 1 of PCA, Table S11) may not be offering high richness for riparian trees (dimension 3 of PCA, Table S11) and lakes offering high richness for submerged macrophytes (dimension 2 of PCA, Table S11) may not necessarily offer high richness for waterfowl (dimension 4 of PCA, Table S11). This finding disagrees with a related study from managed shallow ponds by Lemmens et al. (2013). These authors examined strictly aquatic taxa with corresponding trophic requirements (zooplankton, macrophytes, benthic invertebrates), revealing uniform responses in species richness across taxa and ponds. Given that both aquatic and riparian taxa were examined, the lack of uniform responses can be explained by taxa-specific habitat requirements and trophic responses that differ among species that depend purely on in-lake conditions (e.g., submerged macrophytes) compared to those that are more strongly governed by habitat connectivity and land use practices (e.g., amphibians). Also, bigger lakes in a wider regional range were sampled, where Lemmens et al. (2013) did their study in a spatial constrained setting with very small artificial lakes (< 2.5 ha).

This analysis indicated that the variation in species richness is most strongly governed by available habitat and habitat quality (in particular related to vegetation and woody habitat), the morphology (area, shoreline development and slope steepness) of a lake and the surrounding land use (represented by degree of agriculture). By contrast, species richness across taxa was not a significant function of recreational fisheries management when considering a set of environmental variables. Thus, a sustainable use of gravel pit lakes by anglers is not a significant constraint to the establishment of a water type specific species rich aquatic and riparian community. Mosaics of different habitats (reeds, overhanging trees etc.) constitute highly suitable habitat for a range of taxa (Kaufmann et al., 2014), and relatedly it was also found that managed lakes hosting a stronger vegetation gradient offered higher species richness of submerged macrophytes and Odonata. By contrast, extended woody habitat both in water and particularly in the riparian zone was correlated with increased tree diversity, but reduced riparian diversity of herb species, amphibians and songbirds as well as reduced conservation value of songbirds. Perhaps, the regular shoreline development activities by anglers create disturbances (Dustin & Vondracek, 2017; O'Toole et al., 2009) that regularly interrupt the successions of tree stands thereby reducing the shading effects of the riparian zone (Balandier et al., 2008; Monk & Gabrielson, 1985), in turn creating diverse habitats of herb and reed habitats important for a range of species (Paracuellos, 2006; Shulze et al., 2010). This work suggests that anglers can substantially advance riparian biodiversity by properly managing

lake shorelines and thereby contributing to the biodiversity value of the lakes they predominantly manage for fish diversity and abundance only. Alternatively viewed, the traditional fisheries-management actions do seemingly not constrain the establishment of a diverse community of species that does not differ in average richness to unmanaged lakes. Hence, constraining or even banning recreational fisheries from gravel pits seems unsupported in regard to the underlying justification of possible impacts on species richness and conservation value.

The relationship between woody habitat and the richness of riparian vegetation that was found can be explained by the shading effect of trees (at the shore or fallen in the water) on herbal vegetation (Balandier et al., 2008; Monk & Gabrielson, 1985), which leads to less vegetation cover and therefore to reduced species richness following species-area-relationships (Brown, 1995). It is obvious that with more submerged macrophyte coverage more submerged macrophyte species can be expected to occur and also the Odonata species benefit from more vegetated littoral habitats (Foote & Rice Hornung, 2005; Remsburg & Turner, 2009). Macrophyte and Odonata species richness were also positively correlated with the extension of agriculture in proximity. More agriculture is often associated with higher nutrient loads, in run-offs as well as the groundwater (Lawniczak et al., 2016). Although, no effect of the productivity variables could be seen, this might have impacted submerged macrophytes by altering species composition. For example, Stefanidis et al. (2019) found positive effects of high nitrate nitrogen ( $> 1 \text{ mg/L}$ ) and phosphate ( $> 0.1 \text{ mg/L}$ ) concentrations on species richness in greek lakes. The agricultural index was also correlated with the degree of excavation (Figure 3b, Table S8). Dragonflies often use secondary habitats like excavation sites as step-stones for distribution and colonization (Buczyński, 1999), which could explain the positive effect of these land use elements on Odonata species richness in the studied systems.

The songbird diversity (and their conservation value) responded negatively to an index of extension of woody habitat. Most studies dealing with songbirds focus on terrestrial habitats, finding that habitat heterogeneity and forests promote species richness in this taxon (Atauri & de Lucio, 2001; Tellería, Santos, Sánchez, & Galarza, 1992). Only few studies look at riparian songbirds, revealing positive effects of reed and tall herbaceous structure and/or intermediate forests (e.g., shrubs) when considering a smaller spatial scale such as ours (Paracuellos, 2006). This essential habitat will be negatively affected by extensive woody habitat (i.e., large trees; Balandier et al., 2008; Monk & Gabrielson, 1985), possibly explaining the correlations of this study. The species richness of waterfowl was strongly governed by the lake area and the steepness of the shoreline, which can be interpreted as larger and shallower lakes having a higher richness of waterfowl species than smaller and deeper lakes, confirming earlier findings (Elmberg, Nummi, Poysa, & Sjöberg, 2006; Paszkowski & Tonn, 2000).

Collectively, this data do not support assumptions of substantial negative impacts of recreational fisheries management on the species richness and conservation value of waterfowl and songbirds present at gravel pit lakes when benchmarked against unmanaged reference systems of similar ecology and origin. It is important to note that whole-lake metrics were examined and not the abundances of specific taxa or breeding successes. Also, this work constitutes a comparative approach where lakes were not randomly allocated to either angler managed or controls. Therefore, it cannot conclusively be stated that recreational fishing will not impact bird populations. However, the study by Cryer, Linley, Ward, Stratford, & Randerson (1987) conducted in artificial lakes revealed only distributional changes of waterfowl to the presence of anglers, and no changes to abundance. Similarly negligible effects of anglers on birds were reported by Somers, Heisler, Doucette, Kjoss, & Brigham (2015). Specific for gravel pit lakes, Bell et al. (2018) failed to find evidence for recreational use impacts on community structure of waterfowl, but selected species, in particular diving waterfowl, responded through reduced abundance to the presence of anglers and other recreationists. Yet, other environmental factors related to habitat quality and size of the ecosystem were typically more important than the use of the shoreline by anglers, and management of shorelines benefited grazing waterfowl by opening up sites among the terrestrial and aquatic habitats (Bell et al. 2018). Thus, the often-cited assumption that anglers alter species diversity of birds (Reichholf, 1970, 1988) does not necessarily hold, and here no impacts at the species presence levels were detected compared to unmanaged lakes.

Compared to the among-lake variation in species richness, the conservation value of the detected species was much more random and less clearly correlated with overarching environmental factors, which might have resulted from the weighting factor assigned to the species classified as threatened. In this study the number of threatened species was overall low. But threatened and rare species might have very specific habitat requirements (Lindenmayer, 1989; Magurran & Henderson, 2003) and are also more likely missed in field surveys (Yoccoz, Nichols, & Boulinier, 2001; Zhang et al., 2014). Importantly, when accounting for environmental factors, fisheries management dropped out as a relevant predictor of species richness, and management was positively, rather than negatively, associated with the conservation value of aquatic taxa that were examined (submerged macrophytes, Odonata and waterfowl). This indicates that fisheries management and the associated recreational use is not per se a constraint for the establishment of a substantial species inventory of aquatic and riparian taxa.

#### *Limitations*

Our study has a number of limitations. The first relates to the fact that a space-for-time replication design was used that lends itself to a correlational study that has to be interpreted in light of the gradients that have been able to be sampled. Obviously, environmental variables differing from the

ones that were observed may lead to different conclusions (e.g., higher recreational use intensity than present in the studied landscape). Secondly, all the lakes of this study were situated in agricultural environments and this study lacked any lakes without any form of recreational use. This background disturbance (Liley, Underhill-Day, Panter, Marsh, & Roberts, 2015), either through recreation or other human-induced disturbances (e.g., noise from railways or roads), may have affected the species pool to be sampled independent of the studies variables of interest. There is also the possibility for sampling effects, especially for seasonal and migratory taxa (e.g., Odonata, amphibians, waterfowl), and rare species were likely to be missed (Yoccoz et al., 2001). We think, however, that a possible bias in the sampling would not affect the conclusions by being a systematic effect affecting both lake types. Finally, the recreational use that was measured was directly captured mainly during weekdays when the field visits at the lakes were done. Thus, high intensity phases during the weekends might have been undersampled. But, as further surrogates in multivariate indexes of recreational use were used (e.g., litter, angling sites, trails etc.), we consider a robust dimension of recreational use to be identified. However, this index integrated both anglers and non-anglers such that this study ultimately cannot conclusively disentangle the isolated effect of angling-induced disturbances from other recreational impacts in angler-managed lakes.

## *Conclusions*

This study shows that the presence of anglers and actions associated with recreational fisheries management, even if it is affecting the fish communities via adding piscivorous and other highly demanded species to gravel pits (see Matern et al., 2019), is not a constraint to the establishment of a rich biodiversity of aquatic and riparian taxa traditionally not considered from a fisheries perspective. The different taxa that were investigated did not respond uniformly to the presence of fisheries-management and were driven by a set of overarching habitat- and other environmental factors unrelated to recreational fisheries management. Thus, when judged on the metrics used in this work (species richness and conservation value of the species pool) co-existence of recreational fisheries and aquatic and riparian biodiversity of high conservation value and richness is possible under the specific ecological conditions offered by gravel pit lakes in agricultural landscapes. When examined as a whole, given the negligible differences in both species diversity and conservation value across most taxa in managed and unmanaged lakes and in light of the lack of faunal breaks observed for most of the taxa that were studied, this study does not support the idea that selectively constraining recreational fishing from gravel pit lakes will offer substantial conservation gains, as long as other recreational uses continue to be present and lakes are situated in disturbed cultural landscapes. Instead, we recommend specifically considering the location of specific lakes in the landscape when deciding about local and lake-specific conservation actions (Lemmens et al., 2015; Werneke et al., 2018). We also propose to work together with anglers and attempt to create and

683 maintain a mosaic of different habitat types in the riparian zone of lakes, thereby fostering the co-  
 684 existence of people and nature for the benefit of all. By contrast, selective bans of anglers from  
 685 gravel pit lakes with the aim to foster species richness and conservation value of selected taxa is not  
 686 supported under the conditions offered by gravel pit lakes in Lower Saxony. These results likely hold  
 687 for many other states in highly populated states. While gravel pits are suitable habitats for a range of  
 688 species, effective amphibian conservation seems impossible in these systems. Instead, fish free  
 689 ponds and other temporary waters maybe needed to effectively address the current crisis in  
 690 amphibian diversity (Scheffer et al., 2006; Werneke et al., 2018).



## Acknowledgements

We want to thank Sven Matern for his important help in every stage of this study and we thank Charlotte Robinchon for her productive dead-wood-sampling-internship. We also thank Leander Höhne, Jasper Münnich, Nicola Wegener, Jara Niebuhr, Natalie Arnold and Stéphane Mutel for their help with field sampling and data analysis. We thank Christopher Monk, Pieter Lemmens, Miguel Palmer, Jörg Freyhof and Petr Zajicek for their advice during data processing, analysis and interpretation. We thank Sabine Hilt and Klaus van de Weyer for training and advices on macrophyte sampling. We thank Tobias Goldhammer and the chemical lab of IGB for help with water samples. We specifically thank the work of Barbara Stein. We thank Jan Hallermann, Asja Vogt, Alexander Türck and Jürgen Schreiber for helping with material and equipment. Moreover, we thank Angelsportverein Leer u. Umgebung e.V., Bezirksfischereiverband für Ostfriesland e.V., Angler-Verein Nienburg e.V., ASV Neustadt am Rübenberge e.V., Fischereiverein Hannover e.V., Niedersächsisch-Westfälische Anglervereinigung e.V., Ralf Gerken, Heike Vullmer and the Stiftung Naturschutz im Landkreis Rotenburg (Wümme), Henning Scherfeld, FV Peine-Ilse u. Umgebung e.V., SFV Helmstedt u. Umgebung e.V., Verein der Sportfischer Verden (Aller) e.V., Verein für Fischerei und Gewässerschutz Schönewörde u. Umgebung e.V., Steffen Göckemeyer, the Xella Kalksandsteinwerke Niedersachsen GmbH & Co. KG, Thomas Reimer, Melanie and Heinz H. Nordmeyer, Achaz von Hardenberg, Johann Augustin, Dieter Klensang, Elke Dammann, Cordula Stein and Holcim Germany, Thomas Klefoth, Matthias Emmrich and the Angling Association of Lower Saxony for participating in this study. The presented study was jointly financed by the German Federal Ministry of Education and Research (BMBF) and the German Federal Agency for Nature Conservation (BfN) with funds granted by the German Federal Ministry for the Environment, Nature Conservation and Nuclear Safety (BMU) within the BAGGERSEE-Projekt (grant number: 01LC1320A; [www.baggerseeforschung.de](http://www.baggerseeforschung.de)). Additional funding came through the STÖRBAGGER-project via the Landesverband Sächsischer Angler e.V., the Landesfischereiverband Bayern e.V., and the Angling Association of Lower Saxony (<https://www.ifishman.de/en/projects/stoerbagger/>), the Stiftung Fischerei, Umwelt- und Naturschutz Deutschland (FUND Stiftung) and the BMBF through the Aquatag project (the German Federal Ministry of Education and Research (grant 01LC1826E). The funders had no role in the design, analysis and interpretation of the data.

## References

- 719 AdV - Working Committee of the Surveying Authorities of the States of the Federal Republic of  
720 Germany. (2006). *Documentation on the Modelling of Geoinformation of Official Surveying and*  
721 *Mapping (GeoInfoDok )* (S. Afflerbach & W. Kunze, eds.). Retrieved from [http://www.adv-](http://www.adv-online.de/AAA-Modell/Dokumente-der-GeoInfoDok/GeoInfoDok-6.0/)  
722 [online.de/AAA-Modell/Dokumente-der-GeoInfoDok/GeoInfoDok-6.0/](http://www.adv-online.de/AAA-Modell/Dokumente-der-GeoInfoDok/GeoInfoDok-6.0/)
- 723 Altmüller, R., & Clausnitzer, H.-J. (2010). Rote Liste der Libellen Niedersachsens und Bremens: 2.  
724 Fassung, Stand 2007. *Informationsdienst Naturschutz Niedersachsen*, 30, 211–238.
- 725 Arlinghaus, R., Alós, J., Beardmore, B., Daedlow, K., Dorow, M., Fujitani, M., ... Wolter, C. (2017).  
726 Understanding and Managing Freshwater Recreational Fisheries as Complex Adaptive Social-  
727 Ecological Systems. *Reviews in Fisheries Science and Aquaculture*, 25(1), 1–41.  
728 <https://doi.org/10.1080/23308249.2016.1209160>
- 729 Arlinghaus, R., Cyrus, E.-M., Eschbach, E., Fujitani, M., Hühn, D., Johnston, F., ... Riepe, C. (2015).  
730 Hand in Hand für eine nachhaltige Angelfischerei. In *Berichte des IGB*. Leibniz-Institut für  
731 Gewässerökologie und Binnenfischerei (IGB) im Forschungsverbund Berlin e. V.
- 732 Arlinghaus, R., Hühn, D., Pagel, T., Beck, M., Rapp, T., & Wolter, C. (2017). Fischereilicher Nutzen und  
733 gewässerökologische Auswirkungen des Besatzes mit Karpfen (*Cyprinus carpio*) in stehenden  
734 Gewässern: Ergebnisse und Schlussfolgerungen aktueller Ganzseeexperimente und Meta-  
735 Analysen. *Fischerei Und Fischmarkt in MV*, (1), 36–46.
- 736 Atauri, J. A., & de Lucio, J. V. (2001). The role of landscape structure in species richness distribution of  
737 birds , amphibians , reptiles and lepidopterans in Mediterranean landscapes. *Landscape*  
738 *Ecology*, 16, 147–159.
- 739 Bajer, P. G., Beck, M. W., Cross, T. K., Koch, J. D., Bartodziej, W. M., & Sorensen, P. W. (2016).  
740 Biological invasion by a benthivorous fish reduced the cover and species richness of aquatic  
741 plants in most lakes of a large North American ecoregion. *Global Change Biology*, 22(12), 3937–  
742 3947. <https://doi.org/10.1111/gcb.13377>
- 743 Balandier, P., Marquier, A., Dumas, Y., Gaudio, N., Philippe, G., Da Silva, D., ... Sinoquet, H. (2008).  
744 Light sharing among different forest strata for sustainable management of vegetation and  
745 regeneration. In *Forestry in achieving millennium goals* (Nov, pp. 81–86). Retrieved from  
746 <https://hal.archives-ouvertes.fr/hal-00468830/document>
- 747 Barthelmes, D. (1981). *Hydrobiologische Grundlagen der Binnenfischerei*. Jena, Germany: VEB Gustav  
748 Fischer Verlag.

- 749 Beardmore, B., Hunt, L. M., Haider, W., Dorow, M., & Arlinghaus, R. (2015). Effectively managing  
750 angler satisfaction in recreational fisheries requires understanding the fish species and the  
751 anglers. *Canadian Journal of Fisheries and Aquatic Sciences*, 72, 500–513.  
752 <https://doi.org/10.1139/cjfas-2014-0177>
- 753 Bell, M. C., Delany, S. N., Millett, M. C., & Pollitt, M. S. (2018). Wintering waterfowl community  
754 structure and the characteristics of gravel pit lakes. *Wildlife Biology*, 3, 65–78.  
755 <https://doi.org/10.2981/wlb.1997.009>
- 756 BfN. (2012). Internethandbuch zu den Arten der FFH-Richtlinie Anhang IV: Amphibien. Retrieved June  
757 6, 2018, from <https://ffh-anhang4.bfn.de/arten-anhang-iv-ffh-richtlinie/amphibien.html/>
- 758 Blanchet, F. G., Legendre, P., & Borcard, D. (2008). Forward Selection of Explanatory Variables.  
759 *Ecology*, 89(9), 2623–2632. Retrieved from <https://www.jstor.org/stable/27650800>
- 760 Blanchette, M. L., & Lund, M. A. (2016). Pit lakes are a global legacy of mining: An integrated  
761 approach to achieving sustainable ecosystems and value for communities. *Current Opinion in*  
762 *Environmental Sustainability*, 23, 28–34. <https://doi.org/10.1016/j.cosust.2016.11.012>
- 763 Braun-Blanquet, J. (1964). *Pflanzensoziologie: Grundzüge der Vegetationskunde* (3rd ed.).  
764 <https://doi.org/10.1007/978-3-7091-4078-9>
- 765 Brown, J. H. (1995). *Macroecology*. Chicago, Illinois, USA: University of Chicago Press.
- 766 Buczyński, P. (1999). Dragonflies (Odonata) of sandpits on south-eastern Poland. *Acta*  
767 *Hydrobiologica*, 41(3/4), 219–230.
- 768 Butchart, S. H. M., Walpole, M., Collen, B., Van Strien, A., Scharlemann, J. P. W., Almond, R. E. A., ...  
769 Watson, R. (2010). Global biodiversity: Indicators of recent declines. *Science*, 328(5982), 1164–  
770 1168. <https://doi.org/10.1126/science.1187512>
- 771 Connell, J. H. (1978). Diversity in tropical rain forests and coral reefs. *Science*, 199(4335), 1302–1310.
- 772 Cryer, M., Linley, N. W., Ward, R. M., Stratford, J. O., & Randerson, P. F. (1987). Disturbance of  
773 overwintering wildfowl by anglers at two reservoir sites in south wales. *Bird Study*, 34(3), 191–  
774 199. <https://doi.org/10.1080/00063658709476961>
- 775 Daedlow, K., Beard, T. D. jr., & Arlinghaus, R. (2011). A property rights-based view on management of  
776 inland recreational fisheries: Contrasting common and public fishing rights regimes in Germany  
777 and the United States. *American Fisheries Society Symposium*, 75, 13–38.
- 778 Damjanović, B., Novković, M., Vesić, A., Živković, M., Radulović, S., Vukov, D., ... Cvijanović, D.

779 (2018). Biodiversity-friendly designs for gravel pit lakes along the Drina River floodplain (the  
780 Middle Danube Basin, Serbia). *Wetlands Ecology and Management*, 27, 1–22.  
781 <https://doi.org/10.1007/s11273-018-9641-8>

782 Dear, E. J., Guay, P.-J., Robinson, R. W., & Weston, M. A. (2015). Distance from shore positively  
783 influences alert distance in three wetland bird species. *Wetlands Ecology and Management*,  
784 23(2), 315–318. <https://doi.org/10.1007/s11273-014-9376-0>

785 DeBoom, C. S., & Wahl, D. H. (2013). Effects of Coarse Woody Habitat Complexity on Predator-Prey  
786 Interactions of Four Freshwater Fish Species. *Transactions of the American Fisheries Society*,  
787 142(6), 1602–1614. <https://doi.org/10.1080/00028487.2013.820219>

788 Dierschke, V. (2016). *Welcher Vogel ist das?: 170 Vögel einfach bestimmen*. Kosmos.

789 DIN EN 1484. (1997). *Water analysis - Guidelines for the determination of total organic carbon (TOC)*  
790 *and dissolved organic carbon (DOC)*.

791 DIN EN ISO 13395. (1996). *Water quality - Determination of nitrite nitrogen and nitrate nitrogen and*  
792 *the sum of both by flow analysis (CFA and FIA) and spectrometric detection (ISO 13395:1996)*.

793 Dudgeon, D., Arthington, A. H., Gessner, M. O., Kawabata, Z.-I., Knowler, D. J., Lévêque, C., ... Sullivan,  
794 C. A. (2006). Freshwater biodiversity: Importance, threats, status and conservation challenges.  
795 *Biological Reviews of the Cambridge Philosophical Society*, 81(2), 163–182.  
796 <https://doi.org/10.1017/S1464793105006950>

797 Dustin, D. L., & Vondracek, B. (2017). Nearshore Habitat and Fish Assemblages along a Gradient of  
798 Shoreline Development. *North American Journal of Fisheries Management*, 37(2), 432–444.  
799 <https://doi.org/10.1080/02755947.2017.1280567>

800 Elmberg, J., Nummi, P., Poysa, H., & Sjöberg, K. (2006). Relationships Between Species Number, Lake  
801 Size and Resource Diversity in Assemblages of Breeding Waterfowl. *Journal of Biogeography*,  
802 21(1), 75. <https://doi.org/10.2307/2845605>

803 EN ISO 11732. (2005). *Water quality - Determination of ammonium nitrogen - Method by flow*  
804 *analysis (CFA and FIA) and spectrometric detection (ISO 11732:1997)*.

805 EN ISO 6878. (2004). *Water quality - Determination of phosphorus - Ammonium molybdate*  
806 *spectrometric method (ISO 6878:1998)*.

807 Erlinger, G. (1981). Der Einfluß kurz- bzw. langfristiger Störungen auf Wasservogelbrutbestände. *Öko-*  
808 *L*, 3(4), 16–19.

- 809 Europäisches Parlament & Rat der europäischen Union. Richtlinie 2009/147/EG des europäischen  
810 Parlaments und des Rates über die Erhaltung wildlebender Vogelarten. , Amtsblatt der  
811 Europäischen Union § (2009).
- 812 European Aggregates Association (UEPG). (2017). Estimates of Aggregates Production data 2017.  
813 Retrieved May 2, 2019, from [http://www.uepg.eu/statistics/estimates-of-production-](http://www.uepg.eu/statistics/estimates-of-production-data/data-2017)  
814 [data/data-2017](http://www.uepg.eu/statistics/estimates-of-production-data/data-2017)
- 815 Ezekiel, M. (1930). Methods of correlation analysis. In *Methods of correlation analysis*. Oxford,  
816 England: Wiley.
- 817 Foote, A. L., & Rice Hornung, C. L. (2005). Odonates as biological indicators of grazing effects on  
818 Canadian prairie wetlands. *Ecological Entomology*, 30, 273–283.  
819 <https://doi.org/10.1111/j.0307-6946.2005.00701.x>
- 820 Franson, J. C., Hansen, S. P., Creekmore, T. E., Brand, C. J., Evers, D. C., Duerr, A. E., & DeStefano, S.  
821 (2003). Lead Fishing Weights and Other Fishing Tackle in Selected Waterbirds. *Waterbirds: The*  
822 *International Journal of Waterbird Biology*, 26(3), 345–352. Retrieved from  
823 <https://www.jstor.org/stable/1522416>
- 824 Frid, A., & Dill, L. M. (2002). Human-caused disturbance stimuli as a form of predation risk.  
825 *Conservation Ecology*, 6(1), 11[online]. Retrieved from <https://www.jstor.org/stable/26271862>
- 826 Garve, E. (2004). Rote Liste und Florenliste der Farn- und Blütenpflanzen in Niedersachsen und  
827 Bremen, 5. Fassung, Stand 1.3.2004. *Informationsdienst Naturschutz Niedersachsen*, 24(1), 1–  
828 76.
- 829 Goëau, H., Bonnet, P., Joly, A., Affouard, A., Bakic, V., Barbe, J., ... Boujemaa, N. (2014). Pl@ntNet  
830 Mobile 2014: Android Port and New Features. *Proceedings of International Conference on*  
831 *Multimedia Retrieval*, (ii), 527:527--527:528. <https://doi.org/10.1145/2578726.2582618>
- 832 Gräler, B., Pebesma, E., & Heuvelink, G. (2016). Spatio-Temporal Interpolation using gstat. *The R*  
833 *Journal*, 8(1), 204–218. Retrieved from [http://journal.r-project.org/archive/2016-1/na-](http://journal.r-project.org/archive/2016-1/na-pebesma-heuvelink.pdf)  
834 [pebesma-heuvelink.pdf](http://journal.r-project.org/archive/2016-1/na-pebesma-heuvelink.pdf)
- 835 Grünberg, C., Bauer, H.-G., Haupt, H., Hüppop, O., Ryslavy, T., & Südbeck, P. (2015). Rote Liste der  
836 Brutvögel Deutschlands, 5. Fassung, 30. November 2015. *Berichte Zum Vogelschutz*, 52, 19–67.
- 837 Heath, A. S. A., Dahlgren, S., Simon, D., & Brooks, M. (2017). Monofilament Fishing Line as a Threat to  
838 American Oystercatchers (*Haematopus palliatus*) on the Texas Coast, USA. *Waterbirds*, 40(sp1),  
839 123. <https://doi.org/10.1675/063.040.sp101>

- 840 Hecnar, S. J., & M'Closkey, R. T. (1997). The effects of predatory fish on amphibian species richness  
841 and distribution. *Biological Conservation*, 79, 123–131. [https://doi.org/10.1016/s0006-](https://doi.org/10.1016/s0006-3207(96)00113-9)  
842 3207(96)00113-9
- 843 Hecnar, S. J., & M'Closkey, R. T. (1998). Species richness patterns of amphibians in southwestern  
844 Ontario ponds. *Journal of Biogeography*, 25(4), 763–772.
- 845 Hein, T. (2018). Libellenwissen. Retrieved June 6, 2018, from <https://libellenwissen.de/>
- 846 Hillebrand, H., Blasius, B., Borer, E. T., Chase, J. M., Downing, J. A., Eriksson, B. K., ... Cadotte, M.  
847 (2018). Biodiversity change is uncoupled from species richness trends: Consequences for  
848 conservation and monitoring. *Journal of Applied Ecology*, 55, 169–184.  
849 <https://doi.org/10.1111/1365-2664.12959>
- 850 IPBES. (2019). *Summary for policymakers of the global assessment report on biodiversity and*  
851 *ecosystem services – unedited advance version* (S. Díaz, J. Settele, E. Brondízio, H. T. Ngo, M.  
852 Guèze, J. Agard, ... H. Mooney, Eds.). Retrieved from  
853 [https://www.ipbes.net/system/tdf/spm\\_global\\_unedited\\_advance.pdf?file=1&type=node&id=](https://www.ipbes.net/system/tdf/spm_global_unedited_advance.pdf?file=1&type=node&id=35245)  
854 35245
- 855 IUCN. (2018). The IUCN Red List of Threatened Species. Version 2018-1. Retrieved from  
856 <http://www.iucnredlist.org>
- 857 Kaufmann, P. R., Hughes, R. M., Whittier, T. R., Bryce, S. A., & Paulsen, S. G. (2014). Relevance of lake  
858 physical habitat indices to fish and riparian birds. *Lake and Reservoir Management*, 30(2), 177–  
859 191. <https://doi.org/10.1080/10402381.2013.877544>
- 860 Kaufmann, P. R., & Whittier, T. R. (1997). Habitat assessment. In J. R. Baker, D. V. Peck, & D. W.  
861 Sutton (Eds.), *Environmental Monitoring and Assessment Program – Surface Waters: Field*  
862 *operations manual for lakes* (pp. 5–1 to 5–26). Retrieved from  
863 <https://archive.epa.gov/emap/archive-emap/web/html/97fldman.html>
- 864 Knight, R. L., Anderson, D. P., & Marr, N. V. (1991). Responses of an Avian Scavenging Guild to  
865 Anglers. *Biological Conservation*, 56(2), 195–205. [https://doi.org/10.1016/0006-3207\(91\)90017-](https://doi.org/10.1016/0006-3207(91)90017-4)  
866 4
- 867 Knorp, N. E., & Dorn, N. J. (2016). Mosquitofish predation and aquatic vegetation determine  
868 emergence patterns of dragonfly assemblages. *Freshwater Science*, 35(1), 114–125.  
869 <https://doi.org/10.1086/684678>
- 870 Kohler, A. (1978). Methoden der Kartierung von Flora und Vegetation von Süßwasserbiotopen.

- 871        *Landschaft Und Stadt*, 10, 73–85.
- 872    Köppel, C. (1995). Kiesgruben - ein Ersatz für Flußauen? *Naturschutz Und Landschaftsplanung*, 27(1),  
873        7–11.
- 874    Korsch, H., Doege, A., Raabe, U., & van de Weyer, K. (2013). Rote Liste der Armleuchteralgen  
875        (Charophyceae) Deutschlands 3. Fassung, Stand: Dezember 2012. *Hausknechtia*, 17(November),  
876        1–32.
- 877    Krüger, T., & Nipkow, M. (2015). Rote Liste der in Niedersachsen und Bremen gefährdeten  
878        Brutvogelarten, 8. Fassung, Stand 2015. *Informationsdienst Naturschutz Niedersachsen*, 35(4),  
879        181–256. Retrieved from  
880        [http://www.nlwkn.niedersachsen.de/naturschutz/veroeffentlichungen/rote-liste-der-in-](http://www.nlwkn.niedersachsen.de/naturschutz/veroeffentlichungen/rote-liste-der-in-niedersachsen-und-bremen-gefaehrdeten-brutvoegel-141167.html)  
881        [niedersachsen-und-bremen-gefaehrdeten-brutvoegel-141167.html](http://www.nlwkn.niedersachsen.de/naturschutz/veroeffentlichungen/rote-liste-der-in-niedersachsen-und-bremen-gefaehrdeten-brutvoegel-141167.html)
- 882    Kühnel, K.-D., Geiger, A., Laufer, H., Podlousky, R., & Schlüpmann, M. (2009). Rote Liste und  
883        Gesamtartenliste der Lurche (Amphibia) und Kriechtiere (Reptilia) Deutschlands [Stand  
884        Dezember 2008]. In H. Haupt, G. Ludwig, H. Gruttke, M. Binot-Hafke, C. Otto, & A. Pauly (Eds.),  
885        *Rote Liste gefährdeter Tiere, Pflanzen und Pilze Deutschlands* (Band 1, pp. 231–288). Bundesamt  
886        für Naturschutz (BfN).
- 887    Landesamt für Statistik Niedersachsen (LSN). (2018). *LSN-Online - Regionaldatenbank*. Hannover,  
888        Germany.
- 889    Landkreis Lüneburg. *Verordnung über das Naturschutzgebiet „Elbeniederung von Hohnstorf bis*  
890        *Artlenburg “ im Flecken Artlenburg und in der Gemeinde Hohnstorf/Elbe in der Samtgemeinde*  
891        *Scharnebeck im Landkreis Lüneburg.* , (2018).
- 892    Lawniczak, A. E., Zbierska, J., Nowak, B., Achtenberg, K., Grzeškowiak, A., & Kanas, K. (2016). Impact  
893        of agriculture and land use on nitrate contamination in groundwater and running waters in  
894        central-west Poland. *Environmental Monitoring and Assessment*, 188(172), 1–17.  
895        <https://doi.org/10.1007/s10661-016-5167-9>
- 896    Legendre, P., & Legendre, L. (2012). *Numerical ecology* (3rd Editio). Elsevier.
- 897    Lehmann, A. W., & Nüss, J. H. (2015). *Libellen - Bestimmungsschlüssel für Nord- und Mitteleuropa* (6.  
898        Auflage). Göttingen, Germany: Deutscher Jugendbund für Naturbeobachtungen.
- 899    Lemmens, P., Mergeay, J., De Bie, T., Van Wichelen, J., De Meester, L., & Declerck, S. A. (2013). How  
900        to maximally support local and regional biodiversity in applied conservation? Insights from pond  
901        management. *PLoS One*, 8, e72538. <https://doi.org/10.1371/journal.pone.0072538>

- 902 Lemmens, P., Mergeay, J., Van Wichelen, J., De Meester, L., & Declerck, S. A. (2015). The Impact of  
903 Conservation Management on the Community Composition of Multiple Organism Groups in  
904 Eutrophic Interconnected Man-Made Ponds. *PLoS One*, 10, e0139371.  
905 <https://doi.org/10.1371/journal.pone.0139371>
- 906 Lewin, W.-C., Mehner, T., Ritterbusch, D., & Brämick, U. (2014). The influence of anthropogenic  
907 shoreline changes on the littoral abundance of fish species in German lowland lakes varying in  
908 depth as determined by boosted regression trees. *Hydrobiologia*, 724, 293–306.  
909 <https://doi.org/10.1007/s10750-013-1746-8>
- 910 Lewin, W.-C., Okun, N., & Mehner, T. (2004). Determinants of the distribution of juvenile fish in the  
911 littoral area of a shallow lake. *Freshwater Biology*, 49, 410–424. [https://doi.org/10.1111/j.1365-](https://doi.org/10.1111/j.1365-2427.2004.01193.x)  
912 [2427.2004.01193.x](https://doi.org/10.1111/j.1365-2427.2004.01193.x)
- 913 Liddle, M. J., & Scorgie, H. R. A. (1980). The effects of recreation on freshwater plants and animals: A  
914 review. *Biological Conservation*, 17(3), 183–206. [https://doi.org/10.1016/0006-3207\(80\)90055-](https://doi.org/10.1016/0006-3207(80)90055-5)  
915 [5](https://doi.org/10.1016/0006-3207(80)90055-5)
- 916 Liley, D., Underhill-Day, J., Panter, C., Marsh, P., & Roberts, J. (2015). *Morecambe Bay Bird*  
917 *Disturbance and Access Management Report. Unpublished report by Footprint Ecology for the*  
918 *Morecambe Bay Partnership.*
- 919 Lindenmayer, D. B. (1989). *The ecology and habitat requirements of Leadbeater's possum*. Australian  
920 National University, Canberra.
- 921 Lozano, J., & Malo, A. F. (2013). Relationships Between Human Activity and Richness and Abundance  
922 of Some Bird Species in the Paraguay River (Pantanal, Brazil). *Ardeola*, 60(1), 99–112.  
923 <https://doi.org/10.13157/arla.60.1.2012.99>
- 924 Ludwig, G., & Schnittler, M. (1996). Rote Liste der Pflanzen Deutschlands. *Schriftenreihe Für*  
925 *Vegetationskunde*, 1–224. Retrieved from  
926 <https://www.bfn.de/fileadmin/MDB/documents/RoteListePflanzen.pdf>
- 927 Magurran, A. E., & Henderson, P. A. (2003). Explaining the excess of rare species in natural species  
928 abundance distributions. *Nature*, 422, 714–716.
- 929 Mallory, E. C., Ridgway, M. S., Gordon, A. M., & Kaushik, N. K. (2000). Distribution of woody debris in  
930 a small headwater lake, central Ontario, Canada. *Archiv Für Hydrobiologie*, 148(4), 587–606.  
931 Retrieved from <https://www.cabdirect.org/cabdirect/abstract/20013014468>
- 932 Mantoura, R. F. C., & Llewellyn, C. A. (1983). The rapid determination of algal chlorophyll and



- 933 carotenoid pigments and their breakdown products in natural waters by reverse-phase high-
- 934 performance liquid chromatography. *Analytica Chimica Acta*, 151(C), 297–314.
- 935 [https://doi.org/10.1016/S0003-2670\(00\)80092-6](https://doi.org/10.1016/S0003-2670(00)80092-6)
- 936 Mardia, K. V., Kent, J. T., & Bibby, J. M. (1979). *Multivariate Analysis*. London: Academic Press.
- 937 Matern, S., Emmrich, M., Klefoth, T., Wolter, C., Nikolaus, R., Wegener, N., & Arlinghaus, R. (2019).
- 938 Effect of recreational-fisheries management on fish biodiversity in gravel pit lakes, with
- 939 contrasts to unmanaged lakes. *Journal of Fish Biology*, 94, 865–881.
- 940 <https://doi.org/10.1111/jfb.13989>
- 941 Matthews, W. J. (1986). Fish faunal “breaks” and stream order in the eastern and central United
- 942 States. *Environmental Biology of Fishes*, 17(2), 81–92. <https://doi.org/10.1007/BF00001739>
- 943 McFadden, T. N., Herrera, A. G., & Navedo, J. G. (2017). Waterbird responses to regular passage of a
- 944 birdwatching tour boat: Implications for wetland management. *Journal for Nature Conservation*,
- 945 40, 42–48. <https://doi.org/10.1016/J.JNC.2017.09.004>
- 946 Miller, S. A., & Crowl, T. A. (2006). Effects of common carp (*Cyprinus carpio*) on macrophytes and
- 947 invertebrate communities in a shallow lake. *Freshwater Biology*, 51(1), 85–94.
- 948 <https://doi.org/10.1007/s00198-005-1915-3>
- 949 Miró, A., Sabás, I., & Ventura, M. (2018). Large negative effect of non-native trout and minnows on
- 950 Pyrenean lake amphibians. *Biological Conservation*, 218, 144–153.
- 951 <https://doi.org/10.1016/j.biocon.2017.12.030>
- 952 Monk, C. D., & Gabrielson, F. C. J. (1985). Effects of Shade, Litter and Root Competition on Old-Field
- 953 Vegetation in South Carolina. *Bulletin of the Torrey Botanical Club*, 112(4), 383–392. Retrieved
- 954 from <https://www.jstor.org/stable/2996039>
- 955 Müller, H. (2012). *Zulässigkeit und Grenzen der Ausgestaltung/Einschränkung von Fischereirechten an*
- 956 *Baggerseen; Rechtsgutachten*. Bezirksfischereiverband Oberfranken e.V.,
- 957 Landesfischereiverband Bayern e.V.
- 958 Müller, Z., Jakab, T., Tóth, A., Dévai, G., Szállassy, N., Kiss, B., & Horváth, R. (2003). Effect of sports
- 959 fisherman activities on dragonfly assemblages on a Hungarian river floodplain. *Biodiversity and*
- 960 *Conservation*, 12, 167–179.
- 961 Murphy, J., & Riley, J. P. (1962). A modified single solution method for the determination of
- 962 phosphate in natural water. *Analytica Chimica Acta*, 27, 31–36.
- 963 Neter, J., Kutner, M. H., Nachtsheim, C. J., & Wasserman, W. (1996). *Applied linear statistical models*

- 964 (Fourth Edi). Chicago, Illinois, USA: Irwin.
- 965 Newbrey, M. G., Bozek, M. A., Jennings, M. J., & Cook, J. E. (2005). Branching complexity and  
966 morphological characteristics of coarse woody structure as lacustrine fish habitat. *Canadian*  
967 *Journal of Fisheries and Aquatic Sciences*, 62(9), 2110–2123. <https://doi.org/10.1139/f05-125>
- 968 Niesar, M., Arlinghaus, R., Rennert, B., & Mehner, T. (2004). Coupling insights from a carp, *Cyprinus*  
969 *carpio*, angler survey with feeding experiments to evaluate composition, quality and  
970 phosphorus input of groundbait in coarse fishing. *Fisheries Management and Ecology*, 11(3-4),  
971 225–235. <https://doi.org/10.1111/j.1365-2400.2004.00400.x>
- 972 O'Toole, A. C., Hanson, K. C., & Cooke, S. J. (2009). The effect of shoreline recreational angling  
973 activities on aquatic and riparian habitat within an urban environment: Implications for  
974 conservation and management. *Environmental Management*, 44(2), 324–334.  
975 <https://doi.org/10.1007/s00267-009-9299-3>
- 976 Oertli, B., Joye, D. A., Castella, E., Juge, R., Cambin, D., & Lachavanne, J.-B. (2002). Does size matter?  
977 The relationship between pond area and biodiversity. *Biological Conservation*, 104, 59–70.
- 978 Osgood, R. A. (2005). Shoreline density. *Lake and Reservoir Management*, 21(1), 125–126.  
979 <https://doi.org/10.1080/07438140509354420>
- 980 Ott, J., Conze, K.-J., Günther, A., Lohr, M., Mauersberger, R., Roland, H.-J., & Suhling, F. (2015). Rote  
981 Liste und Gesamtartenliste der Libellen Deutschlands mit Analyse der Verantwortlichkeit, dritte  
982 Fassung, Stand Anfang 2012 (Odonata). *Libellula Supplement*, 14, 395–422.
- 983 Paracuellos, M. (2006). Relationships of songbird occupation with habitat configuration and bird  
984 abundance in patchy reed beds. *Ardea*, 94(1), 87–98.
- 985 Paszkowski, C. A., & Tonn, W. M. (2000). Effects of lake size, environment, and fish assemblage on  
986 species richness of aquatic birds. *Internationale Vereinigung Für Theoretische Und Angewandte*  
987 *Limnologie: Verhandlungen*, 27(1), 178–182. <https://doi.org/10.1080/03680770.1998.11901222>
- 988 Pimm, S. L., Jenkins, C. N., Abell, R., Brooks, T. M., Gittleman, J. L., Joppa, L. N., ... Sexton, J. O. (2014).  
989 The biodiversity of species and their rates of extinction, distribution, and protection. *Science*,  
990 344(6187), 1246752. <https://doi.org/10.1126/science.1246752>
- 991 Podlousky, R., & Fischer, C. (1994). Rote Listen der gefährdeten Amphibien und Reptilien in  
992 Niedersachsen und Bremen. *Informationsdienst Naturschutz Niedersachsen*, 14(4), 119–120.
- 993 Porej, D., & Hetherington, T. E. (2005). Designing Wetlands for Amphibians: The Importance of  
994 Predatory Fish and Shallow Littoral Zones in Structuring of Amphibian Communities. *Wetlands*

- 995        *Ecology and Management*, 13, 445–455. <https://doi.org/10.1007/s11273-004-0522-y>
- 996    Preising, E., Vahle, H.-C., Brandes, D., Hofmeister, H., Tüxen, J., & Weber, H. E. (1990). Die
- 997        Pflanzengesellschaften Niedersachsens-Bestandsentwicklung, Gefährdung und Schutzprobleme:
- 998        Salzpflanzengesellschaften der Meeresküste und des Binnenlandes // Wasser- und
- 999        Sumpfpflanzengesellschaften des Süßwassers. In B. Pilgrim (Ed.), *Naturschutz Landschaftspflege*
- 1000        *Niedersachsens* (Heft 20/7-). Hannover, Germany: Niedersächsisches Landesamt für Ökologie -
- 1001        Naturschutz -.
- 1002    R Core Team. (2013). *R: A language and environment for statistical computing*. Vienna, Austria.
- 1003    Randler, C. (2006). Disturbances by dog barking increase vigilance in coots *Fulica atra*. *European*
- 1004        *Journal of Wildlife Research*, 52(4), 265–270. <https://doi.org/10.1007/s10344-006-0049-z>
- 1005    Rat der europäischen Gemeinschaft. Richtlinie 92/43/EWG des Rates vom 21.Mai 1992 zur Erhaltung
- 1006        der natürlichen Lebensräume sowie der wildlebenden Tiere und Pflanzen. , Amtsblatt der
- 1007        Europäischen Union § (1992).
- 1008    Ravn, H. D., Lauridsen, T. L., Jepsen, N., Jeppesen, E., Hansen, P. G., Hansen, J. G., & Berg, S. (2019). A
- 1009        comparative study of three different methods for assessing fish communities in a small
- 1010        eutrophic lake. *Ecology of Freshwater Fish*, 28(2), 341–352. <https://doi.org/10.1111/eff.12457>
- 1011    Reichholf, J. (1970). Der Einfluß von Störung durch Angler auf den Entenbrutbestand auf den
- 1012        Altwässern am Unteren Inn. *Vogelwelt*, 91, 68–72.
- 1013    Reichholf, J. (1988). Auswirkung des Angelns auf die Brutbestände von Wasservögeln im
- 1014        Feuchtgebiet von internationaler Bedeutung “Unterer Inn.” *Vogelwelt*, 109(Heft 5/6), 206–221.
- 1015    Reid, A. J., Carlson, A. K., Creed, I. F., Eliason, E. J., Gell, P. A., Johnson, P. T. J., ... Cooke, S. J. (2019).
- 1016        Emerging threats and persistent conservation challenges for freshwater biodiversity. *Biological*
- 1017        *Reviews*, 94(3), 849–873. <https://doi.org/10.1111/brv.12480>
- 1018    Remsburg, A. J., & Turner, M. G. (2009). Aquatic and terrestrial drivers of dragonfly (Odonata)
- 1019        assemblages within and among north-temperate lakes. *Journal of the North American*
- 1020        *Benthological Society*, 28(1), 44–56. <https://doi.org/10.1899/08-004.1>
- 1021    Reynaud, A., & Lanzaova, D. (2017). A Global Meta-Analysis of the Value of Ecosystem Services
- 1022        Provided by Lakes. *Ecological Economics*, 137, 184–194.
- 1023        <https://doi.org/10.1016/j.ecolecon.2017.03.001>
- 1024    Riedmüller, U., Hoehn, E., & Mischke, U. (2013). *Auswerte-Tool für die Trophie-Klassifikation von*
- 1025        *Seen. Trophie-Index nach LAWA*.

- 1026 Sala, O. E., Chapin III, F. S., Armesto, J. J., Berlow, E., Bloomfield, J., Dirzo, R., ... Wall, D. H. (2000).  
1027 Global biodiversity scenarios for the year 2100. *Science*, 287, 1770–1774. Retrieved from  
1028 <https://www.ncbi.nlm.nih.gov/pubmed/10710299>
- 1029 Santoul, F., Gaujard, A., Angélibert, S., Mastrorillo, S., & Céréghino, R. (2009). Gravel pits support  
1030 waterbird diversity in an urban landscape. *Hydrobiologia*, 634(1), 107–114.  
1031 <https://doi.org/10.1007/s10750-009-9886-6>
- 1032 Saulnier-Talbot, É., & Lavoie, I. (2018). Uncharted waters: The rise of human-made aquatic  
1033 environments in the age of the “Anthropocene.” *Anthropocene*, 23, 29–42.  
1034 <https://doi.org/10.1016/j.ancene.2018.07.003>
- 1035 Schaumburg, J., Schranz, C., Stelzer, D., & Vogel, A. (2014). *Verfahrensanleitung für die ökologische*  
1036 *Bewertung von Seen zur Umsetzung der EG-Wasserrahmenrichtlinie: Makrophyten und*  
1037 *Phytobenthos* (Version Ok). Retrieved from  
1038 [http://www.lfu.bayern.de/wasser/gewaesserqualitaet\\_seen/phylib\\_deutsch/verfahrensanleitung/doc/verfahrensanleitung\\_seen.pdf](http://www.lfu.bayern.de/wasser/gewaesserqualitaet_seen/phylib_deutsch/verfahrensanleitung/doc/verfahrensanleitung_seen.pdf)  
1039
- 1040 Scheffer, M., Van Geest, G. J., Zimmer, K., Jeppesen, E., Søndergaard, M., Butler, M. G., ... De  
1041 Meester, L. (2006). Small habitat size and isolation can promote species richness: Second-order  
1042 effects on biodiversity in shallow lakes and ponds. *Oikos*, 112(1), 227–231. [https://doi.org/DOI](https://doi.org/10.1111/j.0030-1299.2006.14145.x)  
1043 [10.1111/j.0030-1299.2006.14145.x](https://doi.org/10.1111/j.0030-1299.2006.14145.x)
- 1044 Scheuhammer, A. M., & Norris, S. L. (1996). The ecotoxicology of lead shot and lead fishing weights.  
1045 *Ecotoxicology*, 5, 279–295. <https://doi.org/10.1007/BF00119051>
- 1046 Schlüpmann, M. (2005). Bestimmungshilfen: Faden- und Teichmolch-Weibchen, Braunfrösche,  
1047 Wasser- oder Grünfrösche, Eidechsen, Schlingnatter und Kreuzotter, Ringelnatter- Unterarten.  
1048 *Rundbrief zur Herpetofauna von Nordrhein-Westfalen*, 28, 1–38. Retrieved from  
1049 <http://www.herpetofauna-nrw.de>
- 1050 Schurig, H. (1972). Der Baggersee—ein neuer Gewässertyp. *Österreichische Fischerei*, 25(1), 1–5.
- 1051 Shulse, C. D., Semlitsch, R. D., Trauth, K. M., & Williams, A. D. (2010). Influences of Design and  
1052 Landscape Placement Parameters on Amphibian Abundance in Constructed Wetlands.  
1053 *Wetlands*, 30, 915–928. <https://doi.org/10.1007/s13157-010-0069-z>
- 1054 Šidák, Z. (1967). Rectangular Confidence Regions for the Means of Multivariate Normal Distributions.  
1055 *Journal of the American Statistical Association*, 62(318), 626–633.  
1056 <https://doi.org/10.1080/01621459.1967.10482935>

- 1057 Somers, C. M., Heisler, L. M., Doucette, J. L., Kjoss, V. A., & Brigham, R. M. (2015). Lake Use by Three  
1058 Avian Piscivores and Humans: Implications for Angler Perception and Conservation. *Journal of*  
1059 *Open Ornithology*, 8, 10–21.
- 1060 Sørensen, T. A. (1948). A method of establishing groups of equal amplitude in plant sociology based  
1061 on similarity of species content and its application to analyses of the vegetation on Danish  
1062 commons. *Biol. Skar.*, 5(4), 1–34.
- 1063 Spohn, M., Golte-Bechtle, M., & Spohn, R. (2015). *Was blüht denn da?* (59. Auflag). Stuttgart,  
1064 Germany: Kosmos-Verlag.
- 1065 Spyra, A., & Strzelec, M. (2019). The implications of the impact of the recreational use of forest  
1066 mining ponds on benthic invertebrates with special emphasis on gastropods. *Biologia*.  
1067 <https://doi.org/10.2478/s11756-019-00221-2>
- 1068 Stefanidis, K., Sarika, M., & Papastegiadou, E. (2019). Exploring environmental predictors of aquatic  
1069 macrophytes in water-dependent Natura 2000 sites of high conservation value: Results from a  
1070 long-term study of macrophytes in Greek lakes. *Aquatic Conservation: Marine and Freshwater*  
1071 *Ecosystems*, 1–16. <https://doi.org/10.1002/aqc.3036>
- 1072 Tellería, J. L., Santos, T., Sánchez, A., & Galarza, A. (1992). Habitat structure predicts bird diversity  
1073 distribution in iberian forests better than climate. *Bird Study*, 39(1), 63–68.  
1074 <https://doi.org/10.1080/00063659209477100>
- 1075 Trochet, A., Moulherat, S., Calvez, O., Stevens, V., Clobert, J., & Schmeller, D. (2014). A database of  
1076 life-history traits of European amphibians. *Biodiversity Data Journal*, 2, e4123.  
1077 <https://doi.org/10.3897/BDJ.2.e4123>
- 1078 Van de Weyer, K. (2003). Vegetationskundliche Erhebungen in Nassabgrabungen – Ergebnisse von  
1079 Tauchuntersuchungen im Niederrheinischen Tiefland. *Tuexenia*, 23, 307–314.
- 1080 Van de Weyer, K., Meis, S., & Krautkrämer, V. (2015). Die Makrophyten des Großen Stechlinsees, des  
1081 Wummsees und des Wittwesees. *Fachbeitrag Des LUGV*, 145, 1–92.
- 1082 Van de Weyer, K., & Schmitt, C. (2011). Bestimmungsschlüssel für die aquatischen Makrophyten  
1083 (Gefäßpflanzen, Armleuchteralgen und Moose) in Deutschland: Band 1: Bestimmungsschlüssel.  
1084 *Fachbeiträge Des LUGV Brandenburg*, 119, 164pp. <https://doi.org/10.1109/CDC.2012.6427112>
- 1085 Van der Maarel, E. (1979). Transformation of cover-abundance values in phytosociology and its  
1086 effects on community similarity. *Vegetatio*, 39(2), 97–114. <https://doi.org/10.1007/bf00052021>
- 1087 Venohr, M., Langhans, S. D., Peters, O., Hölker, F., Arlinghaus, R., Mitchell, L., & Wolter, C. (2018).

- 1088        The underestimated dynamics and impacts of water-based recreational activities on freshwater  
1089        ecosystems. *Environmental Reviews*, 26, 199–213. <https://doi.org/10.1139/er-2017-0024>
- 1090        Vilizzi, L., Tarkan, A. S., & Copp, G. H. (2015). Experimental Evidence from Causal Criteria Analysis for  
1091        the Effects of Common Carp *Cyprinus carpio* on Freshwater Ecosystems: A Global Perspective.  
1092        *Reviews in Fisheries Science and Aquaculture*, 23(3), 253–290.  
1093        <https://doi.org/10.1080/23308249.2015.1051214>
- 1094        Völkl, W. (2010). *Die Bedeutung und Bewertung von Baggerseen für Fische, Vögel, Amphibien und*  
1095        *Libellen: Vereinbarkeit der fischereilichen Nutzung mit den Anforderungen des Naturschutzes*  
1096        *[Artenvielfalt an und in Baggerseen]*. Bayreuth: Bezirk Oberfranken, Fachberatung für Fischerei.
- 1097        Werneke, U., Kosmac, U., van de Weyer, K., Gertzen, S., & Mutz, T. (2018). Zur naturschutzfachlichen  
1098        Bedeutung eines fischfreien Sees. *Natur in NRW*, 3, 27–32. Retrieved from internal-  
1099        pdf://156.38.243.135/WernekeEtAl\_2018.pdf
- 1100        Wichmann, G. (2010). Disturbance from angling during the breeding season: Its influence on  
1101        waterbirds and reedbed birds in the Untere Lobau (Danube Forests National Park). *Egretta*, 51,  
1102        108–113. Retrieved from [http://www.landmuseum.at/pdf\\_frei\\_baende/31364.pdf#page=110](http://www.landmuseum.at/pdf_frei_baende/31364.pdf#page=110)
- 1103        Winfield, I. J. (2004). Fish in the littoral zone: Ecology, threats and management. *Limnologica*, 34,  
1104        124–131. [https://doi.org/10.1016/S0075-9511\(04\)80031-8](https://doi.org/10.1016/S0075-9511(04)80031-8)
- 1105        Wolter, C., & Arlinghaus, R. (2003). Navigation impacts on freshwater fish assemblages: The  
1106        ecological relevance of swimming performance. *Reviews in Fish Biology and Fisheries*, 13, 63–  
1107        89. <https://doi.org/10.1023/A:1026350223459>
- 1108        Wright, S. W. (1991). Improved HPLC method for the analysis of chlorophylls and carotenoids from  
1109        marine phytoplankton. *Marine Ecology Progress Series*, 77(2–3), 183–196.  
1110        <https://doi.org/10.3354/meps077183>
- 1111        WWF. (2018). *Living Planet Report - 2018: Aiming Higher* (M. Grooten & R. E. . Almond, Eds.).  
1112        Retrieved from [https://www.wwf.de/fileadmin/user\\_upload/living-planet-](https://www.wwf.de/fileadmin/user_upload/living-planet-report/2018/WWF_Living_Planet_Report_Englische_Version.pdf)  
1113        [report/2018/WWF\\_Living\\_Planet\\_Report\\_Englische\\_Version.pdf](https://www.wwf.de/fileadmin/user_upload/living-planet-report/2018/WWF_Living_Planet_Report_Englische_Version.pdf)
- 1114        Yoccoz, N. G., Nichols, J. D., & Boulinier, T. (2001). Monitoring of biological diversity in space and  
1115        time. *Trends in Ecology & Evolution*, 16(8), 446–453. [https://doi.org/10.1016/S0169-](https://doi.org/10.1016/S0169-5347(01)02205-4)  
1116        [5347\(01\)02205-4](https://doi.org/10.1016/S0169-5347(01)02205-4)
- 1117        Zhang, J., Nielsen, S. E., Grainger, T. N., Kohler, M., Chipchar, T., & Farr, D. R. (2014). Sampling plant  
1118        diversity and rarity at landscape scales: Importance of sampling time in species detectability.

- 1119 *PLoS ONE*, 9(4), e95334. <https://doi.org/10.1371/journal.pone.0095334>
- 1120 Zhao, T., Grenouillet, G., Pool, T., Tudesque, L., & Cucherousset, J. (2016). Environmental
- 1121 determinants of fish community structure in gravel pit lakes. *Ecology of Freshwater Fish*, 25(3),
- 1122 412–421. <https://doi.org/10.1111/eff.12222>
- 1123

## Tables

Table 1: Descriptors of gravel pits sampled in Lower Saxony. Trophic state was determined using Riedmüller, Hoehn, & Mischke (2013).

| Lake name           | Lake type | Management interventions                                                   | Recreationists identified during on-site visits           | Trophic state | End of mining |
|---------------------|-----------|----------------------------------------------------------------------------|-----------------------------------------------------------|---------------|---------------|
| Chodhemster Kolk    | Managed   | recreational fisheries, regular stocking                                   | Anglers, dog walkers                                      | Mesotrophic   | 1971          |
| Collrunge           | Managed   | recreational fisheries, regular stocking                                   | Anglers, dog walkers                                      | Mesotrophic   | 1982          |
| Donner Kiesgrube 3  | Managed   | recreational fisheries, regular stocking                                   | Anglers                                                   | Eutrophic     | 2000          |
| Kiesteich Brelingen | Managed   | recreational fisheries, regular stocking                                   | Anglers, dog walkers                                      | Mesotrophic   | 1999          |
| Kolshorner Teich    | Managed   | recreational fisheries, regular stocking                                   | Anglers, horses                                           | Mesotrophic   | 1980          |
| Linner See          | Managed   | recreational fisheries, regular stocking                                   | Anglers                                                   | Mesotrophic   | 2000          |
| Meitzer See         | Managed   | recreational fisheries, regular stocking                                   | Anglers, dog walkers, swimmers                            | Oligotrophic  | 2006          |
| Neumanns Kuhle      | Managed   | recreational fisheries, regular stocking                                   | Anglers, dog walkers                                      | Polytrophic   | 1970          |
| Plockhorst          | Managed   | recreational fisheries, regular stocking                                   | Anglers, dog walkers, horses                              | Eutrophic     | 1998          |
| Saalsdorf           | Managed   | recreational fisheries, regular stocking                                   | Anglers, dog walkers                                      | Mesotrophic   | 1995          |
| Schleptruper See    | Managed   | recreational fisheries, regular stocking                                   | Anglers, dog walkers                                      | Mesotrophic   | 1965          |
| Stedorfer Baggersee | Managed   | recreational fisheries, regular stocking                                   | Anglers, dog walkers                                      | Eutrophic     | 1983          |
| Steinwedeler Teich  | Managed   | recreational fisheries, regular stocking                                   | Anglers, dog walkers, cyclists                            | Mesotrophic   | 1978          |
| Wahle               | Managed   | recreational fisheries, regular stocking                                   | Anglers, dog walkers                                      | Mesotrophic   | 1990          |
| Weidekampsee        | Managed   | recreational fisheries, regular stocking                                   | Anglers                                                   | Mesotrophic   | 1994          |
| Wiesedermeer        | Managed   | recreational fisheries, regular stocking                                   | Anglers, dog walkers                                      | Mesotrophic   | 1990          |
| Bülstedt            | Unmanaged | Nature conservation                                                        | Birdwatchers                                              | Polytrophic   | 1991          |
| Lohmoor             | Unmanaged | Nature conservation                                                        | Birdwatchers                                              | Eutrophic     | 1991          |
| Goldbeck            | Unmanaged | Private (no management)                                                    | Owner/friends, horses, swimmers, anglers                  | Eutrophic     | 1992          |
| Handorf             | Unmanaged | Private (no management)                                                    | Horses, dogs (commercial)                                 | Eutrophic     | 2004          |
| Hänigsen            | Unmanaged | Private (no management)                                                    | Swimmers, dog walkers, anglers, campfires, dumping ground | Mesotrophic   | 2011          |
| Hopels              | Unmanaged | Angling club, not stocked or managed at time of assessment                 | Swimmers, dog walkers                                     | Mesotrophic   | 1998          |
| Pfütze              | Unmanaged | Private (no management)                                                    | Dog walkers, canoes, swimmers, cyclists                   | Mesotrophic   | 2000          |
| Schwicheldt         | Unmanaged | Private (no management)                                                    | Owner/hunter, dog walkers                                 | Mesotrophic   | 2007          |
| Heeßel              | Unmanaged | Business property (no management)                                          | No                                                        | Eutrophic     | 1963          |
| Xella               | Unmanaged | Business property; endangered crayfish ( <i>Astacus astacus</i> ) breeding | No (restricted access)                                    | Mesotrophic   | 1975          |



Table 2: Ranking of Red List categories used for calculation of conservation values.

| IUCN Red List category     | EU Directives                          | Red List categories of Germany and Lower Saxony | Rank <i>r</i> | Weight <i>c</i> |
|----------------------------|----------------------------------------|-------------------------------------------------|---------------|-----------------|
| EX – extinct               |                                        | 0 – extinct                                     | 5             | 32              |
| EW – extinct in the wild   |                                        |                                                 |               |                 |
| CR – critically endangered | Annex I (Birds)<br>Annex IV (Habitats) | 1 – critically endangered<br>2 – endangered     | 4             | 16              |
| EN – endangered            | Annex II (Habitats)                    | 3 – vulnerable<br>G – intermediate              | 3             | 8               |
| VU – vulnerable            |                                        | R – rare                                        | 2             | 4               |
| NT – near threatened       | Annex V (Habitats)                     | V – near threatened                             | 1             | 2               |
| LC – least concern         | Annex II and III                       | * – least concern                               | 0             | 1               |
| DD – data deficient        | (Birds)                                | -- data deficient                               |               |                 |

Table 3: Overview about unique species species of different taxa found at managed and unmanaged gravel pits in Lower Saxony, Germany. Full details of the species inventory are in Table S9.

| Taxon                 | Species number found only in ... |                    |                        | Sørensen index (similarity) | SER <sub>i</sub> index (dissimilarity) |
|-----------------------|----------------------------------|--------------------|------------------------|-----------------------------|----------------------------------------|
|                       | ...managed lakes                 | ...unmanaged lakes | ...one lake (any type) |                             |                                        |
| submerged macrophytes | 28                               | 9                  | 31                     | 0.48                        | 0.68                                   |
| riparian herbs        | 55                               | 27                 | 57                     | 0.73                        | 0.43                                   |
| riparian trees        | 6                                | 4                  | 8                      | 0.86                        | 0.25                                   |
| amphibians            | 0                                | 0                  | 0                      | 1.00                        | 0.00                                   |
| Odonata               | 5                                | 8                  | 7                      | 0.76                        | 0.38                                   |
| waterfowl             | 10                               | 5                  | 6                      | 0.69                        | 0.47                                   |
| songbirds             | 9                                | 4                  | 12                     | 0.74                        | 0.42                                   |

Table 4: Comparison of species richness and taxon-specific conservation values in managed and unmanaged gravel pit lakes.  
Statistical differences of Sidak-corrected p-values < 0.05 are **bolded**.

| Diversity measure  | Taxa                                  | mean $\pm$ standard deviation (range)   |                                       | test          | Statistics      |              |
|--------------------|---------------------------------------|-----------------------------------------|---------------------------------------|---------------|-----------------|--------------|
|                    |                                       | managed (N = 16)                        | unmanaged (N = 10)                    |               | statistic       | p-value      |
| species richness   | submerged macrophytes                 | 8.8 $\pm$ 4.4 (3-17)                    | 5.9 $\pm$ 4.3 (0-14)                  | t-test        | t = 1.63        | 0.710        |
|                    | riparian herbs                        | 41.8 $\pm$ 12.5 (15-57)                 | 50 $\pm$ 10.7 (30-64)                 | t-test        | t = -1.73       | 0.638        |
|                    | riparian trees                        | 12.8 $\pm$ 2.1 (9-17)                   | 12.6 $\pm$ 5.3 (3-24)                 | Welch-test    | t = 0.08        | 1.000        |
|                    | amphibians                            | 1.6 $\pm$ 0.5 (1-2)                     | 2.2 $\pm$ 0.8 (1-3)                   | U-test        | W = 43          | 0.299        |
|                    | amphibians reproducing                | 1 $\pm$ 0.6 (0-2)                       | 1.4 $\pm$ 0.8 (0-3)                   | U-test        | W = 59          | 0.922        |
|                    | Odonata                               | 7.9 $\pm$ 2.8 (2-12)                    | 9 $\pm$ 4.3 (4-18)                    | t-test        | t = -0.77       | 0.997        |
|                    | damselflies                           | 4.3 $\pm$ 1.3 (2-6)                     | 4.4 $\pm$ 1.3 (3-7)                   | t-test        | t = -0.29       | 1.000        |
|                    | dragonflies                           | 3.7 $\pm$ 2.1 (0-7)                     | 4.6 $\pm$ 3.4 (1-12)                  | t-test        | t = -0.84       | 0.995        |
|                    | songbirds                             | 9.2 $\pm$ 2.8 (5-14)                    | 11.3 $\pm$ 3 (7-17)                   | t-test        | t = -1.81       | 0.577        |
|                    | waterfowl                             | 9.5 $\pm$ 2.8 (3-13)                    | 9.1 $\pm$ 3.5 (2-13)                  | t-test        | t = 0.32        | 1.000        |
| threatened species | submerged macrophytes                 | 2.2 $\pm$ 1.8 (0-5)                     | 1.4 $\pm$ 1.6 (0-5)                   | U-test        | W = 100.5       | 0.949        |
|                    | riparian herbs                        | 1.6 $\pm$ 0.7 (0-3)                     | 2.2 $\pm$ 1 (1-4)                     | U-test        | W = 55.5        | 0.823        |
|                    | riparian trees                        | 0.6 $\pm$ 0.6 (0-2)                     | 0.2 $\pm$ 0.4 (0-1)                   | U-test        | W = 105         | 0.714        |
|                    | amphibians<br>(only when reproducing) | 0.2 $\pm$ 0.4 (0-2)                     | 0.5 $\pm$ 0.7 (0-2)                   | U-test        | W = 61.5        | 0.893        |
|                    | Odonata                               | 0.8 $\pm$ 0.8 (0-2)                     | 1.3 $\pm$ 1.2 (0-4)                   | U-test        | W = 61.5        | 0.967        |
|                    | damselflies                           | 0.3 $\pm$ 0.5 (0-1)                     | 0.1 $\pm$ 0.3 (0-1)                   | U-test        | W = 92          | 0.985        |
|                    | dragonflies                           | 0.6 $\pm$ 0.7 (0-2)                     | 1.2 $\pm$ 1.2 (0-4)                   | U-test        | W = 54.5        | 0.780        |
|                    | songbirds                             | 0.4 $\pm$ 0.5 (0-1)                     | 0.5 $\pm$ 0.5 (0-1)                   | U-test        | W = 70          | 0.999        |
|                    | waterfowl                             | 1.6 $\pm$ 1.3 (0-4)                     | 1.1 $\pm$ 1.1 (0-3)                   | U-test        | W = 98.5        | 0.969        |
| conservation value | submerged macrophytes                 | 5.6 $\pm$ 2.2 (1.2-10.9)                | 3.5 $\pm$ 1.9 (1-6.2)                 | t-test        | t = 2.38        | 0.232        |
|                    | riparian vegetation                   | 1.6 $\pm$ 0.4 (0.7-2.6)                 | 1.4 $\pm$ 0.2 (1-1.7)                 | t-test        | t = 1.72        | 0.643        |
|                    | riparian herbs                        | 1.7 $\pm$ 0.7 (0.3-3.4)                 | 1.4 $\pm$ 0.3 (0.8-1.8)               | Welch-test    | t = 1.48        | 0.812        |
|                    | riparian trees                        | 1.7 $\pm$ 0.3 (1-2.3)                   | 1.3 $\pm$ 0.4 (1-1.9)                 | U-test        | W = 122         | 0.245        |
|                    | <b>amphibians</b>                     | <b>1.3 <math>\pm</math> 0.3 (1-1.5)</b> | <b>1.6 <math>\pm</math> 0.3 (1-2)</b> | <b>U-test</b> | <b>W = 30.5</b> | <b>0.048</b> |
|                    | Odonata                               | 1.8 $\pm$ 0.8 (1-3.7)                   | 1.7 $\pm$ 1 (1-3.9)                   | U-test        | W = 91.5        | 1.000        |
|                    | damselflies                           | 1.4 $\pm$ 0.6 (1-2.8)                   | 1.2 $\pm$ 0.2 (1-1.7)                 | U-test        | W = 87          | 1.000        |
|                    | dragonflies                           | 2.1 $\pm$ 1.6 (1-6)                     | 2.3 $\pm$ 1.9 (1-6.5)                 | U-test        | W = 75          | 1.000        |
|                    | songbirds                             | 1.6 $\pm$ 0.5 (1-2.7)                   | 1.6 $\pm$ 0.2 (1.2-1.9)               | Welch-test    | t = 0.06        | 1.000        |
|                    | waterfowl                             | 3.1 $\pm$ 1.7 (1.1-6.6)                 | 2.7 $\pm$ 1.1 (1.2-3.9)               | t-test        | t = 0.68        | 0.999        |

Table 5: ANOVA results of forward selection of RDA models explaining species richness and conservation value (management not used as predictor variable). Variables are ordered by their  $R^2_{adj}$ -value. **Significant variables ( $p < 0.05$ ) are bolded**, *statistical trends ( $p < 0.1$ ) are italic*.

| Modelling step                                               | Variable                                  | Variance explained | $R^2_{adj}$  | F-statistic | p-value           |
|--------------------------------------------------------------|-------------------------------------------|--------------------|--------------|-------------|-------------------|
| full model<br>(without management)<br>for species richness   | <b>woody_habitat</b>                      | <b>0.96</b>        | <b>0.130</b> | <b>5.23</b> | <b>&lt; 0.001</b> |
|                                                              | <b>agricultural_extension</b>             | <b>0.52</b>        | <b>0.041</b> | <b>2.83</b> | <b>0.017</b>      |
|                                                              | <b>age</b>                                | <b>0.51</b>        | <b>0.039</b> | <b>2.77</b> | <b>0.020</b>      |
|                                                              | <b>lake_steepness</b>                     | <b>0.46</b>        | <b>0.038</b> | <b>2.49</b> | <b>0.031</b>      |
|                                                              | acidity                                   | 0.16               | 0.032        | 0.86        | 0.532             |
|                                                              | <b>vegetated_habitat</b>                  | <b>0.48</b>        | <b>0.030</b> | <b>2.63</b> | <b>0.025</b>      |
|                                                              | nitrogen                                  | 0.21               | 0.018        | 1.12        | 0.352             |
|                                                              | <i>lake_shallowness</i>                   | <i>0.39</i>        | <i>0.017</i> | <i>2.14</i> | <i>0.061</i>      |
|                                                              | conductivity                              | 0.31               | 0.017        | 1.67        | 0.140             |
|                                                              | <i>non_accessibility</i>                  | <i>0.38</i>        | <i>0.006</i> | <i>2.07</i> | <i>0.069</i>      |
|                                                              | trophic state                             | 0.19               | 0.005        | 1.06        | 0.396             |
|                                                              | general_recreational_use_intensity        | 0.30               | -0.011       | 1.64        | 0.156             |
|                                                              | wetland                                   | 0.04               | -0.011       | 0.20        | 0.980             |
|                                                              | distance_to_next_river                    | 0.16               | -0.016       | 0.88        | 0.523             |
|                                                              | rural                                     | 0.15               | -0.022       | 0.81        | 0.576             |
| best model<br>for species richness                           | <b>woody_habitat</b>                      | <b>1.16</b>        | <b>0.311</b> | <b>5.99</b> | <b>&lt; 0.001</b> |
|                                                              | <b>agricultural_extension</b>             | <b>0.69</b>        |              | <b>3.59</b> | <b>0.003</b>      |
|                                                              | <b>lake_steepness</b>                     | <b>0.60</b>        |              | <b>3.11</b> | <b>0.008</b>      |
|                                                              | <b>vegetated_habitat</b>                  | <b>0.50</b>        |              | <b>2.60</b> | <b>0.021</b>      |
| full model<br>(without management)<br>for conservation value | <i>woody_habitat</i>                      | <i>0.60</i>        | <i>0.040</i> | <i>2.14</i> | <i>0.063</i>      |
|                                                              | general_recreational_use_intensity        | 0.19               | 0.039        | 0.67        | 0.683             |
|                                                              | forest_extension                          | 0.33               | 0.029        | 1.19        | 0.323             |
|                                                              | lake_shallowness                          | 0.45               | 0.026        | 1.60        | 0.163             |
|                                                              | non_accessibility                         | 0.43               | 0.022        | 1.54        | 0.180             |
|                                                              | nitrogen                                  | 0.20               | 0.015        | 0.71        | 0.627             |
|                                                              | distance_to_next_river                    | 0.43               | 0.013        | 1.54        | 0.180             |
|                                                              | age                                       | 0.22               | 0.007        | 0.77        | 0.605             |
|                                                              | acidity                                   | 0.32               | 0.003        | 1.16        | 0.335             |
|                                                              | agricultural_extension                    | 0.35               | -0.001       | 1.24        | 0.297             |
|                                                              | vegetated_habitat                         | 0.21               | -0.012       | 0.75        | 0.623             |
|                                                              | conductivity                              | 0.26               | -0.013       | 0.91        | 0.479             |
|                                                              | rural                                     | 0.27               | -0.014       | 0.97        | 0.452             |
|                                                              | trophic_state                             | 0.09               | -0.017       | 0.32        | 0.926             |
|                                                              | wetland                                   | 0.06               | -0.026       | 0.20        | 0.979             |
|                                                              | lake_steepness                            | 0.03               | -0.037       | 0.12        | 0.996             |
| best model<br>for conservation value                         | <b>woody_habitat</b>                      | <b>0.55</b>        | <b>0.083</b> | <b>2.14</b> | <b>0.047</b>      |
|                                                              | <b>general_recreational_use_intensity</b> | <b>0.54</b>        |              | <b>2.12</b> | <b>0.049</b>      |

Table 6: ANOVA results of forward selection of RDA models explaining species richness and conservation value (management included as predictor variable). Variables are ordered by their  $R^2_{adj}$ -value. **Significant variables ( $p < 0.05$ ) are bolded**, *statistical trends ( $p < 0.1$ ) are italic*.

| Modelling step                    | Variable                                  | Variance explained | $R^2_{adj}$   | F-statistic | p-value           |
|-----------------------------------|-------------------------------------------|--------------------|---------------|-------------|-------------------|
| full model for species richness   | <b>woody_habitat</b>                      | <b>0.85</b>        | <b>0.130</b>  | <b>4.90</b> | <b>0.001</b>      |
|                                   | <b>management</b>                         | <b>0.57</b>        | <b>0.043</b>  | <b>3.26</b> | <b>0.009</b>      |
|                                   | <b>agricultural_extension</b>             | <b>0.40</b>        | <b>0.041</b>  | <b>2.31</b> | <b>0.044</b>      |
|                                   | <i>age</i>                                | <i>0.40</i>        | <i>0.039</i>  | <i>2.31</i> | <i>0.050</i>      |
|                                   | <b>lake_steepness</b>                     | <b>0.42</b>        | <b>0.038</b>  | <b>2.43</b> | <b>0.036</b>      |
|                                   | acidity                                   | 0.16               | 0.032         | 0.92        | 0.488             |
|                                   | <i>vegetated_habitat</i>                  | <i>0.39</i>        | <i>0.030</i>  | <i>2.24</i> | <i>0.055</i>      |
|                                   | nitrogen                                  | 0.28               | 0.018         | 1.59        | 0.165             |
|                                   | <i>lake_shallowness</i>                   | <i>0.37</i>        | <i>0.017</i>  | <i>2.13</i> | <i>0.067</i>      |
|                                   | <i>conductivity</i>                       | <i>0.34</i>        | <i>0.017</i>  | <i>1.96</i> | <i>0.092</i>      |
|                                   | <i>non_accessibility</i>                  | <i>0.38</i>        | <i>0.006</i>  | <i>2.17</i> | <i>0.062</i>      |
|                                   | trophic state                             | 0.20               | 0.005         | 1.13        | 0.357             |
|                                   | <i>general_recreational_use_intensity</i> | <i>0.38</i>        | <i>-0.011</i> | <i>2.17</i> | <i>0.059</i>      |
|                                   | wetland                                   | 0.05               | -0.011        | 0.30        | 0.943             |
|                                   | distance_to_next_river                    | 0.08               | -0.016        | 0.46        | 0.843             |
|                                   | rural                                     | 0.18               | -0.022        | 1.03        | 0.414             |
|                                   | forest_extension                          | 0.15               | -0.027        | 0.86        | 0.528             |
| best model for species richness   | <b>woody_habitat</b>                      | <b>1.16</b>        | <b>0.311</b>  | <b>5.99</b> | <b>&lt; 0.001</b> |
|                                   | <b>agricultural_extension</b>             | <b>0.69</b>        |               | <b>3.59</b> | <b>0.002</b>      |
|                                   | <b>lake_steepness</b>                     | <b>0.60</b>        |               | <b>3.11</b> | <b>0.006</b>      |
|                                   | <b>vegetated_habitat</b>                  | <b>0.50</b>        |               | <b>2.60</b> | <b>0.019</b>      |
| full model for conservation value | <b>management</b>                         | <b>0.73</b>        | <b>0.068</b>  | <b>2.75</b> | <b>0.018</b>      |
|                                   | woody_habitat                             | 0.37               | 0.040         | 1.38        | 0.240             |
|                                   | general_recreational_use_intensity        | 0.47               | 0.039         | 1.75        | 0.121             |
|                                   | forest_extension                          | 0.36               | 0.029         | 1.34        | 0.255             |
|                                   | lake_shallowness                          | 0.43               | 0.026         | 1.61        | 0.163             |
|                                   | non_accessibility                         | 0.42               | 0.022         | 1.56        | 0.177             |
|                                   | nitrogen                                  | 0.14               | 0.015         | 0.52        | 0.787             |
|                                   | distance_to_next_river                    | 0.35               | 0.013         | 1.32        | 0.260             |
|                                   | age                                       | 0.19               | 0.007         | 0.73        | 0.630             |
|                                   | acidity                                   | 0.30               | 0.003         | 1.14        | 0.361             |
|                                   | agricultural_extension                    | 0.22               | -0.001        | 0.84        | 0.556             |
|                                   | vegetated_habitat                         | 0.11               | -0.012        | 0.43        | 0.867             |
|                                   | conductivity                              | 0.28               | -0.013        | 1.05        | 0.403             |
|                                   | rural                                     | 0.30               | -0.014        | 1.11        | 0.366             |
|                                   | trophic_state                             | 0.09               | -0.017        | 0.33        | 0.918             |
|                                   | wetland                                   | 0.05               | -0.026        | 0.19        | 0.982             |
|                                   | lake_steepness                            | 0.03               | -0.037        | 0.10        | 0.998             |
| best model for conservation value | <b>management</b>                         | <b>0.73</b>        | <b>0.068</b>  | <b>2.83</b> | <b>0.008</b>      |

## Figure legends

Figure 1: Map of study area in Lower Saxony (Germany).

Figure 2: Habitat assessment plot, modified after Kaufmann & Whittier (1997) and Newbrey et al. (2005).

Figure 3: Principal component analysis (PCA) by category of environmental variables visualized for (a) morphology, (b) land use, (c) habitat structure, and (d) recreational use intensity. Percentages in brackets show the proportional variance explained by each axis. See Tables S7, S8 for details on PCA-results. The abbreviations used are shown in Tables S5, S6. Numbers reflect the different lakes (Table 1). The centroids of management types are plotted as supplementary variables that did not influence the ordination. The 95% confidence-level around centroids are plotted to visualize differences between lake types. Differences are highly significant when confidence levels do not overlap.

Figure 4: Principal component analysis (PCA) of species richness plotted for the first two axes. Percentages in brackets show the proportional variance explained by each axis. Names of selected explanatory variables are shown in Tables S5, S6. Numbers reflect the different lakes (Table 1). The centroids of management types and the explanatory variables from redundancy analysis (RDA, slashed purple lines) are plotted as supplementary variables to not influence the ordination. The 95% confidence-level around centroids are plotted to visualize differences between lake types.

Figure 5: Principal component analysis (PCA) of conservation value plotted for the first two axes. Percentages in brackets show the proportional variance explained by each axis. Names of selected explanatory variables are shown in Tables S5, S6. Numbers reflect the different lakes, see Table 1. The centroids of management types and the explanatory variables from redundancy analysis (RDA, slashed purple lines) are plotted as supplementary variables to not influence the ordination. The 95% confidence-level around centroids are plotted to visualize differences between lake types.

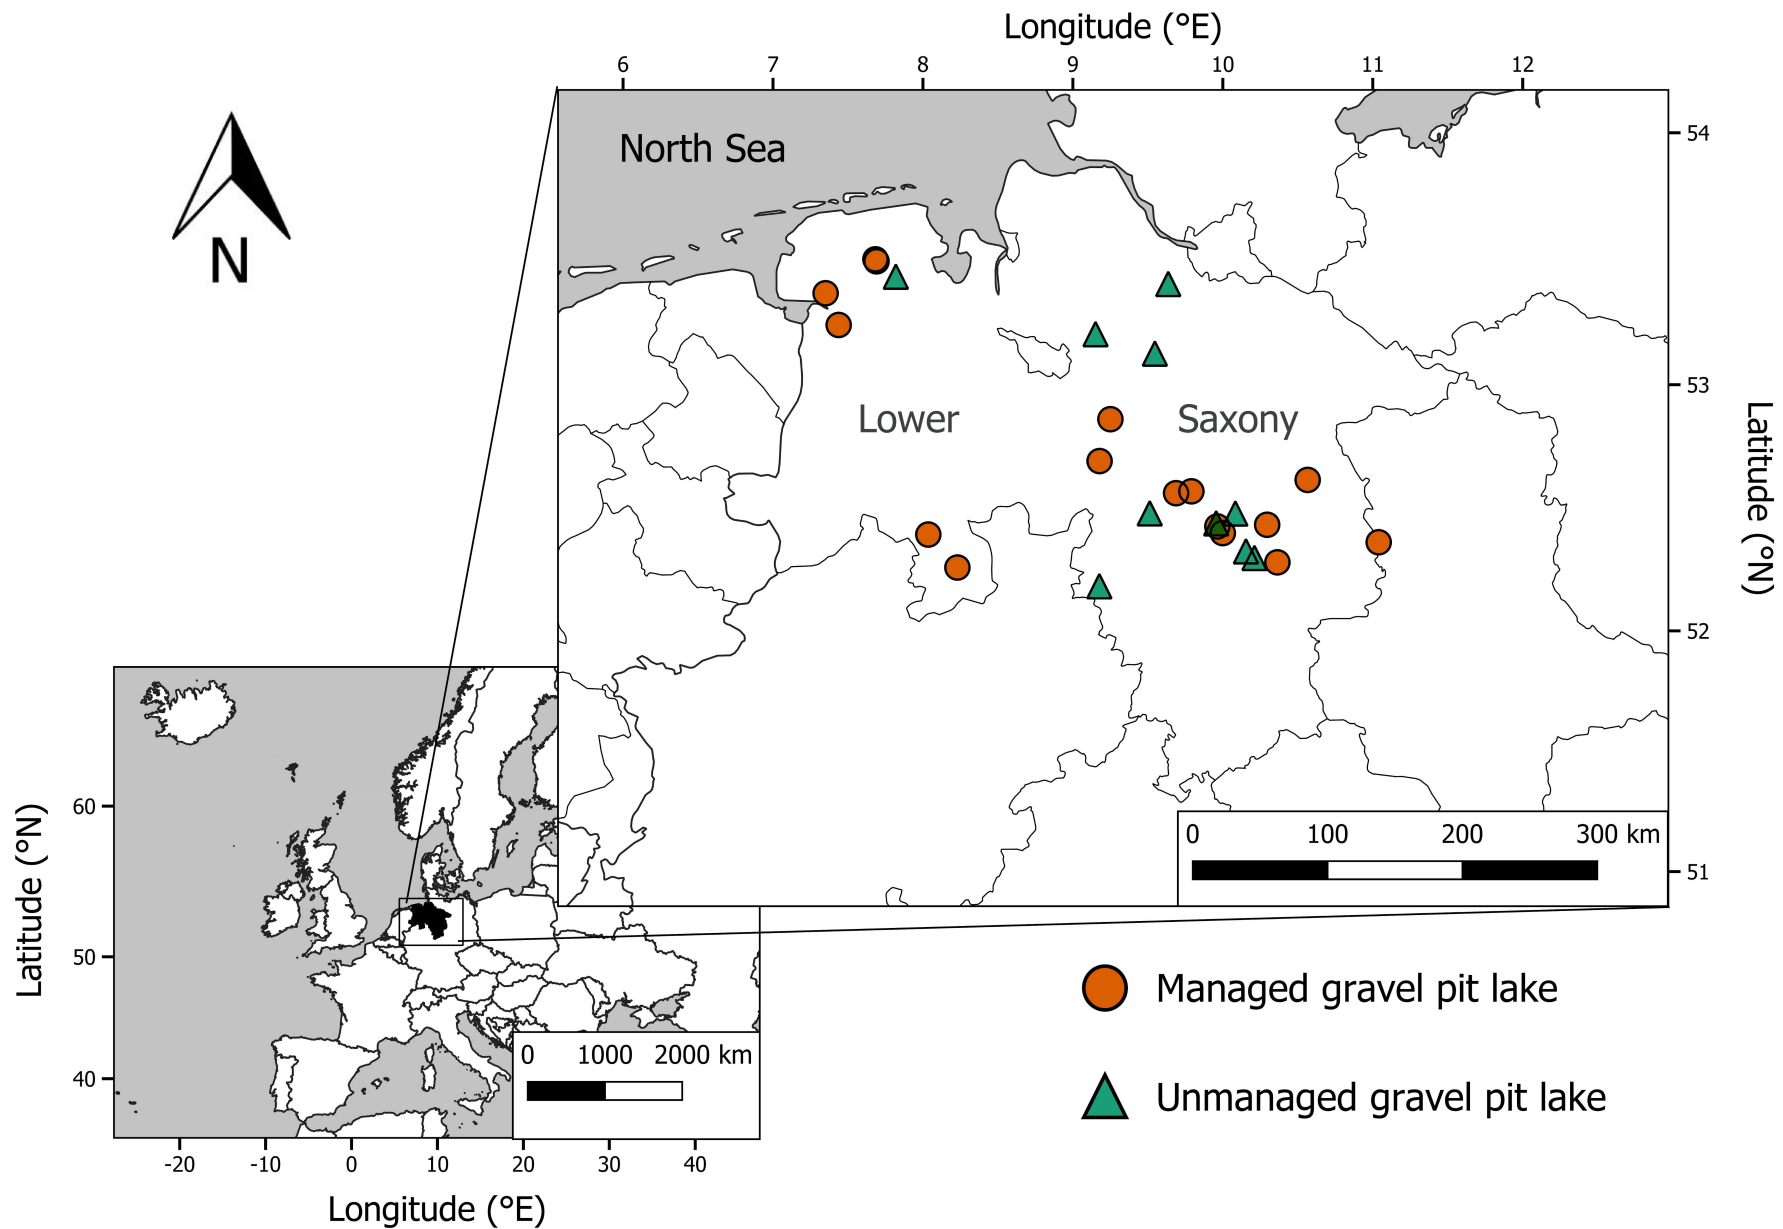

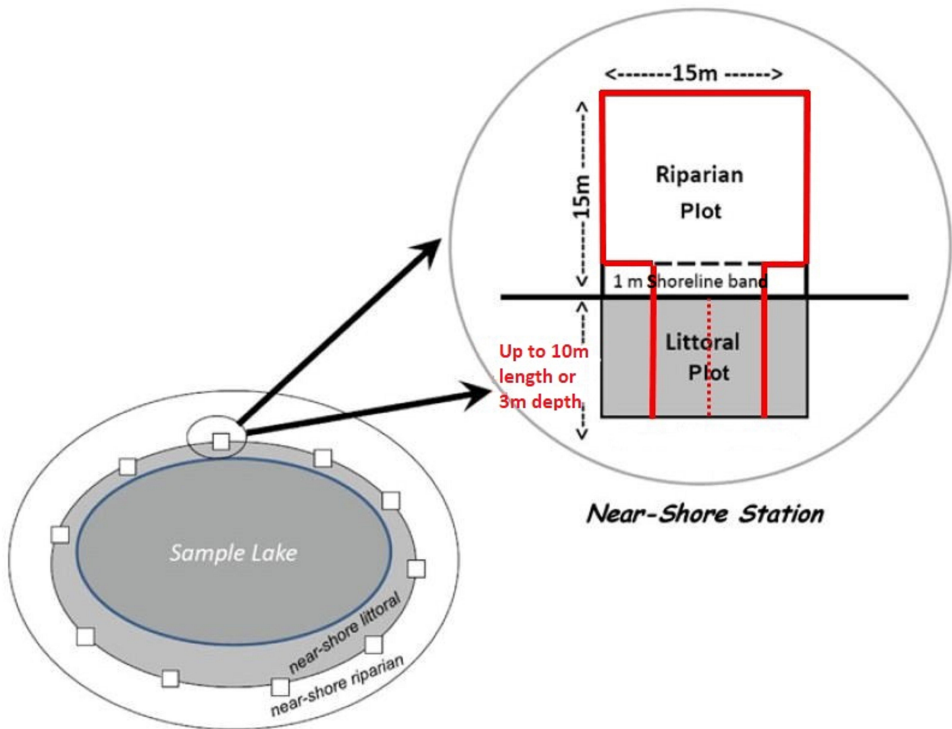

**a) Morphology**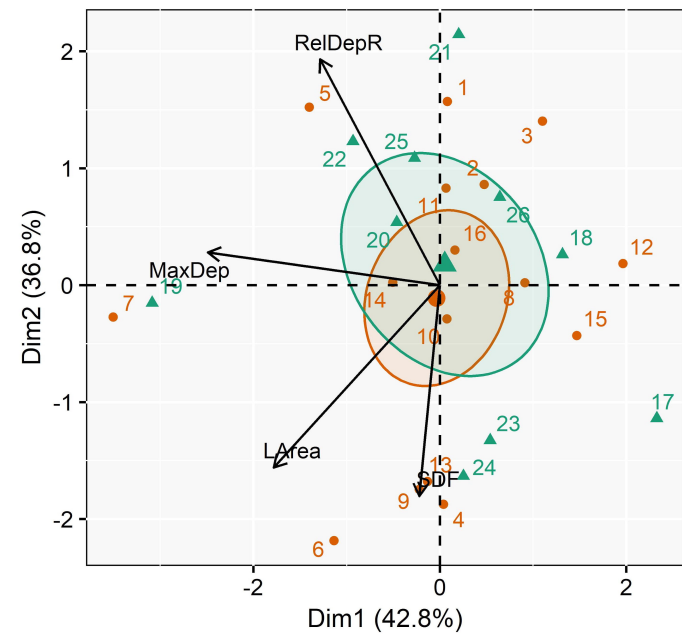**b) Land use**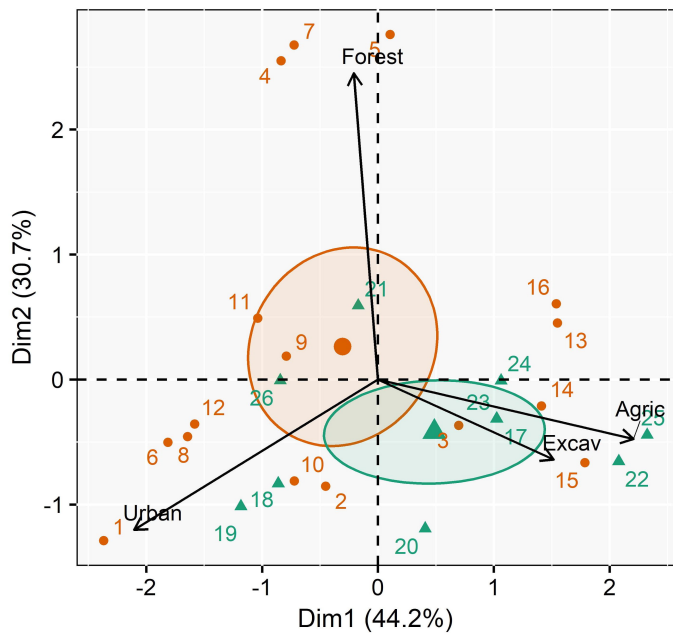**c) Habitat structure**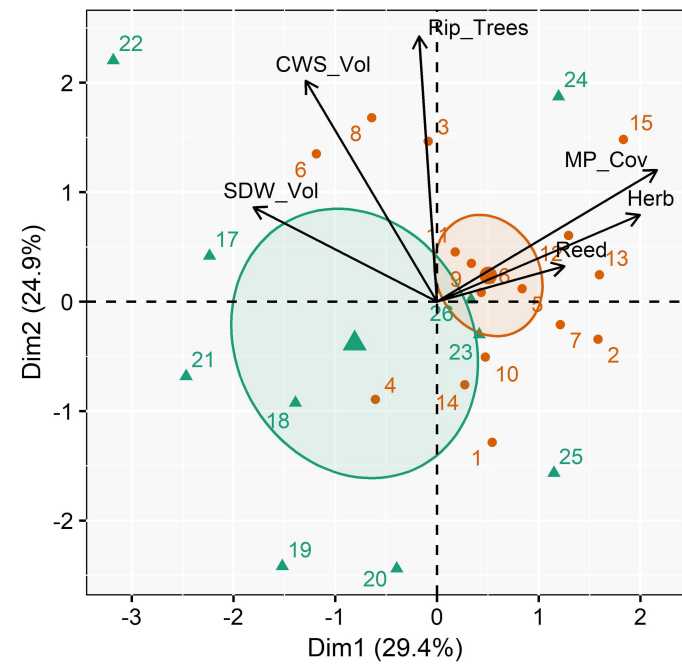**d) Recreational use**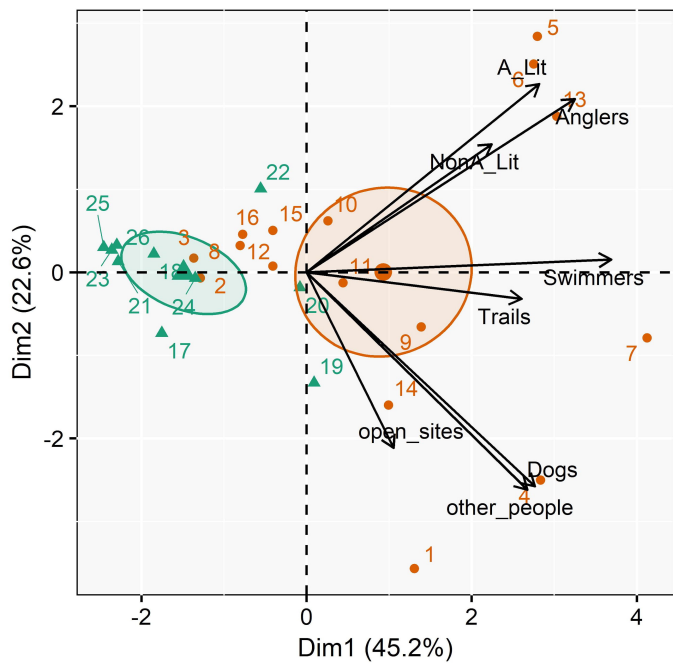

management:  managed  unmanaged



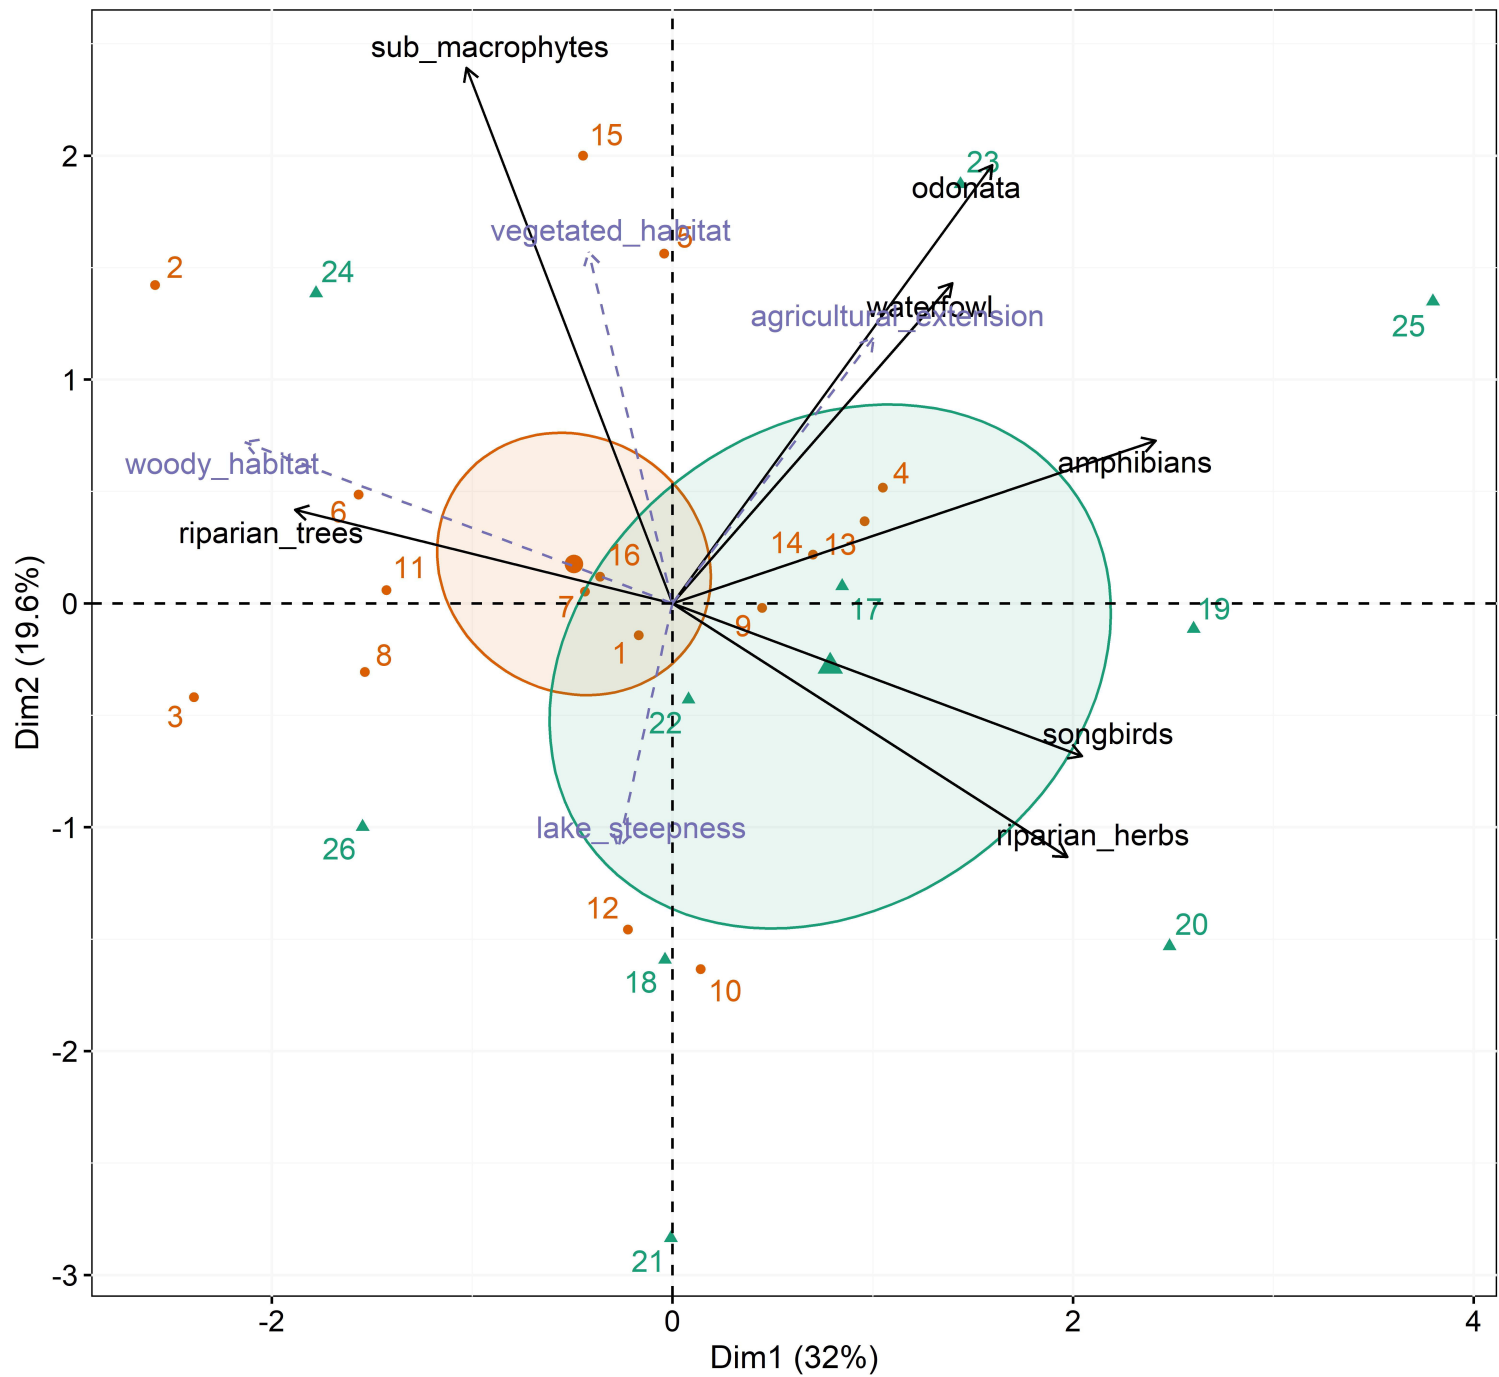

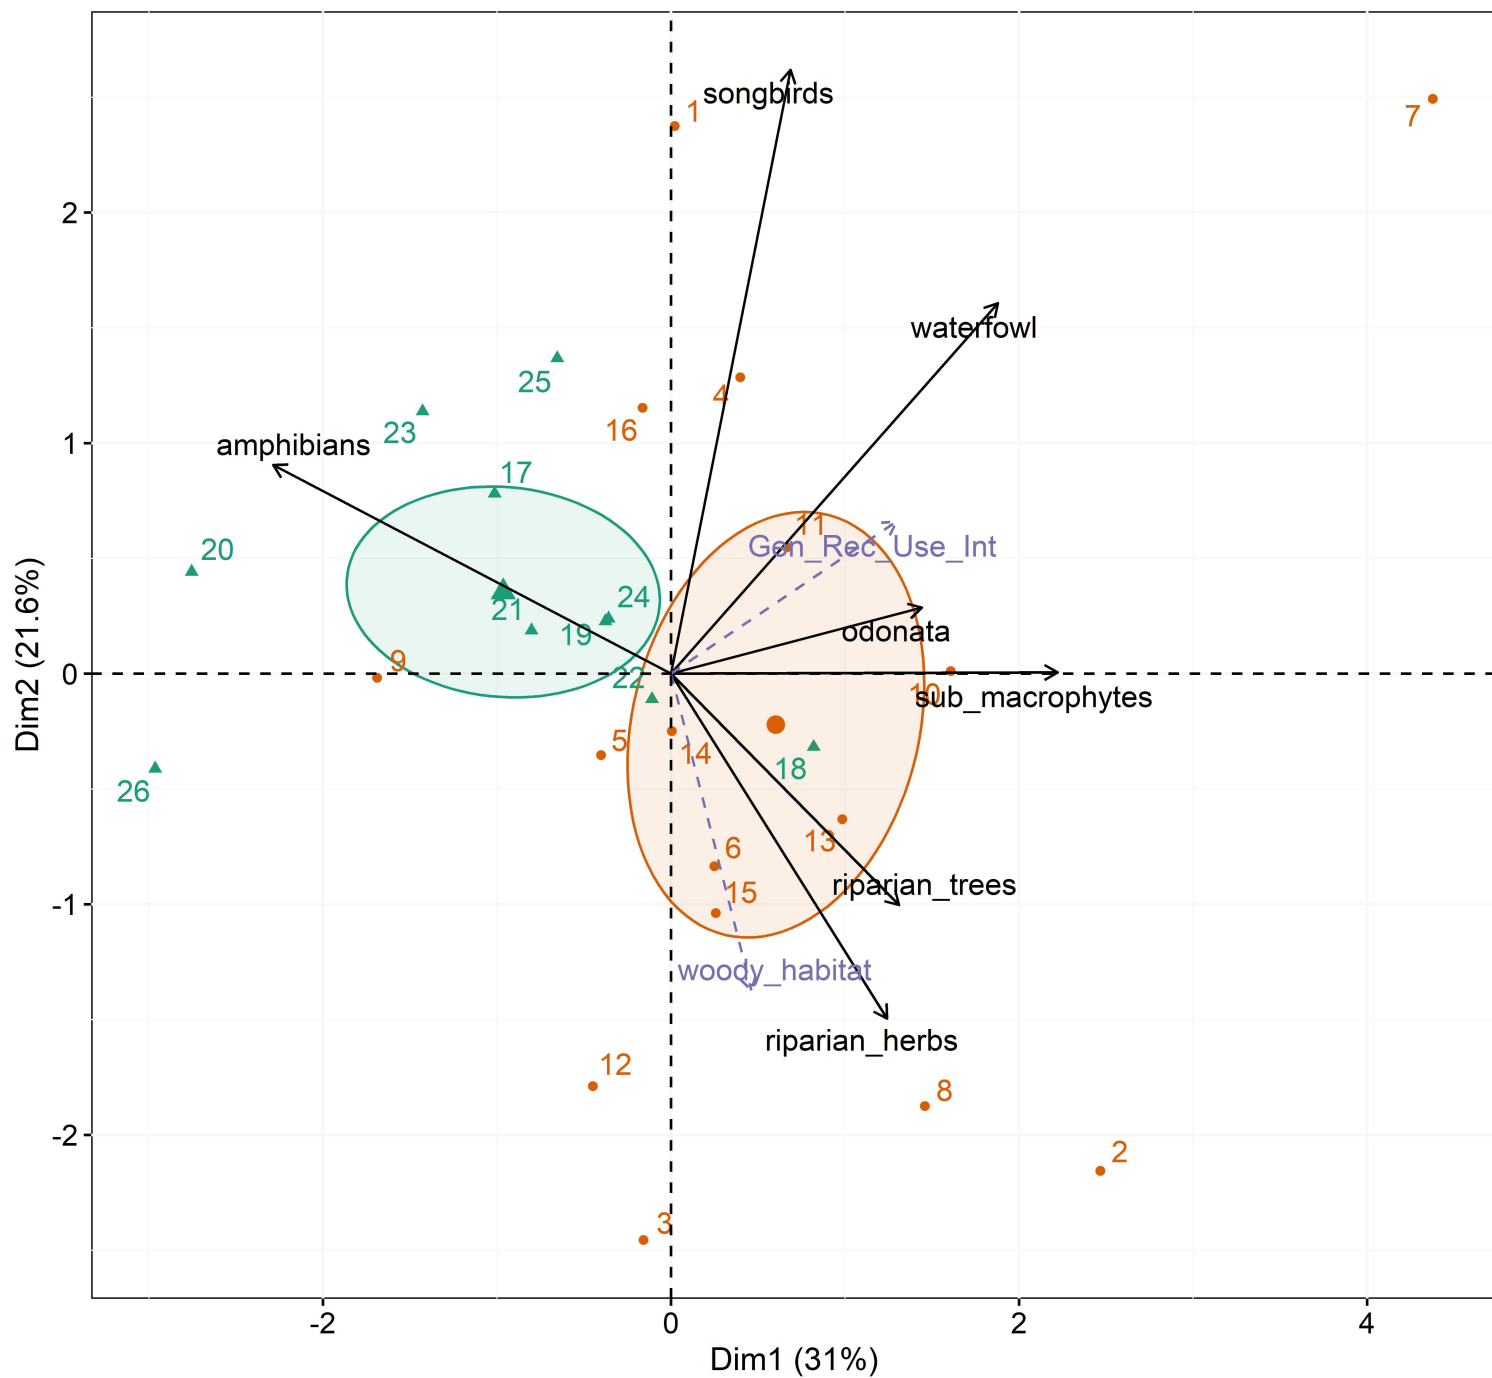

Source: https://www.biorxiv.org/content/10.1101/667493v2.full.pdf
