# Supplementary material for: Status of aquatic and riparian biodiversity in artificial lake ecosystems with and without management for recreational fisheries: implications for conservation
Source: bioRxiv or medRxiv preprint supplement (doi:10.1101/667493), 2020-07-07
Supplement: Supplementary file [file media-1.pdf]

## Supplementary Information

Table S1: Lake characteristics (Morphology and Trophic state)

| Lake name           | Maximum depth in m (MaxDep) | Lake area in ha (LArea) | Shoreline development factor (SDF) | Relative depth ratio (RelDepR) | Total phosphorus in µg/l (TP) | Total organic carbon in mg/l (TOC) | Mean chlorophyll a in µg/l (ChLa) | Secchi depth in m (Secchi) | Ammonium in µg/l (NH4) | Nitrate in µg/l (NO3) |
|---------------------|-----------------------------|-------------------------|------------------------------------|--------------------------------|-------------------------------|------------------------------------|-----------------------------------|----------------------------|------------------------|-----------------------|
| Chodhemster Kolk    | 10.1                        | 3.2                     | 1.1                                | 0.05                           | 20                            | 8.5                                | 4.3                               | 1.4                        | 50                     | 5                     |
| Collrunge           | 8.6                         | 4.3                     | 1.1                                | 0.04                           | 15                            | 5.1                                | 4.6                               | 2.8                        | 40                     | 50                    |
| Donner Kiesgrube 3  | 5.2                         | 1.0                     | 1.2                                | 0.05                           | 27                            | 6.4                                | 8.9                               | 2.5                        | 15                     | 5                     |
| Kiesteich Brelingen | 8.7                         | 8.5                     | 2.2                                | 0.03                           | 17                            | 4.2                                | 6.5                               | 1.2                        | 50                     | 780                   |
| Kolshorner Teich    | 16.1                        | 4.3                     | 1.5                                | 0.07                           | 17                            | 4.6                                | 4.8                               | 5.5                        | 15                     | 5                     |
| Linner See          | 11.2                        | 17.7                    | 1.8                                | 0.02                           | 18                            | 6.6                                | 7.4                               | 4.0                        | 15                     | 5                     |
| Meitzer See         | 23.5                        | 19.5                    | 1.3                                | 0.05                           | 8                             | 6.3                                | 2.1                               | 4.5                        | 15                     | 100                   |
| Neumanns Kuhle      | 6.2                         | 6.9                     | 1.1                                | 0.02                           | 160                           | 13.0                               | 65.3                              | 0.5                        | 15                     | 5                     |
| Plockhorst          | 8.2                         | 14.3                    | 1.7                                | 0.02                           | 34                            | 6.9                                | 30.7                              | 0.5                        | 120                    | 790                   |
| Saalsdorf           | 9.2                         | 9.0                     | 1.3                                | 0.03                           | 14                            | 7.0                                | 15.3                              | 1.3                        | 240                    | 860                   |
| Schleptruper See    | 10.1                        | 4.0                     | 1.3                                | 0.04                           | 9                             | 5.2                                | 3.7                               | 4.7                        | 15                     | 40                    |
| Stedorfer Baggersee | 2.8                         | 1.9                     | 1.2                                | 0.02                           | 23                            | 11.8                               | 10.2                              | 0.9                        | 40                     | 5                     |
| Steinwedeler Teich  | 9.1                         | 10.4                    | 2.0                                | 0.03                           | 10                            | 2.5                                | 5.8                               | 3.0                        | 40                     | 120                   |
| Wahle               | 12.1                        | 8.1                     | 1.4                                | 0.04                           | 10                            | 3.4                                | 7.2                               | 3.2                        | 210                    | 1040                  |
| Weidekampsee        | 4.3                         | 2.9                     | 1.6                                | 0.02                           | 10                            | 5.4                                | 3                                 | 2.8                        | 15                     | 5                     |
| Wiesedermeer        | 9.2                         | 2.9                     | 1.7                                | 0.05                           | 19                            | 8.2                                | 6.7                               | 2.1                        | 15                     | 5                     |
| Bülstedt            | 1.1                         | 2.4                     | 1.6                                | 0.01                           | 25                            | 6.7                                | 90.6                              | 1.6                        | 30                     | 2940                  |
| Goldbeck            | 5.0                         | 2.3                     | 1.4                                | 0.03                           | 19                            | 2.9                                | 19.2                              | 2.3                        | 70                     | 770                   |
| Handorf             | 23.0                        | 13.6                    | 1.7                                | 0.06                           | 58                            | 4.9                                | 29.2                              | 1.6                        | 15                     | 310                   |
| Hänigsen            | 12.3                        | 6.2                     | 1.4                                | 0.04                           | 16                            | 5.5                                | 9.8                               | 2.7                        | 50                     | 2040                  |
| Heeßel              | 7.4                         | 0.9                     | 1.3                                | 0.07                           | 29                            | 6.2                                | 12.6                              | 1.7                        | 15                     | 380                   |
| Hopels              | 14.5                        | 5.5                     | 1.3                                | 0.05                           | 12                            | 5.6                                | 4.8                               | 4.5                        | 50                     | 140                   |
| Lohmoor             | 7.4                         | 4.1                     | 2.2                                | 0.03                           | 72                            | 12.4                               | 27.6                              | 0.9                        | 15                     | 5                     |
| Pfütze              | 7.3                         | 10.6                    | 1.8                                | 0.02                           | 13                            | 3.8                                | 5.7                               | 1.9                        | 15                     | 5                     |
| Schwicheldt         | 10.0                        | 1.7                     | 1.8                                | 0.07                           | 16                            | 5.5                                | 2.6                               | 2.6                        | 30                     | 90                    |
| Xella               | 7.3                         | 2.1                     | 1.5                                | 0.04                           | 12                            | 6.2                                | 9.8                               | 0.5                        | 550                    | 650                   |
| <b>Mean ± SD</b>    | <b>9.6 ± 5.2</b>            | <b>6.5 ± 5.2</b>        | <b>1.5 ± 0.3</b>                   | <b>0.04 ± 0.02</b>             | <b>26.3 ± 30.4</b>            | <b>6.3 ± 2.6</b>                   | <b>15.3 ± 20</b>                  | <b>2.4 ± 1.4</b>           | <b>67.3 ± 111.8</b>    | <b>428 ± 690</b>      |

Table S2: Lake characteristics (Trophic state and Habitat structure)

| Lake name           | Conductivity<br>in mS/m<br>(Con) | pH value<br>(pH) | Volume-%<br>of simple<br>dead wood<br>(SDW_Vol) | Volume-%<br>of coarse<br>woody<br>structure<br>(CWS_Vol) | Mean riparian<br>tree coverage<br>from 0 to 4<br>(Rip_Trees) | Mean<br>riparian reed<br>coverage<br>from 0 to 4<br>(Reed) | Mean riparian<br>herb coverage<br>from 0 to 4<br>(Herb) | Litoral<br>macrophyte<br>coverage<br>in %<br>(MP_Cov) | Lake age in<br>years by<br>2017<br>(Age) |
|---------------------|----------------------------------|------------------|-------------------------------------------------|----------------------------------------------------------|--------------------------------------------------------------|------------------------------------------------------------|---------------------------------------------------------|-------------------------------------------------------|------------------------------------------|
| Chodhemster Kolk    | 2.1                              | 6.7              | 0.015                                           | < 0.1                                                    | 0.4                                                          | 0.2                                                        | 3                                                       | 22.4                                                  | 46                                       |
| Collrunge           | 2                                | 7.9              | 0.003                                           | 0.4                                                      | 0.8                                                          | 2.4                                                        | 1.3                                                     | 67.9                                                  | 35                                       |
| Donner Kiesgrube 3  | 6.3                              | 7.8              | 0.002                                           | 2.1                                                      | 1.5                                                          | 0                                                          | 1.7                                                     | 38.5                                                  | 17                                       |
| Kiesteich Brelingen | 3                                | 7.5              | 0.006                                           | 1.4                                                      | 0.8                                                          | 0.1                                                        | 1.7                                                     | 12.5                                                  | 18                                       |
| Kolshorner Teich    | 5.5                              | 7.6              | 0.001                                           | 1.1                                                      | 1                                                            | 1.3                                                        | 1.8                                                     | 37.9                                                  | 37                                       |
| Linner See          | 3                                | 8.5              | 0.035                                           | 1.5                                                      | 1.2                                                          | 1.3                                                        | 1.6                                                     | 35.8                                                  | 17                                       |
| Meitzer See         | 6.2                              | 7.9              | 0.003                                           | 0.8                                                      | 0.9                                                          | 2.5                                                        | 1.8                                                     | 33.6                                                  | 11                                       |
| Neumanns Kuhle      | 5.9                              | 8.6              | 0.002                                           | 5.6                                                      | 1.1                                                          | 0.5                                                        | 1.7                                                     | 34.9                                                  | 47                                       |
| Plockhorst          | 3.4                              | 8                | 0.002                                           | 1                                                        | 1.2                                                          | 1.5                                                        | 1.5                                                     | 27.6                                                  | 19                                       |
| Saalsdorf           | 5.7                              | 9                | 0.004                                           | 1.2                                                      | 0.8                                                          | 2.3                                                        | 1.6                                                     | 19.5                                                  | 22                                       |
| Schleptruper See    | 5                                | 8.2              | 0.004                                           | 2                                                        | 1.1                                                          | 2                                                          | 1.7                                                     | 17.4                                                  | 52                                       |
| Stedorfer Baggersee | 3.5                              | 7.5              | 0.001                                           | 0.3                                                      | 1.2                                                          | 0.3                                                        | 2.1                                                     | 59.8                                                  | 34                                       |
| Steinwedeler Teich  | 7.4                              | 7.5              | 0.001                                           | 0.8                                                      | 1                                                            | 2                                                          | 2                                                       | 49.2                                                  | 39                                       |
| Wahle               | 7.3                              | 7.6              | < 0.001                                         | 0.3                                                      | 1                                                            | 0.9                                                        | 1.4                                                     | 26.6                                                  | 27                                       |
| Weidekampsee        | 4.6                              | 8                | < 0.001                                         | 3.2                                                      | 1                                                            | 2.2                                                        | 1.9                                                     | 82.3                                                  | 23                                       |
| Wiesedermeer        | 1.4                              | 8                | 0.001                                           | 1.9                                                      | 0.9                                                          | 0.9                                                        | 1.1                                                     | 62.5                                                  | 27                                       |
| Bülstedt            | 2.9                              | 7.6              | 0.023                                           | 1.6                                                      | 1.2                                                          | 1.7                                                        | 0.2                                                     | 7.6                                                   | 26                                       |
| Goldbeck            | 2.9                              | 7.9              | 0.005                                           | 0.7                                                      | 1                                                            | 0.3                                                        | 0.7                                                     | 2.5                                                   | 25                                       |
| Handorf             | 6.7                              | 9.2              | 0.002                                           | 0.2                                                      | 0.6                                                          | 0                                                          | 0.1                                                     | 8.3                                                   | 13                                       |
| Hänigsen            | 4.4                              | 8.6              | 0.001                                           | 0.6                                                      | 0.4                                                          | 1.7                                                        | 0.6                                                     | 9                                                     | 6                                        |
| Heeßel              | 5.4                              | 8.2              | 0.007                                           | 3.7                                                      | 0.8                                                          | 0                                                          | 0.4                                                     | 0                                                     | 54                                       |
| Hopels              | 2.2                              | 7.7              | 0.028                                           | 6.2                                                      | 1.2                                                          | 0.8                                                        | 0.9                                                     | 8.2                                                   | 19                                       |
| Lohmoor             | 1.6                              | 8.2              | 0.007                                           | 0.1                                                      | 1                                                            | 0.9                                                        | 1.9                                                     | 29                                                    | 26                                       |
| Pfütze              | 3.4                              | 7.7              | 0.001                                           | 3.4                                                      | 1.2                                                          | 0.8                                                        | 1.8                                                     | 85.2                                                  | 17                                       |
| Schwicheldt         | 9                                | 8.4              | 0.001                                           | < 0.1                                                    | 0.5                                                          | 0.7                                                        | 1.7                                                     | 52.9                                                  | 10                                       |
| Xella               | 9.6                              | 7.5              | 0.001                                           | 0.9                                                      | 1.2                                                          | 1.7                                                        | 1.8                                                     | 8.5                                                   | 42                                       |
| <b>Mean ± SD</b>    | <b>4.6 ± 2.2</b>                 | <b>2.4 ± 1.4</b> | <b>0.006 ± 0.009</b>                            | <b>1.6 ± 1.6</b>                                         | <b>1 ± 0.3</b>                                               | <b>1.1 ± 0.8</b>                                           | <b>1.5 ± 0.6</b>                                        | <b>32.3 ± 23.8</b>                                    | <b>27.3 ± 13.3</b>                       |

Table S3: Lake characteristics (Landuse, Water and Human Influence)

| Lake name           | Excavation<br>in 100m-<br>buffer in %<br>(Excav) | Agriculture<br>in 100m-<br>buffer in %<br>(Agric) | Forest in<br>100m-buffer<br>in %<br>(Forest) | Wetland in<br>100m-<br>buffer in %<br>(Wetland) | Water<br>surface in<br>100m-<br>buffer in %<br>(Water) | Distance<br>to next<br>lake in m<br>(DistLake) | Distance to<br>next river<br>in m<br>(DistRiver) | Distance to<br>next chanel in<br>m<br>(DistChannel) | Distance to<br>next road<br>in m<br>(DistRoad) | Urban area<br>in 100m-<br>buffer in %<br>(Urban) |
|---------------------|--------------------------------------------------|---------------------------------------------------|----------------------------------------------|-------------------------------------------------|--------------------------------------------------------|------------------------------------------------|--------------------------------------------------|-----------------------------------------------------|------------------------------------------------|--------------------------------------------------|
| Chodhemster Kolk    | 0                                                | 2.4                                               | 0                                            | 0                                               | 9.4                                                    | 40                                             | 1170                                             | 1                                                   | 135                                            | 87.5                                             |
| Collrunge           | 0                                                | 34.7                                              | 0                                            | 0                                               | 1.6                                                    | 170                                            | 29900                                            | 410                                                 | 20                                             | 43.5                                             |
| Donner Kiesgrube 3  | 13.2                                             | 21.4                                              | 0                                            | 0                                               | 50.4                                                   | 5                                              | 350                                              | 150                                                 | 550                                            | 0                                                |
| Kiesteich Brelingen | 0                                                | 2.7                                               | 66.3                                         | 0                                               | 8.6                                                    | 240                                            | 7540                                             | 1210                                                | 70                                             | 11.2                                             |
| Kolshorner Teich    | 3                                                | 22.8                                              | 72.6                                         | 0                                               | 1.6                                                    | 75                                             | 1850                                             | 350                                                 | 630                                            | 0                                                |
| Linner See          | 0                                                | 4.9                                               | 11.2                                         | 0                                               | 6.9                                                    | 20                                             | 25                                               | 20                                                  | 75                                             | 64.4                                             |
| Meitzer See         | 0                                                | 4.3                                               | 68.4                                         | 0                                               | 15                                                     | 40                                             | 425                                              | 1630                                                | 50                                             | 8                                                |
| Neumanns Kuhle      | 0                                                | 3.2                                               | 8.4                                          | 14.4                                            | 0.9                                                    | 850                                            | 4800                                             | 1                                                   | 40                                             | 55.1                                             |
| Plockhorst          | 0                                                | 14.5                                              | 17.2                                         | 0                                               | 19.2                                                   | 40                                             | 1130                                             | 275                                                 | 15                                             | 30.6                                             |
| Saalsdorf           | 0                                                | 35.5                                              | 5.9                                          | 0                                               | 2.7                                                    | 80                                             | 1470                                             | 30                                                  | 520                                            | 55.9                                             |
| Schleptruper See    | 0                                                | 8.3                                               | 24.3                                         | 0                                               | 2                                                      | 180                                            | 500                                              | 1                                                   | 40                                             | 32.6                                             |
| Stedorfer Baggersee | 0                                                | 6.5                                               | 11.9                                         | 0                                               | 2.2                                                    | 5                                              | 1320                                             | 30                                                  | 1010                                           | 56.1                                             |
| Steinwedeler Teich  | 11.6                                             | 55.9                                              | 25.9                                         | 0                                               | 1.7                                                    | 185                                            | 38                                               | 360                                                 | 20                                             | 0                                                |
| Wahle               | 15.3                                             | 44                                                | 9.1                                          | 0                                               | 14.4                                                   | 30                                             | 710                                              | 250                                                 | 35                                             | 0                                                |
| Weidekampsee        | 21.3                                             | 47.7                                              | 1.7                                          | 0                                               | 15.9                                                   | 55                                             | 2600                                             | 30                                                  | 365                                            | 0                                                |
| Wiesedermeer        | 11.7                                             | 55.8                                              | 29.7                                         | 0                                               | 2.9                                                    | 610                                            | 29790                                            | 250                                                 | 670                                            | 0                                                |
| Bülstedt            | 0                                                | 52                                                | 0                                            | 4.3                                             | 8                                                      | 40                                             | 820                                              | 1180                                                | 640                                            | 0                                                |
| Goldbeck            | 14                                               | 6.6                                               | 5.6                                          | 0                                               | 13.1                                                   | 15                                             | 555                                              | 110                                                 | 150                                            | 51                                               |
| Handorf             | 1.1                                              | 20.2                                              | 0                                            | 0                                               | 6.1                                                    | 30                                             | 770                                              | 465                                                 | 230                                            | 59.5                                             |
| Hänigsen            | 32.2                                             | 18.3                                              | 5.5                                          | 0                                               | 0.5                                                    | 1280                                           | 560                                              | 305                                                 | 35                                             | 43.5                                             |
| Heeßel              | 1.3                                              | 10.2                                              | 15.4                                         | 0                                               | 14                                                     | 10                                             | 820                                              | 65                                                  | 30                                             | 0                                                |
| Hopels              | 6.5                                              | 79                                                | 0                                            | 1.6                                             | 2.1                                                    | 330                                            | 31920                                            | 5                                                   | 1530                                           | 0                                                |
| Lohmoor             | 0                                                | 51.9                                              | 0                                            | 45.1                                            | 1.7                                                    | 830                                            | 220                                              | 15                                                  | 1150                                           | 0                                                |
| Pfütze              | 0                                                | 54                                                | 8                                            | 0                                               | 30.1                                                   | 45                                             | 480                                              | 40                                                  | 445                                            | 0                                                |
| Schwicheldt         | 39                                               | 42                                                | 15.5                                         | 0                                               | 3.6                                                    | 60                                             | 3050                                             | 15                                                  | 975                                            | 0                                                |
| Xella               | 0                                                | 3.5                                               | 6.3                                          | 0                                               | 8                                                      | 1                                              | 800                                              | 45                                                  | 395                                            | 20.1                                             |
| <b>Mean ± SD</b>    | <b>6.5 ± 10.4</b>                                | <b>27 ± 22</b>                                    | <b>15.7 ± 21</b>                             | <b>2.5 ± 9</b>                                  | <b>9.3 ± 10.8</b>                                      | <b>202.5 ± 319.1</b>                           | <b>4754.4 ± 9452.5</b>                           | <b>278.6 ± 414.7</b>                                | <b>377.9 ± 409.1</b>                           | <b>23.8 ± 27</b>                                 |

Table S4: Lake characteristics (Human Influence and Recreational Intensity)

| Lake name           | Distance to next village or city in m (DistVille) | Distance to next city in m (DistCity) | Garbage related to angling in No./m shore (A_Garb) | Garbage not related to angling in No./m shore (NonA_Garb) | Angling-sites and open spaces in % of shoreline (open_sites) | Trails and paths per shoreline in m/m (trails) | Anglers per visit (anglers) | Dog walker and dogs per visit (dogs) | swimming people per visit (swimmers) | other people per visit (other_people) |
|---------------------|---------------------------------------------------|---------------------------------------|----------------------------------------------------|-----------------------------------------------------------|--------------------------------------------------------------|------------------------------------------------|-----------------------------|--------------------------------------|--------------------------------------|---------------------------------------|
| Chodhemster Kolk    | 170                                               | 170                                   | 0.02                                               | 0.1                                                       | 87.7                                                         | 1                                              | 0                           | 3.6                                  | 2.2                                  | 6.6                                   |
| Collrunge           | 20                                                | 9000                                  | 0                                                  | < 0.1                                                     | 6.3                                                          | 0.8                                            | 0.5                         | 0.5                                  | 0.7                                  | 0.8                                   |
| Donner Kiesgrube 3  | 600                                               | 3650                                  | 0                                                  | 0.3                                                       | 3.6                                                          | 1                                              | 0                           | 0                                    | 0                                    | 0.3                                   |
| Kiesteich Brelingen | 150                                               | 10500                                 | 0.03                                               | 1                                                         | 17.2                                                         | 0.8                                            | 1.3                         | 5.2                                  | 4.2                                  | 11.9                                  |
| Kolshorner Teich    | 460                                               | 4180                                  | 0.19                                               | 1                                                         | 16.4                                                         | 1                                              | 4.2                         | 0                                    | 4.4                                  | 1.4                                   |
| Linner See          | 380                                               | 7630                                  | 0.10                                               | 1.5                                                       | 14.3                                                         | 1                                              | 5.1                         | 0.6                                  | 6                                    | 0.6                                   |
| Meitzer See         | 1160                                              | 8580                                  | 0.06                                               | 0.8                                                       | 8.5                                                          | 1                                              | 3.1                         | 6                                    | 10                                   | 5.5                                   |
| Neumanns Kuhle      | 1400                                              | 7470                                  | 0.01                                               | 0.5                                                       | 5.5                                                          | 1                                              | 0.6                         | 0.4                                  | 0.7                                  | 0.6                                   |
| Plockhorst          | 180                                               | 11180                                 | 0.04                                               | 1.2                                                       | 16.4                                                         | 1                                              | 1                           | 2.4                                  | 2.4                                  | 5.7                                   |
| Saalsdorf           | 825                                               | 13060                                 | 0.06                                               | 0.6                                                       | 18                                                           | 1                                              | 1.2                         | 0.6                                  | 1.9                                  | 1                                     |
| Schleptruper See    | 200                                               | 1540                                  | 0.02                                               | 0.3                                                       | 17.2                                                         | 1.1                                            | 1.7                         | 1.6                                  | 2.5                                  | 1.9                                   |
| Stedorfer Baggersee | 240                                               | 5240                                  | 0.04                                               | 0.4                                                       | 27.4                                                         | 1.1                                            | 0.5                         | 0.4                                  | 0.7                                  | 0.4                                   |
| Steinwedeler Teich  | 775                                               | 1230                                  | 0.13                                               | 1.5                                                       | 17.1                                                         | 0.8                                            | 4.2                         | 1.6                                  | 5.3                                  | 3                                     |
| Wahle               | 320                                               | 8000                                  | 0                                                  | 0.4                                                       | 25.8                                                         | 1                                              | 1.2                         | 3.5                                  | 3                                    | 4.5                                   |
| Weidekampsee        | 225                                               | 13130                                 | 0.01                                               | 1.5                                                       | 6.1                                                          | 0.8                                            | 0.3                         | 0.5                                  | 0.6                                  | 1.7                                   |
| Wiesedermeer        | 960                                               | 9600                                  | 0.04                                               | 0.2                                                       | 8.1                                                          | 0.6                                            | 0.8                         | 0.7                                  | 1.4                                  | 0.4                                   |
| Bülstedt            | 240                                               | 11700                                 | 0                                                  | 0                                                         | 4.9                                                          | 0.2                                            | 0.3                         | 0                                    | 0.3                                  | 0.3                                   |
| Goldbeck            | 300                                               | 5960                                  | 0.02                                               | < 0.1                                                     | 7.8                                                          | 0.2                                            | 0                           | 0                                    | 0.8                                  | 0.5                                   |
| Handorf             | 150                                               | 1070                                  | 0                                                  | 0.1                                                       | 4.6                                                          | 0.9                                            | 0                           | 3.3                                  | 3.1                                  | 3.4                                   |
| Hänigsen            | 60                                                | 4880                                  | 0                                                  | 0.5                                                       | 4.6                                                          | 1.4                                            | 0.8                         | 0                                    | 1                                    | 3.8                                   |
| Heeßel              | 710                                               | 2080                                  | 0                                                  | 0                                                         | 7                                                            | 0.2                                            | 0                           | 0                                    | 0                                    | 0                                     |
| Hopels              | 1400                                              | 15110                                 | 0                                                  | 2.3                                                       | 0.8                                                          | 0.6                                            | 0                           | 0.7                                  | 0.4                                  | 0.4                                   |
| Lohmoor             | 1810                                              | 7180                                  | 0                                                  | < 0.1                                                     | 1.1                                                          | 0.1                                            | 0                           | 0                                    | 0                                    | 0.1                                   |
| Pfütze              | 440                                               | 5300                                  | 0                                                  | 0.4                                                       | 6                                                            | 0.5                                            | 0                           | 0.9                                  | 1.1                                  | 0.7                                   |
| Schwicheldt         | 1150                                              | 2010                                  | 0                                                  | 0                                                         | 0                                                            | 0                                              | 0                           | 0                                    | 0                                    | 0                                     |
| Xella               | 1750                                              | 3300                                  | 0                                                  | 0.1                                                       | 3                                                            | 0                                              | 0.2                         | 0                                    | 0.2                                  | 0                                     |
| <b>Mean ± SD</b>    | <b>618.3 ± 523.1</b>                              | <b>6644.2 ± 4122.9</b>                | <b>0.03 ± 0.05</b>                                 | <b>0.6 ± 0.6</b>                                          | <b>14.6 ± 17.9</b>                                           | <b>0.7 ± 0.4</b>                               | <b>1 ± 1.4</b>              | <b>1.2 ± 1.7</b>                     | <b>2 ± 2.3</b>                       | <b>2.1 ± 2.8</b>                      |

Table S5: PCA-axes and their interpretation for environmental variables.  
 Only the first four axes are shown. Other axes had eigenvalues < 1.

| Characteristic                | Variable                                     | Dim 1             | Dim 2          | Dim 3        | Dim 4      |
|-------------------------------|----------------------------------------------|-------------------|----------------|--------------|------------|
| <b>Morphology</b>             | <i>Eigenvalue</i>                            | 1.71              | 1.47           | 0.75         | 0.07       |
|                               | <i>Proportion of explained variance in %</i> | 43                | 37             | 19           | 2          |
|                               | <i>MaxDep</i>                                | -0.75             | 0.09           | -0.03        | -0.66      |
|                               | <i>LArea</i>                                 | -0.54             | -0.51          | -0.39        | 0.56       |
|                               | <i>SDF</i>                                   | -0.07             | -0.59          | 0.81         | -0.04      |
|                               | <i>RelDepR</i>                               | -0.39             | 0.63           | 0.45         | 0.51       |
|                               | <i>Interpretation of axes</i>                | lake shallowness  | lake steepness | (not used)   | (not used) |
|                               | <i>Eigenvalue</i>                            | 2.65              | 1.69           | 1.32         | 1.15       |
|                               | <i>Proportion of explained variance in %</i> | 33                | 21             | 16           | 14         |
|                               | <b>Trophic state</b>                         | <i>TP</i>         | 0.53           | -0.14        | 0.27       |
| <i>TOC</i>                    |                                              | 0.47              | -0.23          | 0.13         | 0.33       |
| <i>CHLa</i>                   |                                              | 0.50              | 0.18           | -0.29        | -0.24      |
| <i>Secchi</i>                 |                                              | -0.43             | -0.26          | -0.01        | -0.40      |
| <i>NH4</i>                    |                                              | -0.05             | 0.62           | 0.20         | 0.37       |
| <i>NO3</i>                    |                                              | 0.13              | 0.49           | -0.54        | -0.32      |
| <i>Con</i>                    |                                              | -0.11             | 0.44           | 0.58         | -0.15      |
| <i>pH</i>                     |                                              | 0.21              | 0.00           | 0.40         | -0.64      |
| <i>Interpretation of axes</i> |                                              | trophic state     | nitrogen       | conductivity | acidity    |
| <b>Habitat structure</b>      |                                              | <i>Eigenvalue</i> | 1.76           | 1.50         | 0.95       |
|                               | <i>Proportion of explained variance in %</i> | 29                | 25             | 16           | 13         |
|                               | <i>SDW_Vol</i>                               | -0.46             | 0.24           | -0.37        | 0.62       |
|                               | <i>CWS_Vol</i>                               | -0.33             | 0.56           | 0.18         | -0.31      |
|                               | <i>Rip_Trees</i>                             | -0.04             | 0.68           | -0.04        | -0.08      |
|                               | <i>Reed</i>                                  | 0.32              | 0.09           | -0.88        | -0.24      |
|                               | <i>Herb</i>                                  | 0.51              | 0.22           | 0.14         | 0.66       |
|                               | <i>MP_Cov</i>                                | 0.56              | 0.34           | 0.18         | -0.14      |
|                               | <i>Interpretation of axes</i>                | vegetated habitat | woody habitat  | (not used)   | (not used) |

Table S6: PCA-axes and their interpretation for environmental variables.

Only the first four axes are shown. Other axes had eigenvalues < 1.

| Characteristic                                 | Variable                                         | Dim 1                                    | Dim 2                     | Dim 3      | Dim 4      |
|------------------------------------------------|--------------------------------------------------|------------------------------------------|---------------------------|------------|------------|
| <b>Land use<br/>(in 100 m<br/>around lake)</b> | <i>Eigenvalue</i>                                | 1.45                                     | 0.87                      | 0.69       |            |
|                                                | <i>Proportion of explained<br/>variance in %</i> | 48                                       | 29                        | 23         |            |
|                                                | <i>Excav</i>                                     | 0.55                                     | -0.69                     | -0.48      |            |
|                                                | <i>Agric</i>                                     | 0.64                                     | -0.02                     | 0.77       |            |
|                                                | <i>Forest</i>                                    | -0.54                                    | -0.73                     | 0.43       |            |
|                                                | <i>Interpretation of axes</i>                    | agriculture                              | (not used)                | (not used) | (not used) |
| <b>Water</b>                                   | <i>Eigenvalue</i>                                | 1.82                                     | 1.15                      | 0.96       | 0.65       |
|                                                | <i>Proportion of explained<br/>variance in %</i> | 36                                       | 23                        | 19         | 13         |
|                                                | <i>Wetland</i>                                   | 0.50                                     | -0.52                     | 0.23       | 0.24       |
|                                                | <i>Water</i>                                     | -0.51                                    | -0.33                     | -0.05      | 0.78       |
|                                                | <i>DistLake</i>                                  | 0.63                                     | -0.08                     | 0.15       | 0.24       |
|                                                | <i>DistRiver</i>                                 | 0.28                                     | 0.71                      | -0.29      | 0.51       |
|                                                | <i>DistChanel</i>                                | -0.17                                    | 0.34                      | 0.92       | 0.11       |
|                                                | <i>Interpretation of axes</i>                    | wetland                                  | distance to<br>next river | (not used) | (not used) |
| <b>Human<br/>influence</b>                     | <i>Eigenvalue</i>                                | 1.86                                     | 0.95                      | 0.71       | 0.48       |
|                                                | <i>Proportion of explained<br/>variance in %</i> | 47                                       | 24                        | 18         | 12         |
|                                                | <i>Urban</i>                                     | -0.50                                    | 0.02                      | -0.86      | 0.08       |
|                                                | <i>DistRoad</i>                                  | 0.59                                     | -0.05                     | -0.41      | -0.69      |
|                                                | <i>DistHuman</i>                                 | 0.54                                     | -0.46                     | -0.27      | 0.65       |
|                                                | <i>DistCity</i>                                  | 0.33                                     | 0.89                      | -0.14      | 0.30       |
|                                                | <i>Interpretation of axes</i>                    | rural                                    | (not used)                | (not used) | (not used) |
| <b>Recreational<br/>use</b>                    | <i>Eigenvalue</i>                                | 3.61                                     | 1.81                      | 0.93       | 0.79       |
|                                                | <i>Proportion of explained<br/>variance in %</i> | 45                                       | 23                        | 12         | 10         |
|                                                | <i>A_Garb</i>                                    | 0.36                                     | 0.41                      | -0.35      | 0.10       |
|                                                | <i>NonA_Garb</i>                                 | 0.29                                     | 0.28                      | 0.42       | -0.46      |
|                                                | <i>open_sites</i>                                | 0.14                                     | -0.39                     | -0.76      | -0.23      |
|                                                | <i>Trails</i>                                    | 0.34                                     | -0.06                     | -0.01      | -0.69      |
|                                                | <i>Anglers</i>                                   | 0.42                                     | 0.38                      | -0.17      | 0.19       |
|                                                | <i>Dogs</i>                                      | 0.36                                     | -0.47                     | 0.24       | 0.26       |
|                                                | <i>Swimmers</i>                                  | 0.48                                     | 0.03                      | 0.06       | 0.39       |
|                                                | <i>other_people</i>                              | 0.35                                     | -0.48                     | 0.20       | 0.00       |
|                                                | <i>Interpretation of axes</i>                    | general<br>recreational<br>use intensity | non-<br>accessibility     | (not used) | (not used) |

Table S7: Species list and frequency of occurrence (%) for all species. Taxa are in order: macrophytes, amphibians, odonata, waterfowl, songbirds, riparian trees, and riparian herbs. Species within taxa are ordered by frequency of occurrence. Background color indicates the highest threat status on any used list (international red list IUCN, Annex of EU directives, national red list Germany, regional red list Lower Saxony, see Table 2): **Neobiota are highlighted in green**

|                                   |                                                        | EX EW 0                 | CR 1 2 | EN 3 G                      | VU R | NT V                          | LC DD * - |
|-----------------------------------|--------------------------------------------------------|-------------------------|--------|-----------------------------|------|-------------------------------|-----------|
| Taxon                             | Species                                                | in all lakes (N=26) [%] |        | in managed lakes (N=16) [%] |      | in unmanaged lakes (N=10) [%] |           |
| submerged macrophytes             | <i>Phragmites australis</i>                            | 69                      | 69     | 70                          |      |                               |           |
|                                   | <i>Potamogeton crispus</i>                             | 54                      | 69     | 30                          |      |                               |           |
|                                   | <i>Elodea nuttallii</i>                                | 46                      | 63     | 20                          |      |                               |           |
|                                   | <i>Potamogeton berchtoldii</i>                         | 42                      | 56     | 20                          |      |                               |           |
|                                   | <i>Myriophyllum spicatum</i>                           | 42                      | 50     | 30                          |      |                               |           |
|                                   | <i>Elodea callitrichoides</i>                          | 35                      | 50     | 10                          |      |                               |           |
|                                   | <i>Potamogeton pectinatus</i>                          | 31                      | 50     | 0                           |      |                               |           |
|                                   | <i>Elodea canadensis</i>                               | 31                      | 25     | 40                          |      |                               |           |
|                                   | <i>Nymphaea spec.</i>                                  | 23                      | 31     | 10                          |      |                               |           |
|                                   | <i>Nitella flexilis</i>                                | 23                      | 25     | 20                          |      |                               |           |
|                                   | <i>Juncus subnodulosus</i>                             | 23                      | 19     | 30                          |      |                               |           |
|                                   | <i>Typha latifolia</i>                                 | 23                      | 19     | 30                          |      |                               |           |
|                                   | <i>Ceratophyllum demersum</i>                          | 19                      | 19     | 20                          |      |                               |           |
|                                   | <i>Juncus bulbosus</i>                                 | 19                      | 19     | 20                          |      |                               |           |
|                                   | <i>Chara vulgaris</i>                                  | 15                      | 19     | 10                          |      |                               |           |
|                                   | <i>Ranunculus aquatilis</i>                            | 12                      | 19     | 0                           |      |                               |           |
|                                   | <i>Persicaria amphibia</i>                             | 12                      | 13     | 10                          |      |                               |           |
|                                   | <i>Potamogeton natans</i>                              | 12                      | 6      | 20                          |      |                               |           |
|                                   | <i>Chara connivens</i>                                 | 8                       | 13     | 0                           |      |                               |           |
|                                   | <i>Chara virgata</i>                                   | 8                       | 13     | 0                           |      |                               |           |
|                                   | <i>Potamogeton lucens</i>                              | 8                       | 13     | 0                           |      |                               |           |
|                                   | <i>Ranunculus circinatus</i>                           | 8                       | 13     | 0                           |      |                               |           |
|                                   | <i>Ranunculus peltatus</i>                             | 8                       | 13     | 0                           |      |                               |           |
|                                   | <i>Sparganium emersum</i>                              | 8                       | 13     | 0                           |      |                               |           |
|                                   | <i>Zannichellia palustris</i><br><i>ssp. palustris</i> | 8                       | 13     | 0                           |      |                               |           |
|                                   | <i>Chara denudata</i>                                  | 8                       | 6      | 10                          |      |                               |           |
|                                   | <i>Typha angustifolia</i>                              | 8                       | 6      | 10                          |      |                               |           |
|                                   | <i>Utricularia australis</i>                           | 8                       | 6      | 10                          |      |                               |           |
|                                   | <i>Potamogeton trichoides</i>                          | 8                       | 0      | 20                          |      |                               |           |
|                                   | <i>Alisma plantago-aquatica</i>                        | 4                       | 6      | 0                           |      |                               |           |
|                                   | <i>Chara contraria</i>                                 | 4                       | 6      | 0                           |      |                               |           |
|                                   | <i>Calliergonella cuspidata</i>                        | 4                       | 6      | 0                           |      |                               |           |
| <i>Chara globularis</i>           | 4                                                      | 6                       | 0      |                             |      |                               |           |
| <i>Chara tenuispina</i>           | 4                                                      | 6                       | 0      |                             |      |                               |           |
| <i>Eleocharis acicularis</i>      | 4                                                      | 6                       | 0      |                             |      |                               |           |
| <i>Equisetum palustre</i>         | 4                                                      | 6                       | 0      |                             |      |                               |           |
| <i>Hippuris vulgaris</i>          | 4                                                      | 6                       | 0      |                             |      |                               |           |
| <i>Myriophyllum verticillatum</i> | 4                                                      | 6                       | 0      |                             |      |                               |           |

|                                      |                                        |                      |                      |                       |
|--------------------------------------|----------------------------------------|----------------------|----------------------|-----------------------|
| submerged macrophytes                | <i>Najas marina</i> ssp. <i>marina</i> | 4                    | 6                    | 0                     |
|                                      | <i>Nitella confervacea</i>             | 4                    | 6                    | 0                     |
|                                      | <i>Nitella hyalina</i>                 | 4                    | 6                    | 0                     |
|                                      | <i>Nitella opaca</i>                   | 4                    | 6                    | 0                     |
|                                      | <i>Potamogeton compressus</i>          | 4                    | 6                    | 0                     |
|                                      | <i>Potamogeton nodosus</i>             | 4                    | 6                    | 0                     |
|                                      | <i>Potamogeton pusillus</i>            | 4                    | 6                    | 0                     |
|                                      | <i>Sagittaria sagittifolia</i>         | 4                    | 6                    | 0                     |
|                                      | <i>Samolus valerandi</i>               | 4                    | 6                    | 0                     |
|                                      | <i>Stratiotes aloides</i>              | 4                    | 6                    | 0                     |
|                                      | <i>Alisma gramineum</i>                | 4                    | 0                    | 10                    |
|                                      | <i>Alopecurus aequalis</i>             | 4                    | 0                    | 10                    |
|                                      | <i>Carex spec.</i>                     | 4                    | 0                    | 10                    |
|                                      | <i>Ceratophyllum submersum</i>         | 4                    | 0                    | 10                    |
|                                      | <i>Chara intermedia</i>                | 4                    | 0                    | 10                    |
|                                      | <i>Eleocharis palustris</i>            | 4                    | 0                    | 10                    |
|                                      | <i>Equisetum fluviatile</i>            | 4                    | 0                    | 10                    |
|                                      | <i>Isoëtes lacustris</i>               | 4                    | 0                    | 10                    |
|                                      | <i>Juncus articulatus</i>              | 4                    | 0                    | 10                    |
|                                      | <i>Juncus effusus</i>                  | 4                    | 0                    | 10                    |
|                                      | <i>Potamogeton coloratus</i>           | 4                    | 0                    | 10                    |
|                                      | <i>Ranunculus penicilatus</i>          | 4                    | 0                    | 10                    |
|                                      | amphibians                             | <i>Bufo bufo</i>     | 92 (85) <sup>1</sup> | 100 (81) <sup>1</sup> |
| <i>Pelophylax spec.</i> <sup>2</sup> |                                        | 58 (8) <sup>1</sup>  | 44 (6) <sup>1</sup>  | 80 (10) <sup>1</sup>  |
| <i>Rana temporaria</i>               |                                        | 23 (23) <sup>1</sup> | 13 (13) <sup>1</sup> | 40 (40) <sup>1</sup>  |
| odonata                              | <i>Ischnura elegans</i>                | 100                  | 100                  | 100                   |
|                                      | <i>Orthetrum cancellatum</i>           | 85                   | 88                   | 80                    |
|                                      | <i>Enallagma cyathigerum</i>           | 81                   | 88                   | 70                    |
|                                      | <i>Platycnemis pennipes</i>            | 65                   | 75                   | 50                    |
|                                      | <i>Coenagrion puella</i>               | 58                   | 50                   | 70                    |
|                                      | <i>Crocothemis erythraea</i>           | 42                   | 38                   | 50                    |
|                                      | <i>Anax imperator</i>                  | 38                   | 50                   | 20                    |
|                                      | <i>Sympetrum striolatum</i>            | 38                   | 44                   | 30                    |
|                                      | <i>Calopteryx splendens</i>            | 31                   | 25                   | 40                    |
|                                      | <i>Gomphus pulchellus</i>              | 27                   | 25                   | 30                    |
|                                      | <i>Chalcolestes viridis</i>            | 23                   | 25                   | 20                    |
|                                      | <i>Sympetrum spec.</i>                 | 23                   | 25                   | 20                    |
|                                      | <i>Anax parthenope</i>                 | 19                   | 19                   | 20                    |
|                                      | <i>Erythromma najas</i>                | 15                   | 19                   | 10                    |
|                                      | unidentified <i>Aeshnidae</i>          | 15                   | 13                   | 20                    |
|                                      | <i>Coenagrion pulchellum</i>           | 15                   | 13                   | 20                    |
|                                      | <i>Libellula quadrimaculata</i>        | 15                   | 13                   | 20                    |
|                                      | <i>Sympetrum sanguineum</i>            | 15                   | 13                   | 20                    |
|                                      | <i>Cordulia aenea</i>                  | 15                   | 0                    | 40                    |

<sup>1</sup> In brackets is the frequency of occurrence for reproduction.

<sup>2</sup> *Pelophylax lessonae* and *Pelophylax ridibundus* are both threatened, their hybridogenic klepton species *Pelophylax kl. esculenta* is not.



|                                   |                               |                           |    |    |
|-----------------------------------|-------------------------------|---------------------------|----|----|
| odonata                           | <i>Pyrrhosoma nymphula</i>    | 15                        | 0  | 40 |
|                                   | <i>Somatochlora metallica</i> | 12                        | 19 | 0  |
|                                   | <i>Sympetrum vulgatum</i>     | 12                        | 13 | 10 |
|                                   | <i>Libellula depressa</i>     | 12                        | 6  | 20 |
|                                   | <i>Brachitron pratense</i>    | 12                        | 0  | 30 |
|                                   | <i>Ceriagrion tenellum</i>    | 8                         | 13 | 0  |
|                                   | <i>Calopteryx virgo virgo</i> | 8                         | 6  | 10 |
|                                   | <i>Sympetrum danae</i>        | 8                         | 0  | 20 |
|                                   | <i>Aeshna grandis</i>         | 4                         | 6  | 0  |
|                                   | <i>Erythromma lindenii</i>    | 4                         | 6  | 0  |
|                                   | <i>Lestes sponsa</i>          | 4                         | 6  | 0  |
|                                   | <i>Aeshna cyanea</i>          | 4                         | 0  | 10 |
|                                   | <i>Calopteryx spec.</i>       | 4                         | 0  | 10 |
|                                   | <i>Leucorrhinia caudalis</i>  | 4                         | 0  | 10 |
|                                   | <i>Orthetrum coerulescens</i> | 4                         | 0  | 10 |
|                                   | waterfowl                     | <i>Anas platyrhynchos</i> | 92 | 94 |
| <i>Fulica atra</i>                |                               | 88                        | 94 | 80 |
| <i>Aythya fuligula</i>            |                               | 85                        | 88 | 80 |
| <i>Anser anser</i>                |                               | 77                        | 88 | 60 |
| <i>Podiceps cristatus</i>         |                               | 65                        | 69 | 60 |
| <i>Phalacrocorax carbo</i>        |                               | 65                        | 56 | 80 |
| <i>Alopochen aegyptiaca</i>       |                               | 50                        | 44 | 60 |
| <i>Cygnus olor</i>                |                               | 46                        | 50 | 40 |
| <i>Branta canadensis</i>          |                               | 46                        | 38 | 60 |
| <i>Actitis hypoleucos</i>         |                               | 38                        | 44 | 30 |
| <i>Ardea cinerea</i>              |                               | 38                        | 25 | 60 |
| <i>Alcedo atthis</i>              |                               | 27                        | 19 | 40 |
| <i>Circus aeruginosus</i>         |                               | 23                        | 31 | 10 |
| <i>Gallinula chloropus</i>        |                               | 23                        | 19 | 30 |
| <i>Acrocephalus palustris</i>     |                               | 19                        | 25 | 10 |
| <i>Anas crecca</i>                |                               | 15                        | 25 | 0  |
| <i>Chroicocephalus ridibundus</i> |                               | 15                        | 25 | 0  |
| <i>Anas strepera</i>              |                               | 12                        | 19 | 0  |
| <i>Motacilla alba</i>             |                               | 12                        | 19 | 0  |
| <i>Pandion haliaetus</i>          |                               | 12                        | 19 | 0  |
| <i>Acrocephalus scirpaceus</i>    |                               | 12                        | 13 | 10 |
| <i>Haliaeetus albicilla</i>       |                               | 8                         | 13 | 0  |
| <i>Tadorna tadorna</i>            |                               | 8                         | 13 | 0  |
| <i>Anas clypeata</i>              |                               | 8                         | 6  | 10 |
| <i>Haematopus ostralegus</i>      |                               | 8                         | 6  | 10 |
| <i>Anas querquedula</i>           |                               | 8                         | 0  | 20 |
| <i>Ardea alba</i>                 |                               | 8                         | 0  | 20 |
| <i>Tachybaptus ruficollis</i>     |                               | 8                         | 0  | 20 |
| <i>Acrocephalus arundinaceus</i>  |                               | 4                         | 6  | 0  |
| <i>Larus fuscus</i>               |                               | 4                         | 6  | 0  |
| <i>Sterna paradisaea</i>          |                               | 4                         | 6  | 0  |
| <i>Anas penelope</i>              |                               | 4                         | 0  | 10 |
| <i>Ciconia ciconia</i>            | 4                             | 0                         | 10 |    |

|                              |                                |    |    |     |
|------------------------------|--------------------------------|----|----|-----|
|                              | <i>Mergus merganser</i>        | 4  | 0  | 10  |
| songbirds                    | <i>Fringilla coelebs</i>       | 96 | 94 | 100 |
|                              | <i>Phylloscopus collybita</i>  | 96 | 94 | 100 |
|                              | <i>Turdus merula</i>           | 92 | 88 | 100 |
|                              | <i>Turdus philomelos</i>       | 77 | 63 | 100 |
|                              | <i>Erithacus rubecula</i>      | 65 | 63 | 70  |
|                              | <i>Troglodytes troglodytes</i> | 58 | 56 | 60  |
|                              | <i>Corvus corone</i>           | 54 | 38 | 80  |
|                              | <i>Emberiza citrinella</i>     | 50 | 44 | 60  |
|                              | <i>Columba palumbus</i>        | 42 | 31 | 60  |
|                              | <i>Sylvia atricapilla</i>      | 38 | 50 | 20  |
|                              | <i>Parus caeruleus</i>         | 38 | 38 | 40  |
|                              | <i>Phylloscopus trochilus</i>  | 35 | 25 | 50  |
|                              | <i>Sylvia communis</i>         | 31 | 38 | 20  |
|                              | <i>Aegithalos caudatus</i>     | 31 | 31 | 30  |
|                              | <i>Alauda arvensis</i>         | 31 | 19 | 50  |
|                              | <i>Parus major</i>             | 27 | 13 | 50  |
|                              | <i>Acrocephalus scirpaceus</i> | 23 | 31 | 10  |
|                              | <i>Picus viridis</i>           | 15 | 6  | 30  |
|                              | <i>Remiz pendulinus</i>        | 12 | 19 | 0   |
|                              | <i>Garrulus glandarius</i>     | 12 | 13 | 10  |
|                              | <i>Corvus frugilegus</i>       | 8  | 13 | 0   |
|                              | <i>Carduelis chloris</i>       | 8  | 6  | 10  |
|                              | <i>Luscinia megarhynchos</i>   | 8  | 6  | 10  |
|                              | <i>Prunella modularis</i>      | 8  | 0  | 20  |
|                              | <i>Anthus trivialis</i>        | 4  | 6  | 0   |
|                              | <i>Carduelis carduelis</i>     | 4  | 6  | 0   |
|                              | <i>Dendrocopus major</i>       | 4  | 6  | 0   |
|                              | <i>Locustella naevia</i>       | 4  | 6  | 0   |
|                              | <i>Oriolus oriolus</i>         | 4  | 6  | 0   |
|                              | <i>Passer montanus</i>         | 4  | 6  | 0   |
| <i>Sitta europaea</i>        | 4                              | 6  | 0  |     |
| <i>Corvus corone cornix</i>  | 4                              | 0  | 10 |     |
| <i>Panurus biarmicus</i>     | 4                              | 0  | 10 |     |
| <i>Phoenicurus ochruros</i>  | 4                              | 0  | 10 |     |
| <i>Pica pica</i>             | 4                              | 0  | 10 |     |
| <i>Streptopelia decaocto</i> | 4                              | 0  | 10 |     |
| riparian trees               | <i>Betula spec.</i>            | 96 | 94 | 100 |
|                              | <i>Salix caprea</i>            | 85 | 94 | 70  |
|                              | <i>Salix alba</i>              | 85 | 88 | 80  |
|                              | <i>Alnus glutinosa</i>         | 85 | 81 | 90  |
|                              | <i>Quercus spec.</i>           | 81 | 88 | 70  |
|                              | <i>Populus tremula</i>         | 77 | 69 | 90  |
|                              | <i>Crataegus spec.</i>         | 65 | 81 | 40  |
|                              | <i>Sorbus spec.</i>            | 62 | 69 | 50  |
|                              | <i>Pinus spec.</i>             | 58 | 56 | 60  |
|                              | <i>Salix cinerea</i>           | 54 | 38 | 80  |
|                              | <i>Prunus spec.</i>            | 46 | 56 | 30  |

|                      |                                  |     |     |     |
|----------------------|----------------------------------|-----|-----|-----|
| riparian trees       | <i>Salix spec.</i>               | 46  | 44  | 50  |
|                      | <i>Fraxinus excelsior</i>        | 31  | 44  | 10  |
|                      | <i>Acer pseudoplatanus</i>       | 31  | 25  | 40  |
|                      | <i>Sambucus nigra</i>            | 27  | 38  | 10  |
|                      | <i>Acer campestre</i>            | 27  | 31  | 20  |
|                      | <i>Rosa spec.</i>                | 27  | 31  | 20  |
|                      | <i>Prunus padus</i>              | 23  | 31  | 10  |
|                      | <i>Corylus avellana</i>          | 23  | 25  | 20  |
|                      | <i>Populus spec.</i>             | 23  | 13  | 40  |
|                      | <i>Carpinus betulus</i>          | 19  | 19  | 20  |
|                      | <i>Prunus domestica</i>          | 19  | 19  | 20  |
|                      | <i>Prunus serotina</i>           | 19  | 6   | 40  |
|                      | <i>Tilia spec.</i>               | 15  | 13  | 20  |
|                      | <i>Cornus spec.</i>              | 12  | 13  | 10  |
|                      | <i>Salix babylonica</i>          | 12  | 13  | 10  |
|                      | <i>Viburnum spec.</i>            | 12  | 13  | 10  |
|                      | <i>Picea abies</i>               | 12  | 6   | 20  |
|                      | <i>Prunus avium</i>              | 12  | 6   | 20  |
|                      | <i>Ulmus spec.</i>               | 12  | 6   | 20  |
|                      | <i>Aesculus hippocastanum</i>    | 8   | 13  | 0   |
|                      | <i>Fagus sylvatica</i>           | 8   | 13  | 0   |
|                      | <i>Juglans regia</i>             | 8   | 6   | 10  |
|                      | <i>Robinia spec.</i>             | 8   | 6   | 10  |
|                      | <i>Ulmus glabra</i>              | 8   | 6   | 10  |
|                      | <i>Acer platanoides</i>          | 8   | 0   | 20  |
|                      | <i>Cornus mas</i>                | 4   | 0   | 10  |
|                      | <i>Euonymus europaeus</i>        | 4   | 6   | 0   |
|                      | <i>Ligustrum spec.</i>           | 4   | 6   | 0   |
|                      | <i>Salix purpurea</i>            | 4   | 6   | 0   |
|                      | <i>Salix viminalis</i>           | 4   | 6   | 0   |
|                      | <i>Larix decidua</i>             | 4   | 0   | 10  |
|                      | <i>Quercus robur</i>             | 4   | 0   | 10  |
| <i>Quercus rubra</i> | 4                                | 0   | 10  |     |
| riparian herbs       | <i>Poa spec.</i>                 | 100 | 100 | 100 |
|                      | <i>Rubus spec.</i>               | 96  | 100 | 90  |
|                      | <i>Deschampsia spec.</i>         | 96  | 94  | 100 |
|                      | <i>Galium aparine</i>            | 96  | 94  | 100 |
|                      | <i>Bromus spec.</i>              | 92  | 88  | 100 |
|                      | <i>Urtica dioica</i>             | 92  | 88  | 100 |
|                      | <i>Equisetum spec.</i>           | 88  | 81  | 100 |
|                      | <i>Quercus spec. (juveniles)</i> | 88  | 81  | 100 |
|                      | <i>Taraxacum officinalis</i>     | 77  | 88  | 60  |
|                      | <i>Dactylus glomerata</i>        | 77  | 75  | 80  |
|                      | <i>Phragmites australis</i>      | 77  | 75  | 80  |
|                      | <i>Juncus spec.</i>              | 77  | 69  | 90  |
|                      | Thistle                          | 73  | 75  | 70  |
|                      | <i>Prunus spec. (juveniles)</i>  | 73  | 75  | 70  |
|                      | <i>Glechoma hederacea</i>        | 73  | 69  | 80  |

riparian herbs

|                                        |    |    |    |
|----------------------------------------|----|----|----|
| <i>Plantago lanceolata</i>             | 69 | 81 | 50 |
| <i>Vicia spec.</i>                     | 69 | 81 | 50 |
| <i>Rumex spec.</i>                     | 69 | 75 | 60 |
| <i>Crataegus spec. (juveniles)</i>     | 69 | 63 | 80 |
| <i>Populus tremola (juveniles)</i>     | 69 | 63 | 80 |
| <i>Carex spec.</i>                     | 62 | 63 | 60 |
| <i>Geum urbanun</i>                    | 62 | 56 | 70 |
| <i>Rosa spec. (juveniles)</i>          | 62 | 56 | 70 |
| <i>Ranunculus spec.</i>                | 58 | 63 | 50 |
| <i>Sorbus spec. (juveniles)</i>        | 54 | 44 | 70 |
| <i>Solidago spec.</i>                  | 50 | 44 | 60 |
| <i>Aegopodium podagraria</i>           | 46 | 50 | 40 |
| <i>Prunus domestica (juveniles)</i>    | 46 | 50 | 40 |
| <i>Trifolium spec.</i>                 | 46 | 44 | 50 |
| <i>Alnus glutinosa (juveniles)</i>     | 46 | 38 | 60 |
| <i>Epilobium spec.</i>                 | 46 | 38 | 60 |
| <i>Acer campestre (juveniles)</i>      | 42 | 38 | 50 |
| <i>Prunus padus (juveniles)</i>        | 42 | 31 | 60 |
| <i>Convolvulus arvensis</i>            | 38 | 44 | 30 |
| <i>Anthriscus spec.</i>                | 38 | 38 | 40 |
| <i>Hypericum spec.</i>                 | 38 | 38 | 40 |
| <i>Prunus serotina (juveniles)</i>     | 38 | 38 | 40 |
| <i>Tanacetum vulgare</i>               | 38 | 38 | 40 |
| <i>Lycopus spec.</i>                   | 38 | 31 | 50 |
| <i>Cornus spec. (juveniles)</i>        | 35 | 38 | 30 |
| <i>Hypochaeris spec.</i>               | 35 | 38 | 30 |
| <i>Stellaria media</i>                 | 35 | 31 | 40 |
| <i>Alliaria petiolata</i>              | 35 | 19 | 60 |
| <i>Fraxinuns excelsior (juveniles)</i> | 35 | 13 | 70 |
| <i>Lotus spec.</i>                     | 35 | 13 | 70 |
| Fern                                   | 31 | 38 | 20 |
| <i>Salix cinarea (juveniles)</i>       | 31 | 31 | 30 |
| <i>Achillea millefolium</i>            | 31 | 25 | 40 |
| <i>Betula spec. (juveniles)</i>        | 31 | 25 | 40 |
| <i>Acer pseudoplatanus (juveniles)</i> | 31 | 13 | 60 |
| <i>Salix caprea (juveniles)</i>        | 27 | 38 | 10 |
| <i>Taraxacum spec.</i>                 | 27 | 38 | 10 |
| <i>Salix alba (juveniles)</i>          | 27 | 31 | 20 |
| <i>Senecio spec.</i>                   | 27 | 31 | 20 |
| <i>Mentha aquatica</i>                 | 27 | 25 | 30 |
| <i>Corylus avellana (juveniles)</i>    | 27 | 19 | 40 |
| <i>Lonicera spec.</i>                  | 27 | 13 | 50 |
| <i>Milium effusum</i>                  | 27 | 6  | 60 |
| <i>Pinus spec. (juveniles)</i>         | 23 | 25 | 20 |
| <i>Tussilago farfara</i>               | 23 | 19 | 30 |
| <i>Cardamine pratensis</i>             | 23 | 13 | 40 |
| <i>Potentilla spec.</i>                | 19 | 31 | 0  |
| <i>Populus spec. (juveniles)</i>       | 19 | 25 | 10 |

|                                       |    |    |    |
|---------------------------------------|----|----|----|
| <i>Anthriscus sylvestris</i>          | 19 | 19 | 20 |
| <i>Myosotis spec.</i>                 | 19 | 19 | 20 |
| <i>Pteridium aquilinum</i>            | 19 | 19 | 20 |
| <i>Rubus ideaus</i>                   | 19 | 19 | 20 |
| <i>Salix spec. (juveniles)</i>        | 19 | 19 | 20 |
| <i>Genista spec.</i>                  | 19 | 13 | 30 |
| <i>Geranium spec.</i>                 | 19 | 13 | 30 |
| <i>Lupinus spec.</i>                  | 19 | 13 | 30 |
| <i>Clematis vitalba</i>               | 19 | 6  | 40 |
| <i>Geranium robertianum</i>           | 19 | 6  | 40 |
| <i>Acer platanoides (juveniles)</i>   | 19 | 0  | 50 |
| <i>Carpinus betulus (juveniles)</i>   | 15 | 19 | 10 |
| <i>Galium spec.</i>                   | 15 | 19 | 10 |
| <i>Ranunculus acris</i>               | 15 | 19 | 10 |
| <i>Viburnum spec. (juveniles)</i>     | 15 | 19 | 10 |
| <i>Hedera helix</i>                   | 15 | 13 | 20 |
| <i>Iris spec.</i>                     | 15 | 13 | 20 |
| <i>Bellis perennis</i>                | 12 | 19 | 0  |
| <i>Heracleum sphondylium</i>          | 12 | 19 | 0  |
| <i>Hieracium pilosella</i>            | 12 | 19 | 0  |
| <i>Lamium album</i>                   | 12 | 19 | 0  |
| <i>Plantago major</i>                 | 12 | 19 | 0  |
| <i>Ranunculus repens</i>              | 12 | 19 | 0  |
| <i>Scirpus spec.</i>                  | 12 | 19 | 0  |
| <i>Artemisia vulgaris</i>             | 12 | 13 | 10 |
| <i>Iris pseudacorus</i>               | 12 | 13 | 10 |
| <i>Phalaris spec.</i>                 | 12 | 13 | 10 |
| <i>Trifolium campestre</i>            | 12 | 13 | 10 |
| <i>Arrhenaterum spec.</i>             | 12 | 6  | 20 |
| <i>Bromus erectus</i>                 | 12 | 6  | 20 |
| <i>Capsella bursa-pastoris</i>        | 12 | 6  | 20 |
| <i>Chelidonium majus</i>              | 12 | 6  | 20 |
| <i>Euonymus europaeus (juveniles)</i> | 12 | 6  | 20 |
| <i>Fabaceae</i>                       | 12 | 6  | 20 |
| <i>Fagus sylvatica (juveniles)</i>    | 12 | 6  | 20 |
| <i>Fragaria vesca</i>                 | 12 | 6  | 20 |
| <i>Hieracium spec.</i>                | 12 | 6  | 20 |
| <i>Humulus spec.</i>                  | 12 | 6  | 20 |
| <i>Lysimachia nummularia</i>          | 12 | 6  | 20 |
| <i>Oenothera spec.</i>                | 12 | 6  | 20 |
| <i>Poa annua</i>                      | 12 | 6  | 20 |
| <i>Ligustrum spec. (juveniles)</i>    | 12 | 0  | 30 |
| <i>Cerastium holosteoides</i>         | 8  | 13 | 0  |
| <i>Cornus sanguinea (juveniles)</i>   | 8  | 13 | 0  |
| <i>Filipendula ulmaria</i>            | 8  | 13 | 0  |
| <i>Juncus subnodulosus</i>            | 8  | 13 | 0  |
| <i>Leucanthemum spec.</i>             | 8  | 13 | 0  |
| <i>Oenothera biennis</i>              | 8  | 13 | 0  |

|                                   |   |    |    |
|-----------------------------------|---|----|----|
| <i>Orchidee</i>                   | 8 | 13 | 0  |
| <i>Phalaris arundinacea</i>       | 8 | 13 | 0  |
| <i>Scandix pecten-veneris</i>     | 8 | 13 | 0  |
| <i>Solidago virgaurea</i>         | 8 | 13 | 0  |
| <i>Tilia spec. (juveniles)</i>    | 8 | 13 | 0  |
| <i>Veronica spec.</i>             | 8 | 13 | 0  |
| <i>Sambucus nigra (juveniles)</i> | 8 | 6  | 10 |
| <i>Silene dioica</i>              | 8 | 6  | 10 |
| <i>Solidago canadensis</i>        | 8 | 6  | 10 |
| <i>Solanaceae</i>                 | 8 | 6  | 10 |
| <i>Viola spec.</i>                | 8 | 6  | 10 |
| <i>Deschampsia flexuosa</i>       | 8 | 0  | 20 |
| <i>Prunus avium (juveniles)</i>   | 8 | 0  | 20 |
| <i>Stellaria spec.</i>            | 8 | 0  | 20 |
| <i>Artemisia spec.</i>            | 8 | 0  | 20 |
| <i>Agrimonia eupatoria</i>        | 4 | 6  | 0  |
| <i>Allium ursinum</i>             | 4 | 6  | 0  |
| <i>Alopecurus pratensis</i>       | 4 | 6  | 0  |
| <i>Alopecurus spec.</i>           | 4 | 6  | 0  |
| <i>Arabidopsis thalia</i>         | 4 | 6  | 0  |
| <i>Arctium spec.</i>              | 4 | 6  | 0  |
| <i>Argentina anserina</i>         | 4 | 6  | 0  |
| <i>Bambus</i>                     | 4 | 6  | 0  |
| <i>Bromus hordeaceus</i>          | 4 | 6  | 0  |
| <i>Carex aquatilis</i>            | 4 | 6  | 0  |
| <i>Circaea spec.</i>              | 4 | 6  | 0  |
| <i>Crepis spec.</i>               | 4 | 6  | 0  |
| <i>Cyanus spec.</i>               | 4 | 6  | 0  |
| <i>Erica vulagris</i>             | 4 | 6  | 0  |
| <i>Epilobium hirsutum</i>         | 4 | 6  | 0  |
| <i>Heracleum spec.</i>            | 4 | 6  | 0  |
| <i>Leucanthemum vulgare</i>       | 4 | 6  | 0  |
| <i>Lamium purpurea</i>            | 4 | 6  | 0  |
| <i>Lathyrus spec.</i>             | 4 | 6  | 0  |
| <i>Linum spec.</i>                | 4 | 6  | 0  |
| <i>Lotus purpureus</i>            | 4 | 6  | 0  |
| <i>Lycopus europaeus</i>          | 4 | 6  | 0  |
| <i>Picea abies (juveniles)</i>    | 4 | 6  | 0  |
| <i>Picris hieracioides</i>        | 4 | 6  | 0  |
| <i>Polygonaceae</i>               | 4 | 6  | 0  |
| <i>Raphanus raphanistrum</i>      | 4 | 6  | 0  |
| <i>Rumex acetosella</i>           | 4 | 6  | 0  |
| <i>Sanguisorba minor</i>          | 4 | 6  | 0  |
| <i>Sanguisorba officinalis</i>    | 4 | 6  | 0  |
| <i>Senecio inaequidens</i>        | 4 | 6  | 0  |
| <i>Tragopogon spec.</i>           | 4 | 6  | 0  |
| <i>Trifolium aureum</i>           | 4 | 6  | 0  |
| <i>Trifolium dubium</i>           | 4 | 6  | 0  |

|                                    |                                  |   |    |    |
|------------------------------------|----------------------------------|---|----|----|
| riparian herbs                     | <i>Veronica chamaedrys</i>       | 4 | 6  | 0  |
|                                    | <i>Cornus mas (juveniles)</i>    | 4 | 0  | 10 |
|                                    | <i>Hieracium aurantiacum</i>     | 4 | 0  | 10 |
|                                    | <i>Juglans regia (juveniles)</i> | 4 | 0  | 10 |
|                                    | <i>Lamium galeobdolon</i>        | 4 | 0  | 10 |
|                                    | <i>Lamium maculatum</i>          | 4 | 0  | 10 |
|                                    | <i>Mentha spec.</i>              | 4 | 0  | 10 |
|                                    | <i>Osmunda regalis</i>           | 4 | 0  | 10 |
|                                    | <i>Oxalis spec.</i>              | 4 | 0  | 10 |
|                                    | <i>Papaver spec.</i>             | 4 | 0  | 10 |
|                                    | <i>Poa nemoralis</i>             | 4 | 0  | 10 |
|                                    | <i>Quercus robur (juveniles)</i> | 4 | 0  | 10 |
|                                    | <i>Saponaria spec.</i>           | 4 | 0  | 10 |
|                                    | <i>Silene latifolia</i>          | 4 | 0  | 10 |
|                                    | <i>Sisymbrium officinale</i>     | 4 | 0  | 10 |
|                                    | <i>Ulmus spec. (juveniles)</i>   | 4 | 0  | 10 |
|                                    | <i>Verbascum spec.</i>           | 4 | 0  | 10 |
| <i>Viburnum latana (juveniles)</i> | 4                                | 0 | 10 |    |

Table S8: Variance inflation factors (VIFs) for explanatory variables (axes from from Table S5 & Table S6). VIFs > 5 indicate highly correlated variables in the multivariate space.

| <b>Variable</b>                    | <b>VIF</b> |
|------------------------------------|------------|
| lake shallowness                   | 4.70       |
| lake steepness                     | 2.35       |
| vegetated habitat                  | 2.13       |
| woody habitat                      | 3.46       |
| trophic state                      | 3.16       |
| nitrogen                           | 1.82       |
| conductivity                       | 2.94       |
| acidity                            | 2.48       |
| agriculture                        | 2.70       |
| wetland                            | 2.84       |
| distance to next river             | 1.50       |
| rural                              | 2.77       |
| general recreational use intensity | 4.23       |
| non-accessibility                  | 2.58       |
| Age                                | 2.72       |

Table S9: PCA-axes and their interpretation for species richness including the loadings of explanatory variables from RDA. Names of these variables are interpretations from Table S5 & Table S6. Only the first four axes are shown. Other axes had eigenvalues < 1.

| <i>Species richness</i>                      | <b>Dim 1</b>                     | <b>Dim 2</b>                   | <b>Dim 3</b>          | <b>Dim 4</b>     |
|----------------------------------------------|----------------------------------|--------------------------------|-----------------------|------------------|
| <i>Eigenvalue</i>                            | 2.24                             | 1.37                           | 1.31                  | 0.97             |
| <i>Proportion of variance explained in %</i> | 32.02                            | 19.57                          | 18.73                 | 13.92            |
| submerged macrophytes                        | -0.32                            | 0.75                           | 0.47                  | -0.08            |
| riparian_herbs                               | 0.62                             | -0.35                          | 0.53                  | -0.29            |
| riparian_trees                               | -0.59                            | 0.13                           | 0.71                  | 0.03             |
| amphibians                                   | 0.75                             | 0.23                           | 0.19                  | -0.31            |
| odonata                                      | 0.50                             | 0.61                           | -0.30                 | -0.34            |
| song_birds                                   | 0.64                             | -0.21                          | 0.42                  | 0.40             |
| waterfowl                                    | 0.44                             | 0.45                           | -0.05                 | 0.72             |
| <i>Interpretation of Axes</i>                | <i>Riparian Species Richness</i> | <i>Macrophytes and Odonata</i> | <i>Riparian Trees</i> | <i>Waterfowl</i> |
| woody_habitat                                | -0.67                            | 0.22                           | 0.18                  | -0.02            |
| vegetated_habitat                            | -0.13                            | 0.49                           | -0.21                 | -0.18            |
| rural                                        | 0.10                             | 0.23                           | 0.03                  | -0.11            |
| lake_steepness                               | -0.08                            | -0.34                          | -0.26                 | -0.48            |



Table S10: PCA-axes and their interpretation for conservation value including the loadings of explanatory variables from RDA. Names of these variables are interpretations from Table S5 & Table S6. Only the first four axes are shown. Other axes had eigenvalues < 1.

| <b>Conservation value</b>                    | <b>Dim 1</b>                                                        | <b>Dim 2</b>                        | <b>Dim 3</b>                             | <b>Dim 4</b>      |
|----------------------------------------------|---------------------------------------------------------------------|-------------------------------------|------------------------------------------|-------------------|
| <i>Eigenvalue</i>                            | 2.17                                                                | 1.51                                | 1.21                                     | 0.90              |
| <i>Proportion of variance explained in %</i> | 30.99                                                               | 21.59                               | 17.35                                    | 12.87             |
| macrophytes                                  | 0.74                                                                | 0.00                                | 0.17                                     | -0.40             |
| riparian_herbs                               | 0.44                                                                | -0.33                               | 0.79                                     | -0.02             |
| riparian_trees                               | 0.41                                                                | -0.50                               | -0.71                                    | -0.12             |
| amphibians                                   | -0.76                                                               | 0.30                                | 0.03                                     | -0.06             |
| odonata                                      | 0.48                                                                | 0.10                                | -0.02                                    | 0.84              |
| song_birds                                   | 0.23                                                                | 0.87                                | 0.03                                     | -0.08             |
| waterfowl                                    | 0.63                                                                | 0.54                                | -0.24                                    | -0.11             |
| <i>Interpretation of Axes</i>                | <i>Aquatic conservation value (macrophytes, odonata, waterfowl)</i> | <i>Songbirds conservation value</i> | <i>Riparian herbs conservation value</i> | <i>(not used)</i> |
| woody_habitat                                | 0.15                                                                | -0.46                               | 0.32                                     | -0.21             |
| general_recreational use_intensity           | 0.43                                                                | 0.22                                | 0.15                                     | -0.17             |
